# Supplementary material for: Vero cells gain renal tubule markers in low-calcium and magnesium chemically defined media
Source: Sci Rep. 2022 Apr 13;12:6180. doi: 10.1038/s41598-022-10221-z (PMC9008052; doi:10.1038/s41598-022-10221-z)
Supplement: Supplementary file 2 — Supplementary Table S3. [file 41598_2022_10221_MOESM2_ESM.xlsx]

## Sheet: in
Supplementaty Table S3. RSEM pseudocount estimates after alignment to Chlorocebus sabaeus Ensembl reference genome with STAR for all thirteen samples and all genes.
Chlorocebus sabaeus gene_id	Chlorocebus sabaeus transcript_id	Con1	Con2	Con3	Con4	Con5	Adh1	Adh2	Adh3	Adh4	Sus1	Sus2	Sus3	Sus4
ENSCSAG00000000001	ENSCSAT00000000001	0	0	0	0	0	0	0	0	0	0	0	0	0
ENSCSAG00000000002	ENSCSAT00000000002	16335	15054	16285	12132	13939	14803	6366	11292	11958	21588	16249	15371	12815
ENSCSAG00000000003	ENSCSAT00000000003	0	0	0	0	0	0	0	0	0	0	0	0	0
ENSCSAG00000000004	ENSCSAT00000000004	35840	34059	36438	26563	23791	28593	12199	20726	22337	35449	27232	25655	21103
ENSCSAG00000000005	ENSCSAT00000000005	0	0	0	0	0	0	0	0	0	0	0	0	0
ENSCSAG00000000006	ENSCSAT00000000006	52708	50083	55341	48363	44645	66135	25485	41708	34353	61895	45677	42774	33078
ENSCSAG00000000007	ENSCSAT00000000007	0	0	0	0	0	0	0	0	0	0	0	0	0
ENSCSAG00000000008	ENSCSAT00000000008	0	0	0	0	0	0	0	0	0	0	0	0	0
ENSCSAG00000000009	ENSCSAT00000000009	0	0	0	0	0	0	0	0	0	0	1	0	0
ENSCSAG00000000010	ENSCSAT00000000010	80093	75485	83575	72187	73447	104071	40889	66765	55172	137273	104462	97353	72630
ENSCSAG00000000011	ENSCSAT00000000011	0	0	0	0	0	0	0	0	0	0	0	0	0
ENSCSAG00000000012	ENSCSAT00000000012	0	0	0	0	1	1	0	0	0	2	0	2	1
ENSCSAG00000000013	ENSCSAT00000000013	0	0	0	0	0	0	0	0	0	0	1	0	1
ENSCSAG00000000014	ENSCSAT00000000014	0	0	0	0	0	0	0	0	0	0	0	0	0
ENSCSAG00000000015	ENSCSAT00000000015	0	0	0	0	0	1	0	1	0	0	0	0	1
ENSCSAG00000000016	ENSCSAT00000000016	312321	301126	333070	282189	214637	388553	167384	265167	233819	701304	549618	516068	410430
ENSCSAG00000000017	ENSCSAT00000000017	1	2	3	1	0	2	2	0	0	2	1	3	0
ENSCSAG00000000018	ENSCSAT00000000018	0	0	0	0	0	0	0	0	0	0	0	0	0
ENSCSAG00000000019	ENSCSAT00000000019	194239	188221	206686	176813	154942	305861	118693	196749	216229	467106	369298	341458	312991
ENSCSAG00000000020	ENSCSAT00000000020	0	0	0	0	0	0	0	0	0	0	0	0	0
ENSCSAG00000000021	ENSCSAT00000000021	9973	9366	10540	9536	8753	11718	5419	9170	6317	15329	11727	10808	8432
ENSCSAG00000000022	ENSCSAT00000000022	56937	55112	60773	55800	51646	74430	28993	47764	54498	91880	70993	66043	61194
ENSCSAG00000000023	ENSCSAT00000000023	155244	148768	164494	142913	130491	228448	90632	148536	154335	300637	234709	217112	189212
ENSCSAG00000000024	ENSCSAT00000000024	0	0	0	0	0	0	0	0	0	0	0	0	0
ENSCSAG00000000025	ENSCSAT00000000025	5032	4785	5331	5193	5136	8428	3455	6246	6554	10057	8025	7172	7613
ENSCSAG00000000026	ENSCSAT00000000026	0	0	0	0	0	0	0	0	0	0	0	0	0
ENSCSAG00000000027	ENSCSAT00000000027	7318	6987	7587	6421	6221	9764	4579	7514	3266	14512	11024	10244	5956
ENSCSAG00000000028	ENSCSAT00000000028	70057	66566	73051	63578	59700	103923	41804	67279	57852	146574	111010	104601	80946
ENSCSAG00000000029	ENSCSAT00000000029	0	0	0	0	0	0	0	0	0	0	0	0	0
ENSCSAG00000000030	ENSCSAT00000000030	0	0	0	0	0	0	0	0	0	0	0	0	0
ENSCSAG00000000031	ENSCSAT00000000031	0	0	0	0	0	0	0	0	0	0	0	0	0
ENSCSAG00000000032	ENSCSAT00000000032	80351	76962	82807	72947	66354	87915	39699	62807	40475	158259	118174	112291	64760
ENSCSAG00000000033	ENSCSAT00000000033	14822	14364	15757	13840	12471	18499	7691	12609	17151	30880	23371	22540	19308
ENSCSAG00000000034	ENSCSAT00000000034	0	0	0	0	0	0	0	0	0	0	0	0	0
ENSCSAG00000000035	ENSCSAT00000000035	122877	117158	128868	111410	106541	189700	76453	123269	108092	185756	144437	134785	103314
ENSCSAG00000000036	ENSCSAT00000000036	0	0	0	0	0	0	0	0	0	0	1	0	0
ENSCSAG00000000037	ENSCSAT00000000037	0	0	0	0	0	0	0	0	0	0	0	0	1
ENSCSAG00000000038	ENSCSAT00000018497	0	0	0	0	0	0	0	0	0	0	0	0	0
ENSCSAG00000000039	ENSCSAT00000018496	0	0	0	0	1	0	0	0	0	0	0	0	0
ENSCSAG00000000040	ENSCSAT00000018495	0	1	1	0	4	0	0	0	0	0	0	0	0
ENSCSAG00000000041	ENSCSAT00000018494	0	0	0	0	0	1	0	0	0	1	0	0	0
ENSCSAG00000000042	ENSCSAT00000018493	0	0	0	0	0	0	0	0	0	0	0	0	0
ENSCSAG00000000043	ENSCSAT00000018492	0	0	0	0	1	1	0	0	1	1	0	0	0
ENSCSAG00000000044	ENSCSAT00000018491	0	0	0	0	0	0	0	0	0	0	0	0	0
ENSCSAG00000000045	ENSCSAT00000018490	0	0	0	0	0	0	0	0	0	0	0	0	0
ENSCSAG00000000046	ENSCSAT00000018489	0	0	0	0	0	0	0	0	0	0	0	0	0
ENSCSAG00000000047	ENSCSAT00000018488	0	1.06	2.12	1.06	2.12	0	1.06	0	1.07	1.04	0	0	1.06
ENSCSAG00000000048	ENSCSAT00000018487	4.11	5.12	3.06	3.08	2.05	1.02	2.06	1.02	5.13	1	3.08	2.04	1.02
ENSCSAG00000000049	ENSCSAT00000018486	0	0	0	0	0	0	0	0	0	0	0	0	0
ENSCSAG00000000050	ENSCSAT00000018485	0	1	3	1	0	3	0	1	1	2	4	3	3
ENSCSAG00000000051	ENSCSAT00000018484	0	0	0	0	0	0	0	0	0	0	0	0	0
ENSCSAG00000000052	ENSCSAT00000018483	130	121	110	136	104	192	145	223	290	318	307	221	420
ENSCSAG00000000053	ENSCSAT00000018482	0	0	0	0	0	0	0	0	0	0	0	0	0
ENSCSAG00000000054	ENSCSAT00000018481	0	0	0	0	0	0	0	0	0	0	0	0	0
ENSCSAG00000000055	ENSCSAT00000018480	1373	1326	1425	1385	1414	1107	910	1221	1264	1028	1186	938	1301
ENSCSAG00000000056	ENSCSAT00000018479	0	0	0	1	0	0	0	0	0	0	0	0	0
ENSCSAG00000000057	ENSCSAT00000018477	98	102	99	142	118	87	71	75	200	96	108	80	199
ENSCSAG00000000058	ENSCSAT00000018478	6.07	3.04	5.11	6.97	3.08	4.06	2.03	6.13	2.03	0	1.02	2.12	1.03
ENSCSAG00000000059	ENSCSAT00000018476	3	3	3	5	1	2	1	3	3	2	0	0	1
ENSCSAG00000000060	ENSCSAT00000018475	2	2	0	4	0	0	2	2	0	0	0	0	0
ENSCSAG00000000061	ENSCSAT00000018474	0	0	0	0	0	0	0	0	0	0	0	0	0
ENSCSAG00000000062	ENSCSAT00000018473	209	192	203	173	178	176	167	202	257	41	51	54	66
ENSCSAG00000000063	ENSCSAT00000018472	0	0	0	0	0	0	0	0	0	0	0	0	0
ENSCSAG00000000064	ENSCSAT00000018471	0	0	0	0	0	0	0	0	0	0	0	0	0
ENSCSAG00000000065	ENSCSAT00000018470	36	37	30	44	22	35	31	31	26	19	17	16	20
ENSCSAG00000000066	ENSCSAT00000018469	0	0	0	0	0	0	0	0	0	0	0	0	0
ENSCSAG00000000067	ENSCSAT00000018467	0	0	0	0	0	0	0	0	0	0	0	0	0
ENSCSAG00000000068	ENSCSAT00000018468	0	0	0	0	0	0	0	0	0	0	0	0	0
ENSCSAG00000000069	ENSCSAT00000018466	0	0	0	0	0	0	0	0	0	0	0	0	0
ENSCSAG00000000070	ENSCSAT00000018464	0	0	0	0	0	0	0	0	0	0	0	0	0
ENSCSAG00000000071	ENSCSAT00000018465	2.3	0	0	0	0	0	0	0	0	0	0	0	1.28
ENSCSAG00000000072	ENSCSAT00000018463	0	0	0	0	0	0	0	0	0	0	0	0	0
ENSCSAG00000000073	ENSCSAT00000018461	0	0	0	0	0	0	0	0	0	0	0	0	0
ENSCSAG00000000074	ENSCSAT00000018462	0	0	0	0	0	0	0	1	0	0	0	0	0
ENSCSAG00000000075	ENSCSAT00000018460	0	0	0	0	0	0	0	0	0	0	0	0	0
ENSCSAG00000000076	ENSCSAT00000018459	404.81	410.9	391.25	501.52	416.55	303.52	241.87	321.36	533.35	336.29	347.73	308.52	609.37
ENSCSAG00000000077	ENSCSAT00000018458	0	0	0	0	0	0	0	0	0	0	0	0	0
ENSCSAG00000000078	ENSCSAT00000018457	2	6	4	2	1	0	1	4	0	9	1	3	1
ENSCSAG00000000079	ENSCSAT00000018456	16	10	12	13	9	87	57	79	106	40	45	54	63
ENSCSAG00000000080	ENSCSAT00000018455	0	0	0	0	0	0	0	0	0	0	0	1	0
ENSCSAG00000000081	ENSCSAT00000018454	0	0	0	0	0	0	0	0	0	0	0	0	0
ENSCSAG00000000082	ENSCSAT00000018453	0	0	0	0	0	0	0	0	1	0	0	0	0
ENSCSAG00000000083	ENSCSAT00000018452	83	89	98	77	130	107	70	102	82	91	115	105	103
ENSCSAG00000000084	ENSCSAT00000018451	0	0	0	0	0	0	0	0	0	0	0	0	0
ENSCSAG00000000085	ENSCSAT00000018450	0	2	0	0	0	0	0	0	0	2	0	1	0
ENSCSAG00000000086	ENSCSAT00000018449	0	0	0	0	0	0	0	0	0	0	0	0	0
ENSCSAG00000000087	ENSCSAT00000018448	0	1	0	0	0	0	0	0	0	0	0	0	0
ENSCSAG00000000088	ENSCSAT00000018447	0	0	0	0	0	0	0	0	0	0	0	0	0
ENSCSAG00000000089	ENSCSAT00000018446	0	0	0	0	0	0	0	0	0	0	0	0	0
ENSCSAG00000000090	ENSCSAT00000018444	6	1.05	4	3.01	5	7	5.01	7.96	11.33	14	17.01	13.32	27.73
ENSCSAG00000000091	ENSCSAT00000018445	126	123	140	113	110	125	110	176	150	100	119	102	117
ENSCSAG00000000092	ENSCSAT00000018443	0	0	0	0	0	0	0	0	0	0	0	0	0
ENSCSAG00000000093	ENSCSAT00000018442	0	0	0	0	0	0	0	0	0	0	0	0	0
ENSCSAG00000000094	ENSCSAT00000018441	1.8	2.35	0	1.93	4.55	0	0	1.99	0	2.5	1.74	0.02	0
ENSCSAG00000000095	ENSCSAT00000018440	0	0	0	0	0	0	0	0	0	0	0	0	0
ENSCSAG00000000096	ENSCSAT00000018439	36.2	35.65	39	33.07	50.45	20	20	20.01	22	2.5	5.26	0.98	3
ENSCSAG00000000097	ENSCSAT00000018438	8.27	16.33	10.61	22.63	19.14	19	7.62	12.96	7.42	8.42	15.97	14.05	16.72
ENSCSAG00000000098	ENSCSAT00000018437	126	134	117	167	128	110	65	99	220	130	101	120	273
ENSCSAG00000000099	ENSCSAT00000018435	59	45	53	52	38	37	27	48	52	23	21	13	24
ENSCSAG00000000100	ENSCSAT00000018436	5	2	5.03	1	3	1	2	3	2.02	1	1	3.02	3
ENSCSAG00000000101	ENSCSAT00000018433	0	0	0	0	0	0	0	0	0	0	0	0	0
ENSCSAG00000000102	ENSCSAT00000018434	0	0	0	0	0	0	0	0	0	0	0	0	0
ENSCSAG00000000103	ENSCSAT00000018432	0	0	0	0	0	0	0	0	0	0	0	0	0
ENSCSAG00000000104	ENSCSAT00000018431	59	65	69	66	61	190	102	173	67	160	160	151	152
ENSCSAG00000000105	ENSCSAT00000018430	434	440	452	450	493	323	241	304	311	278	278	222	315
ENSCSAG00000000106	ENSCSAT00000018429	0	0	1	0	0	1	4	2	8	10	11	9	21
ENSCSAG00000000107	ENSCSAT00000018428	0	0	0	0	0	0	0	0	0	0	0	0	0
ENSCSAG00000000108	ENSCSAT00000018427	0	0	0	0	0	0	0	0	0	0	0	0	0
ENSCSAG00000000109	ENSCSAT00000018426	0	0	0	0	0	0	0	0	0	0	0	0	0
ENSCSAG00000000110	ENSCSAT00000018425	142	125	149	135	146	187	120	203	209	131	120	146	169
ENSCSAG00000000111	ENSCSAT00000018424	0	0	0	0	0	0	0	0	0	0	0	0	0
ENSCSAG00000000112	ENSCSAT00000018423	35	36	44	42	32	37	32	56	2	29	20	30	10
ENSCSAG00000000113	ENSCSAT00000018422	30	38	37	28	31	45	34	52	20	18	23	12	9
ENSCSAG00000000114	ENSCSAT00000018421	204	180	219	165	182	183	162	194	97	150	159	132	121
ENSCSAG00000000115	ENSCSAT00000018420	25	21	31	23	31	60	28	47	67	52	56	55	87
ENSCSAG00000000116	ENSCSAT00000018419	7	15	13	13	13	5	6	7	12	3	6	5	3
ENSCSAG00000000117	ENSCSAT00000018418	2	2	5	1	3	3	10	4	2	1	2	2	2
ENSCSAG00000000118	ENSCSAT00000018417	466	488	440	453	473	345	367	444	285	414	428	368	386
ENSCSAG00000000119	ENSCSAT00000018416	16.95	11.56	15.23	14.67	20.49	10.13	16.58	16.17	11.76	13.26	12.67	19.18	15.91
ENSCSAG00000000120	ENSCSAT00000018415	0	0	0	0	0	0	0	0	0	0	0	0	0
ENSCSAG00000000121	ENSCSAT00000018414	29	32	29.13	24	34	21	32	34	49	18	18	23	35
ENSCSAG00000000122	ENSCSAT00000018413	31	38	26	35	35	62	35	70	58	40	62	50	62
ENSCSAG00000000123	ENSCSAT00000018412	114	122	111	116	130	134	132	153	264	153	170	152	265
ENSCSAG00000000124	ENSCSAT00000018411	95	72	84	91	87	67	58	83	105	83	103	93	189
ENSCSAG00000000125	ENSCSAT00000018410	0	0	0	0	0	0	0	0	0	0	0	0	0
ENSCSAG00000000126	ENSCSAT00000018409	221	191	250	197	193	211	175	234	261	192	207	152	191
ENSCSAG00000000127	ENSCSAT00000018408	0	0	0	0	0	0	0	0	0	0	0	0	0
ENSCSAG00000000128	ENSCSAT00000018407	1	0	0	1	2	0	0	0	0	0	0	0	0
ENSCSAG00000000129	ENSCSAT00000018406	0	0	0	0	0	0	0	0	0	0	0	0	0
ENSCSAG00000000130	ENSCSAT00000018405	32	32	31	21	19	35	20	39	28	31	33	32	40
ENSCSAG00000000131	ENSCSAT00000018404	0	0	0	0	0	0	0	0	0	0	0	0	0
ENSCSAG00000000132	ENSCSAT00000018403	38	43	55	49	35	80	66	57	67	46	46	53	54
ENSCSAG00000000133	ENSCSAT00000018402	14	9	11	13	7	16	10	12	11	13	12	8	13
ENSCSAG00000000134	ENSCSAT00000018401	69	78	65	87	95	123	114	126	173	107	107	93	199
ENSCSAG00000000135	ENSCSAT00000018400	0	0	1	1	0	3	1	4	6	0	3	0	2
ENSCSAG00000000136	ENSCSAT00000018399	7	4	0	3	1	1	2	0	1	5	2	5	1
ENSCSAG00000000137	ENSCSAT00000018398	17	22	12	13	10	30	14	27	25	23	20	14	21
ENSCSAG00000000138	ENSCSAT00000018397	2	7	3	6	0	12	5	8	20	0	0	0	1
ENSCSAG00000000139	ENSCSAT00000018396	0	0	0	1	0	0	1	0	0	4	1	0	3
ENSCSAG00000000140	ENSCSAT00000018395	0	0	1	1	0	1	0	0	2	0	1	4	4
ENSCSAG00000000141	ENSCSAT00000018394	4	2	0	1	0	1	0	2	0	0	0	0	1
ENSCSAG00000000142	ENSCSAT00000018393	5976.03	5957.3	6529.45	6270.45	6251.88	4478.28	3666.47	4826.98	8089.05	5933.93	6181.37	5218.88	10119.9
ENSCSAG00000000143	ENSCSAT00000018392	0	0	0	0	0	0	0	0	0	0	0	0	0
ENSCSAG00000000144	ENSCSAT00000018391	14	11.3	26.16	15.21	9.06	11.08	11	21.35	20.13	14.23	10.18	9.23	12.25
ENSCSAG00000000145	ENSCSAT00000018390	0	0	1	2	0	0	1	1	0	1	1	2	1
ENSCSAG00000000146	ENSCSAT00000018389	92	96	125	101	119	83	58	93	73	80	80	77	103
ENSCSAG00000000147	ENSCSAT00000018388	3118	3190	3402	3121	3810	2370	2029	2656	4187	2522	2773	2328	3853.99
ENSCSAG00000000148	ENSCSAT00000018387	0	0	0	0	0	0	0	0	0	1	1	0	0
ENSCSAG00000000149	ENSCSAT00000018386	724	695	768	678	979	773	604	880	889	1056	992	891	1060
ENSCSAG00000000150	ENSCSAT00000018385	1	0	0	0	1	0	0	0	0	0	0	0	0
ENSCSAG00000000151	ENSCSAT00000018384	2	2	1	2	0	2	0	1	6	0	3	0	1
ENSCSAG00000000152	ENSCSAT00000018383	147.25	132.61	156.9	165.77	171.01	80.58	55.24	74.23	151.68	30.88	23.3	17.65	44.74
ENSCSAG00000000153	ENSCSAT00000018382	0	0	0	0	0	0	0	0	0	0	0	0	0
ENSCSAG00000000154	ENSCSAT00000018381	605	572	593	552	525	585	464	656	515	489	439	406	544
ENSCSAG00000000155	ENSCSAT00000018380	16.01	15.81	11	14	16.23	10	5.97	14	13.79	16	6	12.97	7.91
ENSCSAG00000000156	ENSCSAT00000018379	333	261	295	330	344	178	181	255	395	192	217	197	376
ENSCSAG00000000157	ENSCSAT00000018378	72.03	80	95	93	99	83	63.05	92	181.06	72	88	49	160.69
ENSCSAG00000000158	ENSCSAT00000018377	0	0	0	0	0	0	0	0	0	0	0	0	0
ENSCSAG00000000159	ENSCSAT00000018376	0	0	0	0	0	0	0	0	0	0	0	0	0
ENSCSAG00000000160	ENSCSAT00000018375	5	5	5	5	2	9	6	15	12	1	2	2	2
ENSCSAG00000000161	ENSCSAT00000018374	139	113	141	137	125	131	81	115	109	143	124	115	198
ENSCSAG00000000162	ENSCSAT00000018373	1	2	1	0	1.99	0	0	1.25	2.01	0	0	1.01	1
ENSCSAG00000000163	ENSCSAT00000018372	347	374	335	440	432	291	241	303	559	298	306	259	584
ENSCSAG00000000164	ENSCSAT00000018371	43	57	51	36	42	27	31	24	13	14	5	2	9
ENSCSAG00000000165	ENSCSAT00000018370	0	0	2	0	0	0	0	0	0	0	0	0	0
ENSCSAG00000000166	ENSCSAT00000018369	0	0	0	0	0	0	0	0	0	0	0	0	0
ENSCSAG00000000167	ENSCSAT00000018368	0	0	0	0	0	0	0	0	0	0	0	2	2
ENSCSAG00000000168	ENSCSAT00000018367	0	0	0	0	0	2	1	0	0	2	1	0	2
ENSCSAG00000000169	ENSCSAT00000018366	0	0	0	0	0	0	0	0	0	0	0	1	0
ENSCSAG00000000170	ENSCSAT00000018365	59	70.95	87.91	77.99	79	118	93.99	142.79	139.82	313	401.36	235.14	374.27
ENSCSAG00000000171	ENSCSAT00000018364	559	536	596	537	703	34	37	27	61	0	1	0	2
ENSCSAG00000000172	ENSCSAT00000018363	0	0	0	0	0	0	0	0	0	0	0	0	0
ENSCSAG00000000173	ENSCSAT00000018362	0	3	4	0	2	3	5	8	3	4	4	7	2
ENSCSAG00000000174	ENSCSAT00000018361	306	274	316	346	310	235	216	300	574	222	223	172	464
ENSCSAG00000000175	ENSCSAT00000018360	0	0	0	0	0	0	0	0	0	0	0	0	0
ENSCSAG00000000176	ENSCSAT00000018359	0	0	0	1.35	2.75	0	0	1.38	0	0	0	0	0
ENSCSAG00000000177	ENSCSAT00000018358	28	29	27	30	18	16	9	8	9	3	5	9	1
ENSCSAG00000000178	ENSCSAT00000018357	49	47	40	53	52	53	41	53	87	98	77	67	113
ENSCSAG00000000179	ENSCSAT00000018356	0	0	0	0	0	0	0	0	0	0	0	0	0
ENSCSAG00000000180	ENSCSAT00000018355	0	0	0	0	0	1	0	0	0	3	4	2	3
ENSCSAG00000000181	ENSCSAT00000018354	3.94	1.97	4.05	6.24	4.09	1.73	2.01	8.51	12.8	1.86	5.66	3.63	4.09
ENSCSAG00000000182	ENSCSAT00000018353	0	0	0	0	0	0	0	0	0	0	0	0	0
ENSCSAG00000000183	ENSCSAT00000018352	10.51	16.63	16.46	16.07	14.56	5.16	9.43	7.34	26.62	14.53	10.6	11.51	19.9
ENSCSAG00000000184	ENSCSAT00000018351	0	0	0	0	0	0	0	0	0	0	0	0	0
ENSCSAG00000000185	ENSCSAT00000018350	0	0	0	0	0	1	0	0	0	1	0	0	0
ENSCSAG00000000186	ENSCSAT00000018349	614	619	692	640	543	423	401	529	596	655	653	548	760
ENSCSAG00000000187	ENSCSAT00000018348	501	489	534	493	564	499	364	450	1034	368	348	342	671
ENSCSAG00000000188	ENSCSAT00000018347	9	9	13	8	10	10	9	23	9	10	12	14	26
ENSCSAG00000000189	ENSCSAT00000018346	43.97	39.38	35.68	52.59	28.37	23.75	19.97	26.71	51.05	21.28	14.37	17.76	36
ENSCSAG00000000190	ENSCSAT00000018345	0	0	0	0	0	0	0	0	0	3	1	2	3
ENSCSAG00000000191	ENSCSAT00000018344	19	19	16	13	16	22	33	43	52	63	75	58	120
ENSCSAG00000000192	ENSCSAT00000018343	0	0	0	0	0	0	0	0	0	0	0	0	0
ENSCSAG00000000193	ENSCSAT00000018342	4	6	4	5	5	4	5	9	11	4	6	5	11
ENSCSAG00000000194	ENSCSAT00000018341	15	8	13	11	11	0	0	1	0	29	38	32	20
ENSCSAG00000000195	ENSCSAT00000018340	0	0	0	0	0	0	0	0	0	0	0	0	0
ENSCSAG00000000196	ENSCSAT00000018339	0	0	0	0	0	0	0	0	0	0	0	0	0
ENSCSAG00000000197	ENSCSAT00000018338	0	0	0	0	0	0	0	0	0	0	0	0	0
ENSCSAG00000000198	ENSCSAT00000018337	22	23	20	24	16	59	48	72	58	15	17	14	17
ENSCSAG00000000199	ENSCSAT00000018336	590	566	624	545	447	1539	1223	1801	1517	1744	2028	1613	2063
ENSCSAG00000000200	ENSCSAT00000018335	0	1	0	0	0	2	2	4	1	1	4	2	2
ENSCSAG00000000201	ENSCSAT00000018334	3.38	3.06	2.2	2.07	3.69	4.08	1.04	1.04	8.25	4.16	2.04	5.1	3.87
ENSCSAG00000000202	ENSCSAT00000018333	0	0	0	0	0	0	0	0	0	0	0	0	0
ENSCSAG00000000203	ENSCSAT00000018332	0	0	0	0	0	0	0	0	0	0	0	0	0
ENSCSAG00000000204	ENSCSAT00000018331	0	0	0	0	0	0	0	0	0	0	0	0	0
ENSCSAG00000000205	ENSCSAT00000018330	1	3	4	5	6	7	7	11	9	1	2	1	1
ENSCSAG00000000206	ENSCSAT00000018329	43	36.62	34.54	34.21	44	82.25	78.64	67.7	110	84.92	85.63	63.89	140.01
ENSCSAG00000000207	ENSCSAT00000018328	0	0	0	0	0	0	0	1	0	0	0	0	0
ENSCSAG00000000208	ENSCSAT00000018327	0	0	0	0	0	0	0	0	0	0	0	0	0
ENSCSAG00000000209	ENSCSAT00000018326	694	690	792	633	767	643	502	770	515	457	518	478	413
ENSCSAG00000000210	ENSCSAT00000018325	176	191	170	176	184	151	122	204	182	155	169	129	219
ENSCSAG00000000211	ENSCSAT00000018324	263	309	324	284	405	243	208	284	300	220	227	199	192
ENSCSAG00000000212	ENSCSAT00000018323	0	0	0	0	1	0	1	2	1	24	26	25	20
ENSCSAG00000000213	ENSCSAT00000018322	19	24	17	14	27	31	19	21	44	19	28	13	36
ENSCSAG00000000214	ENSCSAT00000018321	0	1	0	0	1	0	0	1	0	0	0	0	0
ENSCSAG00000000215	ENSCSAT00000018320	21	8	21	20	20	10	3	13	6	0	4	1	0
ENSCSAG00000000216	ENSCSAT00000018319	37	34	34	27	33	28	23	40	26	63	67	54	105
ENSCSAG00000000217	ENSCSAT00000018318	3	0	5.16	2.88	4.12	4.02	3.24	5.05	5.21	5.08	2.02	0	2.23
ENSCSAG00000000218	ENSCSAT00000018317	1	0	0	1	0	0	0	0	0	0	0	0	0
ENSCSAG00000000219	ENSCSAT00000018316	2	5	4	2	10.92	4.4	9	6	3	5	11	10	10
ENSCSAG00000000220	ENSCSAT00000018315	1	0	0	1	0	1	0	0	2	0	0	0	0
ENSCSAG00000000221	ENSCSAT00000018314	5	3	2	2	5.08	5.6	6	11	9	7	7	5	4
ENSCSAG00000000222	ENSCSAT00000018313	1	0	0	0	0	1	0	1	0	0	0	0	0
ENSCSAG00000000223	ENSCSAT00000018312	0	0	0	0	1	0	0	0	0	0	0	0	0
ENSCSAG00000000224	ENSCSAT00000018311	0	0	0	0	0	0	0	0	0	0	0	0	0
ENSCSAG00000000225	ENSCSAT00000018310	0	0	0	0	0	1	1	0	0	0	0	0	0
ENSCSAG00000000226	ENSCSAT00000018309	0	0	0	0	0	0	0	0	0	0	0	0	0
ENSCSAG00000000227	ENSCSAT00000018308	378	368	409	379	324	158	139	206	62	80	87	96	53
ENSCSAG00000000228	ENSCSAT00000018307	0	0	0	0	0	2	0	1	1	24	28	22	6
ENSCSAG00000000229	ENSCSAT00000018306	0	0	0	0	0	0	0	0	0	0	0	0	0
ENSCSAG00000000230	ENSCSAT00000018305	2.15	0	1.23	1.11	0	0	1.2	1.52	1.34	1.08	1.2	0	2.49
ENSCSAG00000000231	ENSCSAT00000018304	1.01	1.01	0	0	0	0	0	0	0	0	0	0	0
ENSCSAG00000000232	ENSCSAT00000018303	0	0	0	0	0	0	0	0	0	0	0	0	0
ENSCSAG00000000233	ENSCSAT00000018302	2	5	3	1	2	3	2	4	3	2	0	0	0
ENSCSAG00000000234	ENSCSAT00000018301	0	1	2	2	1	2	2	2	1	3	1	6	1
ENSCSAG00000000235	ENSCSAT00000018300	93	100	82	82	81	69	60	101	150	64	66	45	108
ENSCSAG00000000236	ENSCSAT00000018299	113	128	132	136	144	105	125	136	209	215	202	176	339
ENSCSAG00000000237	ENSCSAT00000018298	0	0	0	0	0	0	1	3	1	0	0	0	0
ENSCSAG00000000238	ENSCSAT00000018297	36.77	28.24	43.01	44.43	34.09	24.61	27.24	31.73	36.35	12.44	12.57	15.2	44.14
ENSCSAG00000000239	ENSCSAT00000018296	67	57	72	72	73	50	45	69	92	49	52	58	68
ENSCSAG00000000240	ENSCSAT00000018295	1	1	0	0	0	0	0	0	0	1	0	0	0
ENSCSAG00000000241	ENSCSAT00000018294	0	0	0	0	0	0	0	1	0	0	0	0	0
ENSCSAG00000000242	ENSCSAT00000018293	0	0	0	0	0	0	0	0	0	0	0	0	0
ENSCSAG00000000243	ENSCSAT00000018292	0	0	0	0	0	0	0	0	0	0	0	0	0
ENSCSAG00000000244	ENSCSAT00000018291	1829	1840	2027	1769	1889	1481	1049	1432	3010	1007	1182	883	2086
ENSCSAG00000000245	ENSCSAT00000018290	4049	4107	4396	4441	5319	3461	2654	3542	5636	2604	2741	2238	3597
ENSCSAG00000000246	ENSCSAT00000018289	2.04	2.84	3.03	7.1	5.05	2.01	2.03	3.94	3.05	3.04	3.05	4.05	2.03
ENSCSAG00000000247	ENSCSAT00000018288	0	0	0	0	0	0	0	0	0	0	0	0	0
ENSCSAG00000000248	ENSCSAT00000018287	0	0	0	0	0	0	0	0	0	0	0	1	0
ENSCSAG00000000249	ENSCSAT00000018286	3866	3834.36	3897.69	3793.31	4787	2267	1903.28	2502.31	2956	2806	3008	2634	3458
ENSCSAG00000000250	ENSCSAT00000018285	660	630	672	640	635	492	352	528	383	483	520	444	427
ENSCSAG00000000251	ENSCSAT00000018284	0	0	0	0	0	0	0	0	0	0	0	0	0
ENSCSAG00000000252	ENSCSAT00000018283	0	0	0	0	0	0	0	0	0	0	0	0	0
ENSCSAG00000000253	ENSCSAT00000018282	30	38	42	33	32	26	29	37	61	75	67	52	107
ENSCSAG00000000254	ENSCSAT00000018281	52	45	36	46	38	42	44	61	2	11	4	8	0
ENSCSAG00000000255	ENSCSAT00000018280	324	358	329	293	220	277	246	349	29	210	174	176	63
ENSCSAG00000000256	ENSCSAT00000018279	0	0	0	0	0	0	0	0	0	0	0	0	0
ENSCSAG00000000257	ENSCSAT00000018278	469	503	492	457	456	449	374	518	286	428	421	350	341
ENSCSAG00000000258	ENSCSAT00000018277	6	7	7	11	8	14	10	33	15	2	1	0	1
ENSCSAG00000000259	ENSCSAT00000018276	20	20	18	20	22	22	16	18	45	7	7	6	14
ENSCSAG00000000260	ENSCSAT00000018275	1	0	0	0	0	0	0	0	0	0	0	0	0
ENSCSAG00000000261	ENSCSAT00000018274	28	24	30	27	39	25	31	39	41	31	44	41	44
ENSCSAG00000000262	ENSCSAT00000018273	8	6.01	3.99	10	2.94	3	4	4	2	3	2	0	2
ENSCSAG00000000263	ENSCSAT00000018272	1	2	0	2	0	1	0	0	0	4	4	1	3
ENSCSAG00000000264	ENSCSAT00000018271	0	0	0	0	0	0	0	0	0	0	0	0	0
ENSCSAG00000000265	ENSCSAT00000018270	84	87	92	77	47	54	38	58	36	100	103	98	91
ENSCSAG00000000266	ENSCSAT00000018269	0	0	0	0	0	0	0	0	0	0	0	0	0
ENSCSAG00000000267	ENSCSAT00000018268	1	0	1	1	0	0	1	1	0	0	0	0	0
ENSCSAG00000000268	ENSCSAT00000018267	0	0	0	0	0	0	0	0	0	0	0	0	0
ENSCSAG00000000269	ENSCSAT00000018266	16	10	4	5	11	5	6	10	6	3	1	4	5
ENSCSAG00000000270	ENSCSAT00000018265	0	0	1	0	0	0	0	0	0	0	0	0	0
ENSCSAG00000000271	ENSCSAT00000018264	22	29.93	19.2	32	43	36	32	48	55	19	24.18	22	45
ENSCSAG00000000272	ENSCSAT00000018263	0	0.5	0	2	1	1	2	1	1	0	1	1	2
ENSCSAG00000000273	ENSCSAT00000018262	0	0.5	0	0	0	0	0	0	0	0	0	0	0
ENSCSAG00000000274	ENSCSAT00000018261	0	0	0	2	0	0	0	0	1	0	0	0	0
ENSCSAG00000000275	ENSCSAT00000018260	0	0	0	0	0	0	0	0	0	0	0	0	0
ENSCSAG00000000276	ENSCSAT00000018259	0	0	0	0	0	0	0	0	0	0	0	0	0
ENSCSAG00000000277	ENSCSAT00000018258	2	2	1	8	2	1	0	1	0	0	0	0	0
ENSCSAG00000000278	ENSCSAT00000018257	0	0	0	0	0	0	0	0	0	0	0	0	0
ENSCSAG00000000279	ENSCSAT00000018256	184	232	243	208	238	173	124	184	65	171	182	154	109
ENSCSAG00000000280	ENSCSAT00000018255	5	2.57	2.11	12.5	3.39	6.02	0	4.01	8.63	5.01	0	1	2
ENSCSAG00000000281	ENSCSAT00000018254	0	0	0	0	0	0	0	0	0	0	0	0	0
ENSCSAG00000000282	ENSCSAT00000018253	0	0	1	0	1	1	0	2	0	0	0	0	0
ENSCSAG00000000283	ENSCSAT00000018252	0	0	0	0	0	0	0	0	0	0	0	0	0
ENSCSAG00000000284	ENSCSAT00000018251	0	0	0	0	0	0	0	0	0	0	0	0	0
ENSCSAG00000000285	ENSCSAT00000018250	1	0	0	3	0	2	1	2.83	2	0	0	0	2
ENSCSAG00000000286	ENSCSAT00000018249	1516.61	1491.17	1636.53	1818.01	1810.32	1121.23	893.68	1050.28	2914.27	663.67	664.48	531.6	1443.38
ENSCSAG00000000287	ENSCSAT00000018248	0	0	0	0	0	0	0	0	0	0	0	0	0
ENSCSAG00000000288	ENSCSAT00000018247	0	0	0	0	0	0	0	0	0	0	0	1	0
ENSCSAG00000000289	ENSCSAT00000018246	169	165	206	163	183	251	217	265	303	503	637	549	950
ENSCSAG00000000290	ENSCSAT00000018245	0	0	0	0	0	0	0	0	0	0	0	0	0
ENSCSAG00000000291	ENSCSAT00000018244	3	2	2	5	1	0	0	1	2	3	3	2	1
ENSCSAG00000000292	ENSCSAT00000018243	0	0	0	0	0	0	0	0	1	0	0	0	0
ENSCSAG00000000293	ENSCSAT00000018242	0	0	0	0	0	0	0	0	0	0	0	0	0
ENSCSAG00000000294	ENSCSAT00000018241	91	93	113	88	126.48	129.41	121	163	171	160	132	120	189
ENSCSAG00000000295	ENSCSAT00000018240	683	620	745	653	871.52	804.59	708	927	1062	1135	1174	1025	1708
ENSCSAG00000000296	ENSCSAT00000018239	0	0	4	2	1	0	3	2	2	9	8	8	9
ENSCSAG00000000297	ENSCSAT00000018238	4	7	5	0	3	1	0	0	0	1	0	0	0
ENSCSAG00000000298	ENSCSAT00000018237	25	19	21	19	20	63	44	59	65	19	18	9	32
ENSCSAG00000000299	ENSCSAT00000018236	2	0	0	0	0	0	0	1	0	0	1	0	1
ENSCSAG00000000300	ENSCSAT00000018235	0	0	0	0	0	0	0	0	0	0	0	0	0
ENSCSAG00000000301	ENSCSAT00000018234	8.17	0	1.62	5.19	3.23	3.33	1.65	9.51	5.84	0	3.04	1.85	1.66
ENSCSAG00000000302	ENSCSAT00000018233	1	0	0	0	1	0	0	0	0	0	0	0	1
ENSCSAG00000000303	ENSCSAT00000018232	0	0	0	0	0	0	0	0	1	0	0	0	0
ENSCSAG00000000304	ENSCSAT00000018231	0	0	0	0	0	0	0	0	0	0	0	0	0
ENSCSAG00000000305	ENSCSAT00000018230	0	0	0	0	0	0	0	0	0	0	0	0	0
ENSCSAG00000000306	ENSCSAT00000018229	2.11	0	2.09	2.1	2.09	0	0	0	1.05	1.06	2.11	2.05	2.1
ENSCSAG00000000307	ENSCSAT00000018228	2	2	2	0	1	1	0	2	2	5	0	3	7
ENSCSAG00000000308	ENSCSAT00000018227	0	1	0	0	0	0	0	0	0	0	0	0	0
ENSCSAG00000000309	ENSCSAT00000018226	0	0	0	0	0	0	0	0	0	0	0	0	0
ENSCSAG00000000310	ENSCSAT00000018225	0	0	0	0	0	0	0	0	0	0	0	0	0
ENSCSAG00000000311	ENSCSAT00000018224	0	0	0	0	0	0	0	0	0	0	0	0	0
ENSCSAG00000000312	ENSCSAT00000018223	1499.8	1452.85	1525.76	1376.37	1450	1106.61	796.55	1055.4	2313.64	1419.65	1538.52	1221.25	2784.8
ENSCSAG00000000313	ENSCSAT00000018222	11	16	7	11	4	7	9	4	5	5	2	2	7
ENSCSAG00000000314	ENSCSAT00000018221	0	0	0	0	0	0	0	0	0	0	0	0	0
ENSCSAG00000000315	ENSCSAT00000018220	10	10	14	12	17	30	19	30	32	18	14	9	21
ENSCSAG00000000316	ENSCSAT00000018219	1874.88	1946	1972.95	1920.95	2261	1995.93	1360	1881	2349.93	1934.94	1944	1690.93	2304
ENSCSAG00000000317	ENSCSAT00000018218	58	44	52	57	58	92	55	110	108	95	76	86	156
ENSCSAG00000000318	ENSCSAT00000018217	0	0	0	0	0	0	0	0	0	0	0	0	0
ENSCSAG00000000319	ENSCSAT00000018216	11	7	12	10	4	15	10	14	10	1	4	2	4
ENSCSAG00000000320	ENSCSAT00000018215	250	240	234	229	244	235	177	260	462	318	291	282	537
ENSCSAG00000000321	ENSCSAT00000018214	0	0	0	0	0	0	0	0	0	0	0	0	0
ENSCSAG00000000322	ENSCSAT00000018213	208	238	254	260	240	174	138	209	360	362	373	319	685
ENSCSAG00000000323	ENSCSAT00000018212	0	0	0	0	0	0	0	0	0	0	0	0	0
ENSCSAG00000000324	ENSCSAT00000018211	0	0	0	0	0	0	0	0	0	0	0	0	0
ENSCSAG00000000325	ENSCSAT00000018210	13	30	22	20	35	47	24	50	18	6	13	10	10
ENSCSAG00000000326	ENSCSAT00000018209	208	198	193	217	196	141	122	179	190	210	215	177	261
ENSCSAG00000000327	ENSCSAT00000018208	0	0	0	0	0	0	0	0	0	0	0	0	0
ENSCSAG00000000328	ENSCSAT00000018207	14	8	9	12	11	4	3	6	8	1	1	1	4
ENSCSAG00000000329	ENSCSAT00000018206	301	314	320	304	346	369	250	359	350	409	408	383	482
ENSCSAG00000000330	ENSCSAT00000018205	122	140	139	112	111	129	86	122	145	99	89	75	134
ENSCSAG00000000331	ENSCSAT00000018204	0	1	0	0	2	1	2	0	1	0	0	0	1
ENSCSAG00000000332	ENSCSAT00000018203	66.42	66.17	49.96	59.26	82.4	46.43	28.28	49.16	70.5	26.72	29.4	29.01	59.71
ENSCSAG00000000333	ENSCSAT00000018202	0	0	0	0	0	0	0	0	0	0	0	0	0
ENSCSAG00000000334	ENSCSAT00000018201	0	0	0	0	0	0	0	0	0	0	0	0	0
ENSCSAG00000000335	ENSCSAT00000018200	0	0	0	0	0	0	0	0	0	0	0	0	0
ENSCSAG00000000336	ENSCSAT00000018199	0	0	0	0	0	0	0	0	0	0	0	0	0
ENSCSAG00000000337	ENSCSAT00000018198	0	1.01	1.01	2.05	0	1.01	1	0	2.03	0	0	1.02	0
ENSCSAG00000000338	ENSCSAT00000018197	0	0	0	0	0	0	0	0	0	0	0	0	0
ENSCSAG00000000339	ENSCSAT00000018196	0	0	0	0	0	0	0	0	0	0	0	0	0
ENSCSAG00000000340	ENSCSAT00000018195	0	0	0	0	0	0	0	0	0	0	0	0	0
ENSCSAG00000000341	ENSCSAT00000018194	0	0	0	0	0	0	0	0	0	0	0	0	0
ENSCSAG00000000342	ENSCSAT00000018193	0	0	0	0	0	0	0	0	0	0	0	0	0
ENSCSAG00000000343	ENSCSAT00000018192	0	0	0	0	0	0	0	0	0	0	1	0	0
ENSCSAG00000000344	ENSCSAT00000018191	0	0	0	0	0	0	0	0	0	7	9	3	12
ENSCSAG00000000345	ENSCSAT00000018190	0	0	0	0	0	0	0	0	0	0	0	0	0
ENSCSAG00000000346	ENSCSAT00000018189	0	0	0	0	0	0	0	0	0	0	0	0	0
ENSCSAG00000000347	ENSCSAT00000018188	0	0	0	0	0	0	0	0	0	0	0	0	0
ENSCSAG00000000348	ENSCSAT00000018187	0	0	0	0	0	0	0	0	0	0	0	0	0
ENSCSAG00000000349	ENSCSAT00000018186	318	342	321	372	349	244	227	268	521	235	221	199	478
ENSCSAG00000000350	ENSCSAT00000018185	0	0	0	0	0	0	0	0	0	0	0	1	0
ENSCSAG00000000351	ENSCSAT00000018184	0	0	0	0	0	0	0	0	0	0	0	0	0
ENSCSAG00000000352	ENSCSAT00000018183	0	0	0	0	0	0	0	0	0	0	0	0	0
ENSCSAG00000000353	ENSCSAT00000018182	4	5	9	8	6	15	3	11	17	19	15	16	30
ENSCSAG00000000354	ENSCSAT00000018181	0	0	0	0	0	0	0	0	0	0	0	0	0
ENSCSAG00000000355	ENSCSAT00000018180	0	0	0	0	0	0	0	0	0	0	0	0	0
ENSCSAG00000000356	ENSCSAT00000018179	0	0	0	0	0	0	0	0	0	0	0	0	0
ENSCSAG00000000357	ENSCSAT00000018178	0	0	0	0	0	0	0	0	0	0	0	0	0
ENSCSAG00000000358	ENSCSAT00000018177	0	0	0	0	0	0	0	0	0	0	0	0	0
ENSCSAG00000000359	ENSCSAT00000018176	0	0	0	0	0	0	0	0	0	0	0	0	0
ENSCSAG00000000360	ENSCSAT00000018175	0	0	0	0	0	0	0	0	0	0	0	0	0
ENSCSAG00000000361	ENSCSAT00000018174	0	0	0	0	0	0	0	0	0	0	0	0	0
ENSCSAG00000000362	ENSCSAT00000018173	0	0	0	0	0	0	0	0	0	0	0	0	0
ENSCSAG00000000363	ENSCSAT00000018172	0	0	0	0	0	0	0	0	0	0	0	0	0
ENSCSAG00000000364	ENSCSAT00000018171	0	0	0	0	0	0	0	0	0	0	0	0	0
ENSCSAG00000000365	ENSCSAT00000018170	21	21	31	17	21	19	5	23	27	16	16	18	24
ENSCSAG00000000366	ENSCSAT00000018169	0	0	0	0	0	0	0	0	0	0	0	0	0
ENSCSAG00000000367	ENSCSAT00000018168	37	62	41	40	58	33	28	37	39	79	87	88	125
ENSCSAG00000000368	ENSCSAT00000018167	24	36	49	31	29	51	25	46	30	36	42	42	32
ENSCSAG00000000369	ENSCSAT00000018166	7778.04	7642.33	8167.57	7847.9	7810.86	5143.37	4045	5260.1	8750.7	3955.69	4180.6	3558.07	6969.14
ENSCSAG00000000370	ENSCSAT00000018165	0	1	1	0	0	0	0	0	0	0	0	0	0
ENSCSAG00000000371	ENSCSAT00000018164	0	2	2	0	0	2	0	0	0	9	10	15	12
ENSCSAG00000000372	ENSCSAT00000018163	6	13	13	8	10	6	6	6	8	7	10	7	20.03
ENSCSAG00000000373	ENSCSAT00000018162	0	1	0	1	0	0	0	0	0	0	0	0	0
ENSCSAG00000000374	ENSCSAT00000018161	0	0	0	0	0	0	0	1	3	0	1	0	1
ENSCSAG00000000375	ENSCSAT00000018160	42	31	48	45	33	81	61	75	40	489	486	404	487
ENSCSAG00000000376	ENSCSAT00000018159	17	14	23	17	12	30	30	38	16	176	168	171	198
ENSCSAG00000000377	ENSCSAT00000018158	0	0	0	0	0	0	0	0	0	0	0	0	0
ENSCSAG00000000378	ENSCSAT00000018157	131	121	125	122	181	174	153	173	226	383	339	288	496
ENSCSAG00000000379	ENSCSAT00000018156	847	766	783	813	1032	446	358	448	542	1207	1379	1199	2093
ENSCSAG00000000380	ENSCSAT00000018155	0	0	0	0	0	0	0	0	0	0	0	0	0
ENSCSAG00000000381	ENSCSAT00000018154	56	53	60	46	46	48	28	41	22	24	48	23	17
ENSCSAG00000000382	ENSCSAT00000018153	27	33	31	31	37	24	15	33	23	2	2	0	3
ENSCSAG00000000383	ENSCSAT00000018152	0	0	0	0	0	0	0	0	0	0	0	0	0
ENSCSAG00000000384	ENSCSAT00000018151	0	0	0	0	0	0	0	0	0	0	0	0	0
ENSCSAG00000000385	ENSCSAT00000018150	137	169	170	175	123	238	190	268	246	197	223	188	216
ENSCSAG00000000386	ENSCSAT00000018149	9	10	10	10	11	13	16	20	24	8	7	4	9
ENSCSAG00000000387	ENSCSAT00000018148	3.79	2.06	5.92	3.29	4.95	1	1	4.3	9	0	2.88	1	2.05
ENSCSAG00000000388	ENSCSAT00000018147	0	1	0	0	2	2	0	0	3.01	0	3	0	0
ENSCSAG00000000389	ENSCSAT00000018146	1	1	1	0	1	1	0	0	3	0	0	1	0
ENSCSAG00000000390	ENSCSAT00000018145	0	0	0	0	0	0	0	0	0	0	0	0	0
ENSCSAG00000000391	ENSCSAT00000018144	0	1	1	3	1	0	1	1	2	2	2	2	2
ENSCSAG00000000392	ENSCSAT00000018143	11.05	6.01	8.08	6.36	5.05	6.05	10.04	7.07	8.05	2.01	7.04	3.01	7.06
ENSCSAG00000000393	ENSCSAT00000018142	1	3	4	1	5	24	11	12	14	6	4	3	8
ENSCSAG00000000394	ENSCSAT00000018141	77	56	66	77	71	95	74	110	83	93	104	99	166
ENSCSAG00000000395	ENSCSAT00000018140	599	587	655	633	620	473	362	492	895	545	598	499	796
ENSCSAG00000000396	ENSCSAT00000018139	0	0	0	0	0	0	0	0	0	0	0	0	0
ENSCSAG00000000397	ENSCSAT00000018138	16	10	7	15	12	11	6	12	30	11	17	10	36
ENSCSAG00000000398	ENSCSAT00000018137	12.14	3.36	5.22	8.4	4.94	7.98	5.02	1.27	15.98	3.45	1.63	13.55	18.78
ENSCSAG00000000399	ENSCSAT00000018136	0	0	0	1	0	0	0	1	0	0	0	0	0
ENSCSAG00000000400	ENSCSAT00000018135	79.49	76.31	85.78	72.52	133.14	215.36	160.6	200.55	459.28	74.82	87.96	92.46	115.87
ENSCSAG00000000401	ENSCSAT00000018134	9	4	5	9	8	5	2	6	3	1	0	0	1
ENSCSAG00000000402	ENSCSAT00000018133	21.17	17.38	25.17	18.54	13.17	21.27	14.26	24.67	38.38	16.18	17.08	7	23.7
ENSCSAG00000000403	ENSCSAT00000018132	289.81	288.21	296.46	299.09	284.99	146.2	109.41	151.65	316.4	2.55	3.94	11.36	17.96
ENSCSAG00000000404	ENSCSAT00000018131	0	0	0	1	0	0	1	0	0	3	3	3	0
ENSCSAG00000000405	ENSCSAT00000018130	1	0	0	0	0	0	0	1	0	0	0	0	0
ENSCSAG00000000406	ENSCSAT00000018129	0	2.08	4.06	6.3	3.2	7.54	4.12	5.36	3.39	2.05	0	2.05	0
ENSCSAG00000000407	ENSCSAT00000018128	0	0	0	0	0	0	0	0	0	0	0	0	0
ENSCSAG00000000408	ENSCSAT00000018127	0	0	0	0	0	0	0	0	0	1	0	0	0
ENSCSAG00000000409	ENSCSAT00000018126	105	105	98	109	60	21	39	43	6	95	80	67	38
ENSCSAG00000000410	ENSCSAT00000018125	47	59	52	43	65	54	48	59	44	42	48	55	52
ENSCSAG00000000411	ENSCSAT00000018124	25	32	35	30	35	22	17	32	29	8	8	7	19
ENSCSAG00000000412	ENSCSAT00000018123	1	0	0	0	0	0	0	0	0	0	0	1.02	0
ENSCSAG00000000413	ENSCSAT00000018122	262	271	322	296	265	235	157	220	433	223	274	224	432
ENSCSAG00000000414	ENSCSAT00000018121	0	0	0	0	0	0	0	0	0	0	0	0	0
ENSCSAG00000000415	ENSCSAT00000018120	0	0	0	1.61	0	0	0	1.04	0	0	1.04	0	0
ENSCSAG00000000416	ENSCSAT00000018119	0	0	0	0	0	0	0	0	0	0	0	0	0
ENSCSAG00000000417	ENSCSAT00000018118	0	0	0	0	0	0	0	0	0	0	0	0	0
ENSCSAG00000000418	ENSCSAT00000018117	0	0	1	5	1	1	0	0	1	10	6	9	6
ENSCSAG00000000419	ENSCSAT00000018116	154.68	135.48	184.02	124.76	144.52	120.52	79.13	107.56	212.47	67.21	79.97	53.52	149.42
ENSCSAG00000000420	ENSCSAT00000018115	559	620	587	562	704	438	362	513	651	473	484	427	595
ENSCSAG00000000421	ENSCSAT00000018114	0	0	0	0	0	0	0	0	0	0	0	0	1
ENSCSAG00000000422	ENSCSAT00000018113	3	3	3	4	1	5	4	5	15	3	3	2	6
ENSCSAG00000000423	ENSCSAT00000018112	37	36	46	35	35	17	11	14	18	2	5	0	1
ENSCSAG00000000424	ENSCSAT00000018111	0	0	0	1	0	1	0	0	0	0	0	0	0
ENSCSAG00000000425	ENSCSAT00000018110	2	0	0	0	0	2	3	4	2	5	1	8	3
ENSCSAG00000000426	ENSCSAT00000018109	0	0	0	0	0	0	0	0	0	0	0	0	0
ENSCSAG00000000427	ENSCSAT00000018108	1106.9	1144.09	1217.25	1224.35	1233.21	846.43	609.29	786.83	1533.88	851.27	827.61	717.71	1632.75
ENSCSAG00000000428	ENSCSAT00000018107	1	1	0	1	0	0	0	0	0	0	0	0	0
ENSCSAG00000000429	ENSCSAT00000018106	0	0	0	0	0	0	0	0	0	0	0	0	0
ENSCSAG00000000430	ENSCSAT00000018105	0	0	0	0	0	0	0	0	0	0	0	0	0
ENSCSAG00000000431	ENSCSAT00000018104	0	0	0	0	0	0	0	0	0	0	0	0	0
ENSCSAG00000000432	ENSCSAT00000018103	0	0	0	0	0	0	0	0	0	0	0	0	0
ENSCSAG00000000433	ENSCSAT00000018102	0	0	0	0	0	0	0	0	0	0	0	0	0
ENSCSAG00000000434	ENSCSAT00000018101	0	0	0	0	0	0	0	0	0	0	0	0	0
ENSCSAG00000000435	ENSCSAT00000018100	0	0	0	0	0	0	0	0	0	0	0	0	0
ENSCSAG00000000436	ENSCSAT00000018099	0	0	0	0	0	0	0	0	0	0	0	0	0
ENSCSAG00000000437	ENSCSAT00000018098	0	0	0	0	0	0	0	0	0	0	0	0	0
ENSCSAG00000000438	ENSCSAT00000018097	0	0	0	0	0	0	0	0	0	0	0	0	0
ENSCSAG00000000439	ENSCSAT00000018096	0	0	0	0	0	0	0	0	0	0	0	0	0
ENSCSAG00000000440	ENSCSAT00000018095	0	0	0	0	0	0	0	0	0	0	0	0	0
ENSCSAG00000000441	ENSCSAT00000018094	0	0	0	0	0	0	0	0	0	0	0	0	0
ENSCSAG00000000442	ENSCSAT00000018093	3	3	3	5	2	9	4	5	3	6	1	2	3
ENSCSAG00000000443	ENSCSAT00000018092	0	0	0	0	0	0	0	0	0	0	0	0	0
ENSCSAG00000000444	ENSCSAT00000018091	19619.3	19257.5	20508.3	18700.8	28221.8	14320.2	12240.6	16260.6	18460	14940.1	15476.7	13601.5	18017.4
ENSCSAG00000000445	ENSCSAT00000018090	0	0	0	0	0	0	0	0	0	0	0	0	0
ENSCSAG00000000446	ENSCSAT00000018089	0	0	0	0	0	0	0	0	0	0	0	0	0
ENSCSAG00000000447	ENSCSAT00000018088	110	104	97	94	96	88	66	92	47	149	133	148	138
ENSCSAG00000000448	ENSCSAT00000018087	7	0	2	0	3	2	5	2	3	1	2	1	6
ENSCSAG00000000449	ENSCSAT00000018086	108	92	125	127	136	96	83	122	205	109	102	89	160
ENSCSAG00000000450	ENSCSAT00000018085	0	1	0	0	0	1	0	0	0	2	0	0	0
ENSCSAG00000000451	ENSCSAT00000018084	9	4	10	7	8	19	8	16	17	18	29	21	35
ENSCSAG00000000452	ENSCSAT00000018083	0	0	0	0	0	0	0	0	0	0	0	0	0
ENSCSAG00000000453	ENSCSAT00000018082	0	0	0	0	0	0	0	0	0	0	0	0	0
ENSCSAG00000000454	ENSCSAT00000018081	0	0	0	0	0	0	0	0	0	1	0	0	0
ENSCSAG00000000455	ENSCSAT00000018080	0	0	0	0	0	0	0	0	0	0	0	0	0
ENSCSAG00000000456	ENSCSAT00000018079	93	124	105	120	116	136	99	133	56	120	102	94	96
ENSCSAG00000000457	ENSCSAT00000018078	104.92	83.93	84.48	83.39	91.86	112.77	97.97	120.24	102.94	106.89	99.79	80.99	110.95
ENSCSAG00000000458	ENSCSAT00000018077	337	360	374	346	413	274	252	311	348	482	509	443	597
ENSCSAG00000000459	ENSCSAT00000018076	8	3	7	2	2	3	4	2	4	3	0	2	2
ENSCSAG00000000460	ENSCSAT00000018075	203	181	191	183	186	168	163	239	143	167	186	155	206
ENSCSAG00000000461	ENSCSAT00000018074	0	0	0	0	0	0	0	0	0	0	0	0	0
ENSCSAG00000000462	ENSCSAT00000018073	0	0	0	0	0	0	0	0	0	0	0	0	0
ENSCSAG00000000463	ENSCSAT00000018072	0	0	0	0	0	0	0	0	0	0	0	0	0
ENSCSAG00000000464	ENSCSAT00000018071	0	0	0	0	0	0	0	0	0	0	0	0	0
ENSCSAG00000000465	ENSCSAT00000018070	0	0	0	0	0	0	0	0	0	0	0	0	0
ENSCSAG00000000466	ENSCSAT00000018069	2	1	1	0	1	0	1	3	1	0	0	0	0
ENSCSAG00000000467	ENSCSAT00000018068	2	1	5	3	1	10	5	9	6	2	2	1	6
ENSCSAG00000000468	ENSCSAT00000018067	11	6	7	6	7	13	5	6	13	6	7	5	5
ENSCSAG00000000469	ENSCSAT00000018066	0	0	0	0	0	0	0	0	0	0	0	0	0
ENSCSAG00000000470	ENSCSAT00000018065	0	0	0	0	0	0	0	0	0	1	0	0	0
ENSCSAG00000000471	ENSCSAT00000018064	4	3	1	2	0	0	0	2	0	0	0	0	0
ENSCSAG00000000472	ENSCSAT00000018063	0	0	0	0	0	0	0	0	0	0	0	0	0
ENSCSAG00000000473	ENSCSAT00000018062	83	84	88	87	95	71	72	89	135	123	139	115	233
ENSCSAG00000000474	ENSCSAT00000018061	0	0	0	0	0	0	0	0	0	0	0	0	0
ENSCSAG00000000475	ENSCSAT00000018060	266	294	302	260	247	216	192	241	187	169	191	186	200
ENSCSAG00000000476	ENSCSAT00000018059	5824	5634	5993	5896	5656	5427	3663	4988	9708	3237	3473	2909	6317
ENSCSAG00000000477	ENSCSAT00000018058	286	312	298.67	337.9	313.8	247.92	186.77	266.9	443	204.8	206.88	138	393.89
ENSCSAG00000000478	ENSCSAT00000018057	2	0	0	1	0	1	0	0	0	0	0	0	0
ENSCSAG00000000479	ENSCSAT00000018056	0	0	0	0	0	1	0	0	0	0	0	0	0
ENSCSAG00000000480	ENSCSAT00000018055	8	18	5	12	8	7	7	8	6	7	8	2	8
ENSCSAG00000000481	ENSCSAT00000018054	0	0	0	0	1	0	0	0	0	0	0	0	0
ENSCSAG00000000482	ENSCSAT00000018053	0	2	3	0	0	2	0	0	1	1	0	0	1
ENSCSAG00000000483	ENSCSAT00000018052	116.48	124.08	153.44	126.92	120.85	107.53	81.89	89.89	172.85	107.25	104.99	99.16	223.65
ENSCSAG00000000484	ENSCSAT00000018051	1077	946	1073	1004	1047	1048	885	1123	1216	1057	1287	1030	1443
ENSCSAG00000000485	ENSCSAT00000018050	0	2	1	0	0	0	0	0	1	0	0	0	1
ENSCSAG00000000486	ENSCSAT00000018049	13	13	8	13	10	36	37.97	50	39.61	37	39	37	39.22
ENSCSAG00000000487	ENSCSAT00000018048	3	5	2	6	3	14	21.21	32.14	11.99	6	4	5	7
ENSCSAG00000000488	ENSCSAT00000018047	0	0	1	0	0	1	1	3	0	0	1	0	1
ENSCSAG00000000489	ENSCSAT00000018046	2	2	2	2	1	6	1	5	1	3	1	1	2
ENSCSAG00000000490	ENSCSAT00000018045	4.1	7	2	6	3	12.23	9.03	14.12	10.16	2	5.01	13.21	6.01
ENSCSAG00000000491	ENSCSAT00000018044	38.9	36	34	30	33	90.77	105	113.19	62.84	94.91	99.85	101.8	93.76
ENSCSAG00000000492	ENSCSAT00000018043	0	0	0	0	0	0	0	0	0	0	0	0	0
ENSCSAG00000000493	ENSCSAT00000018042	203	160	170	184	206	187	161	224	184	156	184	149	200
ENSCSAG00000000494	ENSCSAT00000018041	0	1	0	0	0	0	0	0	1	2	1	0	0
ENSCSAG00000000495	ENSCSAT00000018040	78	92	94	114	103	99	76	111	108	97	83	74	134
ENSCSAG00000000496	ENSCSAT00000018039	0	0	2	0	0	1	0	0	0	0	0	0	0
ENSCSAG00000000497	ENSCSAT00000018038	24	33	34	20	10	41	17	26	12	6	14	6	16
ENSCSAG00000000498	ENSCSAT00000018037	2265.41	2169.81	2377.8	2172.85	2229.52	1614.27	1244.1	1698.46	3374.43	1151.37	1227.42	921.06	2414.28
ENSCSAG00000000499	ENSCSAT00000018036	835	799	902	909	934	604	517	795	797	470	459	438	623
ENSCSAG00000000500	ENSCSAT00000018035	247	246	242	256	264	131	108	178	213	47	71	67	58
ENSCSAG00000000501	ENSCSAT00000018034	61	68	59	69	62	63	47	46	40	96	110	90	121
ENSCSAG00000000502	ENSCSAT00000018033	0	0	0	0	0	0	0	0	0	0	0	0	0
ENSCSAG00000000503	ENSCSAT00000018032	6	6	6	6	5	4	2	4	3	0	1	0	1
ENSCSAG00000000504	ENSCSAT00000018031	0	0	3	0	1	2	0	1	0	1	0	1	0
ENSCSAG00000000505	ENSCSAT00000018030	0	0	0	0	0	0	0	0	0	0	0	0	0
ENSCSAG00000000506	ENSCSAT00000018029	0	0	0	0	0	0	0	0	0	0	0	0	0
ENSCSAG00000000507	ENSCSAT00000018028	0	3.12	0	1.56	1.94	0	1.59	0	0	0	0	0	4.69
ENSCSAG00000000508	ENSCSAT00000018027	0	0	0	0	0	0	0	0	0	0	0	0	0
ENSCSAG00000000509	ENSCSAT00000018026	1	0	0	1	0	0	0	0	2	0	2	0	2
ENSCSAG00000000510	ENSCSAT00000018025	0	0	0	0	0	0	0	0	0	0	0	0	0
ENSCSAG00000000511	ENSCSAT00000018024	28	37	34	28	28	62	60	69	66	9	7	8	9
ENSCSAG00000000512	ENSCSAT00000018023	14	14	19	17	22	17	5	17	15	9	5	6	6
ENSCSAG00000000513	ENSCSAT00000018022	1	0	0	0	1	0	3	0	0	0	0	0	1
ENSCSAG00000000514	ENSCSAT00000018021	0	0	0	0	0	1	0	0	0	0	0	0	0
ENSCSAG00000000515	ENSCSAT00000018020	0	0	0	0	0	0	0	0	1	0	0	0	0
ENSCSAG00000000516	ENSCSAT00000018019	58	42	54	45	61	59	49	64	93	34	48	25	37
ENSCSAG00000000517	ENSCSAT00000018018	0	1	0	2	1	0	3	1	2	4	13	6	17
ENSCSAG00000000518	ENSCSAT00000018017	5	4	6	4	3	5	5	6	2	4	4	4	1
ENSCSAG00000000519	ENSCSAT00000018016	159	171	141.04	182	171	199	189	258	279.09	300	281	240	466
ENSCSAG00000000520	ENSCSAT00000018015	0	0	0	0	0	0	0	0.5	0.5	0	0	0	0
ENSCSAG00000000521	ENSCSAT00000018014	0	0	0	0	0	0	0	0.5	0.5	0	0	0	0
ENSCSAG00000000522	ENSCSAT00000018013	554	603	641	572	747	1007	767	1026	1022	1170	1194	1039	1566
ENSCSAG00000000523	ENSCSAT00000018012	48	44	37	52	45	42	23	35	61	43	45	45	83
ENSCSAG00000000524	ENSCSAT00000018011	0	0	0	0	0	0	0	0	0	0	0	0	0
ENSCSAG00000000525	ENSCSAT00000018010	13	9	16	8	16	3	4	4	2	7	7	6	12
ENSCSAG00000000526	ENSCSAT00000018009	0	0	0	0	0	0	0	0	0	0	0	0	0
ENSCSAG00000000527	ENSCSAT00000018008	0	0	0	0	0	0	0	0	0	0	0	0	0
ENSCSAG00000000528	ENSCSAT00000018007	0	0	0	1	0	0	0	0	0	0	0	0	0
ENSCSAG00000000529	ENSCSAT00000018006	0	0	0	0	0	0	0	0	0	0	0	0	1
ENSCSAG00000000530	ENSCSAT00000018005	0	0	0	0	0	0	0	0	0	0	0	0	0
ENSCSAG00000000531	ENSCSAT00000018004	0	0	0	0	0	0	0	0	0	0	0	0	1
ENSCSAG00000000532	ENSCSAT00000018003	535.49	589.96	468.99	518.65	659.15	363.5	278.77	381.91	492.53	283.03	249.84	208.64	361.77
ENSCSAG00000000533	ENSCSAT00000018002	218	170	200	194	241	240	157	231	239	173	177	167	196
ENSCSAG00000000534	ENSCSAT00000018001	0	0	0	0	0	0	1	0	0	42	59	38	117
ENSCSAG00000000535	ENSCSAT00000018000	0	0	0	0	0	0	0	0	0	1	0	0	1
ENSCSAG00000000536	ENSCSAT00000017999	0	0	0	0	0	0	0	0	0	0	0	0	0
ENSCSAG00000000537	ENSCSAT00000017998	0	0	0	0	0	0	0	0	0	0	0	0	0
ENSCSAG00000000538	ENSCSAT00000017997	12	9	7	10	8	3	3	5	6	12	21	9	6
ENSCSAG00000000539	ENSCSAT00000017996	48	51	49	46	43	45	34	65	56	32	36	39	49
ENSCSAG00000000540	ENSCSAT00000017995	3	5	8	6	7	14	11	7	15	6	5	5	7
ENSCSAG00000000541	ENSCSAT00000017994	643	614	698	631	890	1510	1253	1677	3115	1264	1443	1227	1833
ENSCSAG00000000542	ENSCSAT00000017993	206	217	211	190	173	260	183	301	329	262	223	188	288
ENSCSAG00000000543	ENSCSAT00000017992	45	57	57	45	60	58	44	64	41	46	40	36	47
ENSCSAG00000000544	ENSCSAT00000017991	0	0	0	0	0	0	0	0	0	0	0	0	0
ENSCSAG00000000545	ENSCSAT00000017990	0	0	0	0	0	0	0	0	0	0	0	0	0
ENSCSAG00000000546	ENSCSAT00000017989	0	0	0	0	0	0	0	0	0	0	0	0	0
ENSCSAG00000000547	ENSCSAT00000017988	0	0	1	0	0	0	0	0	0	0	1	0	0
ENSCSAG00000000548	ENSCSAT00000017987	1	0	0	0	1	0	0	1	1	0	0	1	2
ENSCSAG00000000549	ENSCSAT00000017986	0	0	0	0	0	0	0	0	0	0	0	0	0
ENSCSAG00000000550	ENSCSAT00000017985	0	0	0	0	0	0	0	0	0	0	0	0	0
ENSCSAG00000000551	ENSCSAT00000017984	0	1	0	0	0	0	0	0	0	0	0	0	0
ENSCSAG00000000552	ENSCSAT00000017983	442	409	452	427	484	309	208	308	477	556	620	530	775
ENSCSAG00000000553	ENSCSAT00000017982	57	50.03	52	45	52	39	32	28	68.03	43.05	38	35	62
ENSCSAG00000000554	ENSCSAT00000017981	497	521	564	505	599	469	403	562	658	1022	1089	920	1287
ENSCSAG00000000555	ENSCSAT00000017980	184	161	189	156	240	200	211	270	345	633	689	564	655
ENSCSAG00000000556	ENSCSAT00000017979	296	307	293	306	336	275	259	297	451	681	720	544	861
ENSCSAG00000000557	ENSCSAT00000017978	8.04	4	4	1	4	2	0	2	6	9	7	6.04	5
ENSCSAG00000000558	ENSCSAT00000017977	3.05	0	2.03	2.04	2.04	1.02	1.02	1.02	3.06	0	0	0	0
ENSCSAG00000000559	ENSCSAT00000017976	7	3	6	5	3	3	0	7	1	9	11	10	3
ENSCSAG00000000560	ENSCSAT00000017975	4	0	1	0	3	3	0	2	0	2	3	1	1
ENSCSAG00000000561	ENSCSAT00000017974	5	2	4	4	1	2	1	0	2	0	0	0	3
ENSCSAG00000000562	ENSCSAT00000017973	0	0	0	0	0	0	0	0	0	0	0	0	0
ENSCSAG00000000563	ENSCSAT00000017972	0	0	0	0	0	0	0	0	0	0	0	0	0
ENSCSAG00000000564	ENSCSAT00000017971	0	0	0	0	0	0	0	0	0	0	0	0	0
ENSCSAG00000000565	ENSCSAT00000017970	38	35	31	43	35	43	29	42	79	61	70	59	107
ENSCSAG00000000566	ENSCSAT00000017969	0	0	0	1	0	0	0	1	1	1	0	0	0
ENSCSAG00000000567	ENSCSAT00000017968	15	20	21	22	29	32	23	31	38	30	32	28	31
ENSCSAG00000000568	ENSCSAT00000017967	0	0	0	0	0	0	0	0	1	0	0	0	0
ENSCSAG00000000569	ENSCSAT00000017966	67	69	71	61	92	51	45	48	70	31	32	40	40
ENSCSAG00000000570	ENSCSAT00000017965	83	112	108	105	92	136	82	139	33	97	99	89	64
ENSCSAG00000000571	ENSCSAT00000017964	217	193	193	181	267	171	125	157	115	69	69	56	43
ENSCSAG00000000572	ENSCSAT00000017963	71	71	92	57	56	46	48	65	99	58	60	53	104
ENSCSAG00000000573	ENSCSAT00000017962	0	0	0	0	0	0	0	0	0	0	0	0	0
ENSCSAG00000000574	ENSCSAT00000017961	0	0	0	0	0	0	0	0	0	0	0	0	0
ENSCSAG00000000575	ENSCSAT00000017960	0	0	0	0	0	0	0	0	0	0	0	0	0
ENSCSAG00000000576	ENSCSAT00000017959	0	0	0	0	0	0	0	0	0	0	0	0	0
ENSCSAG00000000577	ENSCSAT00000017958	0	0	0	0	0	0	0	0	0	0	0	0	0
ENSCSAG00000000578	ENSCSAT00000017957	0	0	0	0	0	0	1	0	0	0	0	0	0
ENSCSAG00000000579	ENSCSAT00000017956	0	0	0	0	0	0	0	0	0	0	0	0	0
ENSCSAG00000000580	ENSCSAT00000017955	476	412.99	429.99	445.95	473	407.99	289	362	725.97	424	464	371.98	830
ENSCSAG00000000581	ENSCSAT00000017954	1	0	1	1	0	1	0	2	4	0	1	0	0
ENSCSAG00000000582	ENSCSAT00000017953	0	0	0	0	0	0	0	0	0	0	0	0	0
ENSCSAG00000000583	ENSCSAT00000017952	110	116	105	113	115	98	70	100	108	55	73	45	52
ENSCSAG00000000584	ENSCSAT00000017951	2	2	1	4	1	2	1	4	5	0	1	1	0
ENSCSAG00000000585	ENSCSAT00000017950	0	0	0	0	0	0	0	0	0	0	0	0	0
ENSCSAG00000000586	ENSCSAT00000017949	0	0	0	0	0	0	0	0	0	0	0	0	0
ENSCSAG00000000587	ENSCSAT00000017948	0	0	0	0	0	0	0	0	1	1	0	0	1
ENSCSAG00000000588	ENSCSAT00000017947	0	0	0	0	0	0	0	0	0	0	0	0	0
ENSCSAG00000000589	ENSCSAT00000017946	0	0	0	0	0	0	0	0	0	0	0	0	0
ENSCSAG00000000590	ENSCSAT00000017945	0	0	0	0	0	0	0	0	0	0	0	0	0
ENSCSAG00000000591	ENSCSAT00000017944	0	0	0	0	0	0	0	0	0	0	0	0	0
ENSCSAG00000000592	ENSCSAT00000017943	1	0	0	1	1	0	0	0	1	0	2	1	2
ENSCSAG00000000593	ENSCSAT00000017942	1.17	1.27	1.79	0	0	1.3	0	0	0	0	0	0	1.17
ENSCSAG00000000594	ENSCSAT00000017941	436	436	461	447	446	346	283	399	350	336	360	288	413
ENSCSAG00000000595	ENSCSAT00000017940	232	218.65	236.41	217.01	284	137.71	129.08	180.87	212	58	91	69.26	92
ENSCSAG00000000596	ENSCSAT00000017939	16	15	13	20	13	18	9	23	45	39	47	35	102
ENSCSAG00000000597	ENSCSAT00000017938	0	0	0	0	0	0	0	0	0	0	0	0	0
ENSCSAG00000000598	ENSCSAT00000017937	0	0	0	0	0	0	0	0	0	0	0	0	0
ENSCSAG00000000599	ENSCSAT00000017936	3	0	2	3	0	18	18	22	11	18	17	10	18
ENSCSAG00000000600	ENSCSAT00000017935	30.4	17.8	28.63	26.43	46.13	25.57	21.05	21.67	39.33	19.55	9.61	18.91	30.25
ENSCSAG00000000601	ENSCSAT00000017934	0	0	0	0	0	0	0	0	0	0	0	0	0
ENSCSAG00000000602	ENSCSAT00000017933	596.06	571	579.33	615	641	555.33	376.3	577	871.25	225	240	187	304.35
ENSCSAG00000000603	ENSCSAT00000017932	0	0	0	0	0	0	0	0	0	0	0	0	0
ENSCSAG00000000604	ENSCSAT00000017931	0	0	0	0	0	0	0	0	0	0	0	0	0
ENSCSAG00000000605	ENSCSAT00000017930	0	0	0	0	0	0	0	0	0	0	0	0	0
ENSCSAG00000000606	ENSCSAT00000017929	117	111	135	115	103	119	78	119	103	104	92	96	110
ENSCSAG00000000607	ENSCSAT00000017928	12	15	15	15	14	7	8	16	4	14	17	12	17
ENSCSAG00000000608	ENSCSAT00000017927	0	0	1	1	2	1	0	2	1	3	4	1	5
ENSCSAG00000000609	ENSCSAT00000017926	2075	2195	2350	2522	2333	2035	1532	2016	4431	1610	1656	1366	3240
ENSCSAG00000000610	ENSCSAT00000017925	3124	3048	3382	3080	4803	1469	1144	1602	1975	547	629	450	550
ENSCSAG00000000611	ENSCSAT00000017924	141	101	146	122	130	69	76	91	86	90	97	80	90
ENSCSAG00000000612	ENSCSAT00000017923	3	2	0	2	0	1	3	1	3	0	0	0	1
ENSCSAG00000000613	ENSCSAT00000017922	185	187	214	213	167	322	160	312	166	127	97	114	96
ENSCSAG00000000614	ENSCSAT00000017921	0	1	0	0	0	0	0	0	0	0	0	1	0
ENSCSAG00000000615	ENSCSAT00000017920	22	29	28	28	33	27	46	38	25	30	33	31	39
ENSCSAG00000000616	ENSCSAT00000017919	0	0	0	1	2	5	6	7	17	11	8	8	38
ENSCSAG00000000617	ENSCSAT00000017918	0	0	0	0	0	0	0	0	0	0	0	1	1
ENSCSAG00000000618	ENSCSAT00000017917	133	134	134	141	126	154	127	173	146	220	230	177	275
ENSCSAG00000000619	ENSCSAT00000017916	586	699	660	661	578	206	177	273	159	159	195	142	106
ENSCSAG00000000620	ENSCSAT00000017915	0	2	0	1	0	0	1	6	0	12	13	12	16
ENSCSAG00000000621	ENSCSAT00000017914	0	0	0	0	0	1	0	0	0	0	0	0	0
ENSCSAG00000000622	ENSCSAT00000017913	0	1	0	0	0	0	0	0	0	0	2	0	4
ENSCSAG00000000623	ENSCSAT00000017912	1	0	0	0	0	0	0	0	0	1	0	0	0
ENSCSAG00000000624	ENSCSAT00000017911	3	2	1	0	1	0	0	0	0	0	0	0	1
ENSCSAG00000000625	ENSCSAT00000017910	16	13	10	19	25	12	6	9	10	11	5	8	16
ENSCSAG00000000626	ENSCSAT00000017909	294	292	323	290	363	202	166	203	397	263	308	216	395
ENSCSAG00000000627	ENSCSAT00000017908	312.87	289.26	273.05	354.76	238.28	220	140.56	220.47	354.22	125.33	117.8	108.43	207.3
ENSCSAG00000000628	ENSCSAT00000017907	0	0	0	0	0	0	0	0	0	0	0	0	0
ENSCSAG00000000629	ENSCSAT00000017906	0	0	0	0	0	0	0	0	0	0	0	0	0
ENSCSAG00000000630	ENSCSAT00000017905	0	0	0	0	0	0	0	0	0	0	0	0	0
ENSCSAG00000000631	ENSCSAT00000017904	1	9	7	3	4	16	7	9	9	8	4	3	4
ENSCSAG00000000632	ENSCSAT00000017903	96	115	104	98	132	83	79	99	137	95	100	102	130
ENSCSAG00000000633	ENSCSAT00000017902	20	10	11	13	11	34	17	23	33	25	31	35	53
ENSCSAG00000000634	ENSCSAT00000017901	0	0	0	0	0	0	0	0	0	0	0	0	0
ENSCSAG00000000635	ENSCSAT00000017900	0	0	0	0	0	0	0	0	0	0	0	0	0
ENSCSAG00000000636	ENSCSAT00000017899	0	0	0	0	0	0	0	0	0	0	0	0	0
ENSCSAG00000000637	ENSCSAT00000017898	0	0	0	0	0	0	0	0	0	0	0	0	0
ENSCSAG00000000638	ENSCSAT00000017897	90	103	105	104	95	72	109	114	44	132	133	114	123
ENSCSAG00000000639	ENSCSAT00000017896	0	1	0	0	0	0	0	2	0	7	5	5	2
ENSCSAG00000000640	ENSCSAT00000017895	0	0	0	0	0	0	0	0	0	0	0	0	0
ENSCSAG00000000641	ENSCSAT00000017894	11	13	15	9	11	8	12	16	20	7	15	13	13
ENSCSAG00000000642	ENSCSAT00000017893	44	33	26	43	45	22	17	22	25	47	60	41	65
ENSCSAG00000000643	ENSCSAT00000017892	0	0	0	0	0	0	0	0	0	0	0	0	0
ENSCSAG00000000644	ENSCSAT00000017891	114	113	131	124	140	151	101	189	154	79	97	80	123
ENSCSAG00000000645	ENSCSAT00000017890	0	0	0	0	0	0	0	0	0	0	0	0	0
ENSCSAG00000000646	ENSCSAT00000017889	83	72	82	82	43	76	66	68	79	107	103	74	129
ENSCSAG00000000647	ENSCSAT00000017888	12.84	19	14.68	19	14.63	9	6.88	12.9	18.25	10	8.94	8.03	12.62
ENSCSAG00000000648	ENSCSAT00000017887	0	0	0	0	0	0	0	0	0	0	0	0	0
ENSCSAG00000000649	ENSCSAT00000017886	2	2	6	5	7	6	1	4	2	24	27	16	30
ENSCSAG00000000650	ENSCSAT00000017885	16	17	19	18	20	40	23	27	51	92	93	67	146
ENSCSAG00000000651	ENSCSAT00000017884	3	10	6	4	6	13	6	20	14	18	12	6	15
ENSCSAG00000000652	ENSCSAT00000017883	351	355	422	337	238	796	597	856	535	397	424	364	362
ENSCSAG00000000653	ENSCSAT00000017882	1	0	1	0	0	1	1	0	0	1	0	0	4
ENSCSAG00000000654	ENSCSAT00000017881	5.06	7	11.21	9.09	8	15	5	7	14	10	5	3.06	23
ENSCSAG00000000655	ENSCSAT00000017880	9.76	18.37	13.46	8.42	7.34	19.45	22.51	27.38	16.57	22.58	7.54	12.08	15.53
ENSCSAG00000000656	ENSCSAT00000017879	0	0	0	0	0	0	0	0	0	0	0	0	0
ENSCSAG00000000657	ENSCSAT00000017878	12	13	15	10	11	16	12	14	16	55	55	43	105
ENSCSAG00000000658	ENSCSAT00000017877	91	82	87	75	92	67	62	96	137	209	226	185	278
ENSCSAG00000000659	ENSCSAT00000017876	129	127	133	122	165	228	198	286	262	112	150	116	150
ENSCSAG00000000660	ENSCSAT00000017875	2	0	0	2	0	1	0	0	0	0	0	0	1
ENSCSAG00000000661	ENSCSAT00000017874	508	500	548	491	396	886	413	696	566	429	351	382	341
ENSCSAG00000000662	ENSCSAT00000017873	0	0	0	0	0	0	0	0	0	0	0	0	0
ENSCSAG00000000663	ENSCSAT00000017872	19	20	20	19.04	148	5	7	8	5	3	3	5	5
ENSCSAG00000000664	ENSCSAT00000017871	1810	1773	1840	1801.96	2354	1411	977	1465	1765	1032	1013	890	1190
ENSCSAG00000000665	ENSCSAT00000017870	190	181	199	223	177	228	100	204	182	123	99	109	116
ENSCSAG00000000666	ENSCSAT00000017869	22	24	23	19	32	84	32	88	58	66	54	49	81
ENSCSAG00000000667	ENSCSAT00000017868	29	31	29	41	39	101	47	80	109	81	59	69	94
ENSCSAG00000000668	ENSCSAT00000017867	3	4	7	2	4	6	0	0	2	3	2	0	0
ENSCSAG00000000669	ENSCSAT00000017866	44	38	53	41	59	90	59	77	153	129	141	113	266
ENSCSAG00000000670	ENSCSAT00000017865	5480	5346	5994	5491	5073	6761	5193	7559	5655	11705	11598	10305	10592
ENSCSAG00000000671	ENSCSAT00000017864	12	6	8	6	14	7	2	12	5	3	6	6	11
ENSCSAG00000000672	ENSCSAT00000017863	0	0	1	0	0	0	0	2	0	0	1	0	1
ENSCSAG00000000673	ENSCSAT00000017862	0	1	0	0	0	1	1	0	2	5	0	2	8
ENSCSAG00000000674	ENSCSAT00000017861	24	24	16	29	27	38	25	33	57	126	124	96	218
ENSCSAG00000000675	ENSCSAT00000017860	1756	1754	1822	1920	1781	2036	1394	1939	2570	2675	2806	2471	4090
ENSCSAG00000000676	ENSCSAT00000017859	0	0	0	0	0	1	0	0	1	0	1	0	1
ENSCSAG00000000677	ENSCSAT00000017858	442	480	467	450	464	463	314	508	659	363	420	333	533
ENSCSAG00000000678	ENSCSAT00000017857	1	0	0	0	0	0	0	0	0	1	0	0	0
ENSCSAG00000000679	ENSCSAT00000017856	581	502	561	546	513	981	511	848	774	683	661	611	722
ENSCSAG00000000680	ENSCSAT00000017855	95.11	94.19	119.17	81.46	140.55	151.32	101.72	129.8	261.82	207.1	190.16	209.33	327.85
ENSCSAG00000000681	ENSCSAT00000017854	963.89	956.81	1078.83	950.54	1017.45	877.68	591.28	913.2	1158.18	428.9	463.84	423.67	488.15
ENSCSAG00000000682	ENSCSAT00000017853	64	69	71	74	65	82	51	91	100	78	103	75	135
ENSCSAG00000000683	ENSCSAT00000017852	11	13	16	16	6	30	19	23	11	11	12	4	14
ENSCSAG00000000684	ENSCSAT00000017851	394	430	431	354	473	520	336	513	443	389	390	325	410
ENSCSAG00000000685	ENSCSAT00000017850	421	462	518	495	445	595	381	589	599	851	772	717	1115
ENSCSAG00000000686	ENSCSAT00000017849	423	381	466	450	470	391	256	434	714	406	416	355	706
ENSCSAG00000000687	ENSCSAT00000017848	1032	1022	1150	1013	779	2099	992	1842	1342	909	748	820	769
ENSCSAG00000000688	ENSCSAT00000017847	832.11	886.29	979.26	982.89	1159.99	742.61	542.43	759	1504.55	739	742.24	595.66	1105.63
ENSCSAG00000000689	ENSCSAT00000017846	51	54	40	50	38	24	20	35	33	102	90	90	160
ENSCSAG00000000690	ENSCSAT00000017845	26	26	35	32	14	34	17	37	36	35	24	30	43
ENSCSAG00000000691	ENSCSAT00000017844	455	475	526	472	355	589	474	616	854	600	604	514	941
ENSCSAG00000000692	ENSCSAT00000017843	378	411	435	432	671	387	221	389	400	229	280	232	256
ENSCSAG00000000693	ENSCSAT00000017842	23	22	29	21	15	27	5	16	32	11	14	6	12
ENSCSAG00000000694	ENSCSAT00000017841	1643	1617	1711	1682	1685	1689	1199	1702	2924	1419	1486	1249	2432
ENSCSAG00000000695	ENSCSAT00000017840	0	0	0	0	0	0	0	0	0	0	0	0	0
ENSCSAG00000000696	ENSCSAT00000017839	255	253	291	277	286	416	243	409	424	272	249	250	307
ENSCSAG00000000697	ENSCSAT00000017838	2	1	0	2	0	1.01	1	4	4.01	0	0	0	0
ENSCSAG00000000698	ENSCSAT00000017837	1269	1242	1352	1348	1483	1509.99	921	1533	1586.99	963	879	846	1061
ENSCSAG00000000699	ENSCSAT00000017836	1010	933	1035	951	893	1246	910	1311	1147	943	921	881	989
ENSCSAG00000000700	ENSCSAT00000017835	1139	1121	1292	1240	1337	1376	946	1457	1678	1390	1385	1185	1785
ENSCSAG00000000701	ENSCSAT00000017834	5576	5541	5848	5388	5885	5613	4423	6061	6665	5158	5539	4655	6565
ENSCSAG00000000702	ENSCSAT00000017833	0	0	0	0	1	1	1	3	5	3	2	2	1
ENSCSAG00000000703	ENSCSAT00000017832	15	10	10	6	3	16	13	24	21	7	7	3	4
ENSCSAG00000000704	ENSCSAT00000017831	3	3	2	0	0	11	9	13	8	6	3	0	5
ENSCSAG00000000705	ENSCSAT00000017830	14	19	16	19	13	46	28	41	14	30	18	25	15
ENSCSAG00000000706	ENSCSAT00000017829	0	1	1	2	1	0	0	1	1	1	0	0	0
ENSCSAG00000000707	ENSCSAT00000017828	193	165	203	198	170	259	173.11	280	290	189	193	181	267
ENSCSAG00000000708	ENSCSAT00000017827	125	131	134	132	139	132	104	145	267	187	231	180	403
ENSCSAG00000000709	ENSCSAT00000017826	886	876	907	868	859	1265	865	1299	1017	1117	1097	991	1129
ENSCSAG00000000710	ENSCSAT00000017825	0	1	3	6	1	4	5	3	5	1	1	0	3
ENSCSAG00000000711	ENSCSAT00000017824	959	949	1016	990	1092	1128	797	1202	1707	1418	1543	1245	2147
ENSCSAG00000000712	ENSCSAT00000017823	127	111	125	113	125	124	87	115	92	105	97	101	105
ENSCSAG00000000713	ENSCSAT00000017822	31	29	27	27	18	104	63	122	86	67	57	59	66
ENSCSAG00000000714	ENSCSAT00000017821	208	170	186	187	198	232	165	295	253	141	163	114	149
ENSCSAG00000000715	ENSCSAT00000017820	0	0	0	0	0	0	0	0	0	0	0	0	0
ENSCSAG00000000716	ENSCSAT00000017819	113	104	112	104	89	251	188	258	377	267	242	216	413
ENSCSAG00000000717	ENSCSAT00000017818	11	7	10	2	6	12	10	8	13	10	10	7	11
ENSCSAG00000000718	ENSCSAT00000017817	0	0	0	0	0	0	0	1	0	0	0	0	0
ENSCSAG00000000719	ENSCSAT00000017816	0	0	0	0	0	1	0	0	0	0	0	0	0
ENSCSAG00000000720	ENSCSAT00000017815	0	0	0	0	0	0	0	0	0	0	0	0	0
ENSCSAG00000000721	ENSCSAT00000017814	3	1	1	0	3	3	0	1	0	0	0	0	0
ENSCSAG00000000722	ENSCSAT00000017813	203	209	236	225	304	234	194	273	296	344	400	321	490
ENSCSAG00000000723	ENSCSAT00000017812	264	284	288	247	257	206	141	193	260	167	116	127	169
ENSCSAG00000000724	ENSCSAT00000017811	123	133	125	99	107	109	84	118	78	53	48	54	41
ENSCSAG00000000725	ENSCSAT00000017810	0	0	0	0	0	0	0	0	0	0	0	0	0
ENSCSAG00000000726	ENSCSAT00000017809	1	2	1	0	4	3	0	4	2	1	2	0	4
ENSCSAG00000000727	ENSCSAT00000017808	505	498	569	610	574	483	378	542	464	440	415	384	479
ENSCSAG00000000728	ENSCSAT00000017807	457	464	498	482	473	520	385	582	423	445	476	425	479
ENSCSAG00000000729	ENSCSAT00000017806	76	95	93	79	88	99	73	100	111	80	86	67	100
ENSCSAG00000000730	ENSCSAT00000017805	0	0	0	0	0	0	0	0	0	0	0	0	0
ENSCSAG00000000731	ENSCSAT00000017804	168	175	188	175	160	164	113	196	113	108	97	81	103
ENSCSAG00000000732	ENSCSAT00000017803	68	92	69	76	77	46	47	69	33	37	44	29	41
ENSCSAG00000000733	ENSCSAT00000017802	185	157	150	176	137	104	62	113	35	64	54	67	38
ENSCSAG00000000734	ENSCSAT00000017801	1679.12	1697.31	1812.73	1851.33	1702.18	1380.11	891.49	1285.14	2494.35	894.49	899.96	801.92	1780.26
ENSCSAG00000000735	ENSCSAT00000017800	26	18	23	24	10	13	7	12	5	7	7	3	5
ENSCSAG00000000736	ENSCSAT00000017799	334	364	413	390	412	282	236	352	157	278	291	273	231
ENSCSAG00000000737	ENSCSAT00000017798	0	0	0	0	0	0	0	0	0	0	0	0	0
ENSCSAG00000000738	ENSCSAT00000017797	130	118	121	119	101	128	84	145	63	118	102	109	102
ENSCSAG00000000739	ENSCSAT00000017795,ENSCSAT00000017796	1042	1007	1085	1034	1016	1012	819	1073	1681	893	979	804	1425
ENSCSAG00000000740	ENSCSAT00000017794	3	3	1	2	6	0	1	4	1	3	5	6	7
ENSCSAG00000000741	ENSCSAT00000017793	49.86	48.59	47.67	43.4	15.08	151.17	73.04	116.01	74.89	56.56	51.64	66.39	70.55
ENSCSAG00000000742	ENSCSAT00000017792	23.14	11.41	13.33	9.6	2.92	59.83	25.96	41.99	41.11	11.44	9.36	14.61	13.45
ENSCSAG00000000743	ENSCSAT00000017791	163	167	181	164	107	319	178	286	210	168	159	160	181
ENSCSAG00000000744	ENSCSAT00000017790	342	372	375	320	367	260	234	313	250	267	274	259	240
ENSCSAG00000000745	ENSCSAT00000017789	3	8	6	6	3	10	4	14	4	11	8	3	1
ENSCSAG00000000746	ENSCSAT00000017788	244	240	248	253	259	281	154	284	281	141	153	116	171
ENSCSAG00000000747	ENSCSAT00000017787	557	524	616	558	908	1303	1010	1438	1590	1521	1603	1370	1617
ENSCSAG00000000748	ENSCSAT00000017786	612	630	691	597	489	565	412	557	581	372	341	325	417
ENSCSAG00000000749	ENSCSAT00000017785	57	80	75	67	60	79	62	95	134	67	77	87	121
ENSCSAG00000000750	ENSCSAT00000017784	1330	1220	1297	1249	1491	1253	934	1307	988	751	825	620	789
ENSCSAG00000000751	ENSCSAT00000017783	0	0	1	0	0	0	0	0	0	0	1	0	0
ENSCSAG00000000752	ENSCSAT00000017782	322	296	301	299	328	185	114	168	140	273	238	211	257
ENSCSAG00000000753	ENSCSAT00000017781	3010	2856	3041	2817	3161	2858	2287	3194	3978	3310	3524	2847	4368
ENSCSAG00000000754	ENSCSAT00000017780	406	392	459	411	246	423	335	464	315	322	336	272	302
ENSCSAG00000000755	ENSCSAT00000017779	9	5	8	7	6	8	5	11	9	7	14	9	19
ENSCSAG00000000756	ENSCSAT00000017778	962	887	996	1003	1090	1004	767	1010	1742	1129	1213	986	2071
ENSCSAG00000000757	ENSCSAT00000017777	560	555	584	574	825	526	386	578	617	400	439	400	387
ENSCSAG00000000758	ENSCSAT00000017776	13	22	9	19	7	24	25	29	37	16	15	25	18
ENSCSAG00000000759	ENSCSAT00000017775	1169	1200	1222	1115	923	1423	1055	1567	979	1767	1825	1737	1646
ENSCSAG00000000760	ENSCSAT00000017774	28138	28794	30724	29079	33463	21242	17442	23930	37208	23079	24256	20817	29431
ENSCSAG00000000761	ENSCSAT00000017773	0	0	0	0	0	0	0	0	0	0	0	0	0
ENSCSAG00000000762	ENSCSAT00000017772	0	0	0	0	0	0	0	0	0	0	0	0	0
ENSCSAG00000000763	ENSCSAT00000017771	0	0	0	0	0	0	0	0	0	0	0	0	0
ENSCSAG00000000764	ENSCSAT00000017770	0	0	0	0	0	0	0	0	0	0	0	0	1
ENSCSAG00000000765	ENSCSAT00000017769	1	1	0	0	0	2	0	0	0	0	0	0	0
ENSCSAG00000000766	ENSCSAT00000017768	504	496	551	546	435	472	426	608	113	451	465	388	223
ENSCSAG00000000767	ENSCSAT00000017767	272	247	296	288	259	417	318	446	446	331	328	326	381
ENSCSAG00000000768	ENSCSAT00000017766	175	164	206	171	232	219	118	166	238	173	186	156	258
ENSCSAG00000000769	ENSCSAT00000017765	229	213	222	226	261	129	128	192	128	129	128	103	126
ENSCSAG00000000770	ENSCSAT00000017764	936.23	901	965.22	867.21	984	870.36	669	1006.2	516.24	698.31	713.47	646.32	590.27
ENSCSAG00000000771	ENSCSAT00000017763	6846.77	6986	7220.78	7132.79	7288	8387.64	6450	8865.8	7928.76	8026.69	8275.53	7179.68	8154.73
ENSCSAG00000000772	ENSCSAT00000017762	326	322	319	352	290	701	516	690	850	827	907	760	1453
ENSCSAG00000000773	ENSCSAT00000017761	250	245	265	268	221	258	193	273	328	191	252	181	362
ENSCSAG00000000774	ENSCSAT00000017760	13	11	18	28	13	22	18	22	17	18	15	23	22
ENSCSAG00000000775	ENSCSAT00000017759	0	0	1	0	0	1	0	0	1	0	0	0	0
ENSCSAG00000000776	ENSCSAT00000017758	617	671	720	678	653	529	455	679	227	617	637	543	448
ENSCSAG00000000777	ENSCSAT00000017757	1090	1080	1179	1093	1054	1085	964	1292	381	1959	2100	1785	1212
ENSCSAG00000000778	ENSCSAT00000017756	1777	1861	2001	1983	2146	1898	1464	2097	3225	1745	1825	1636	2070
ENSCSAG00000000779	ENSCSAT00000017755	84	84	94	88	115	88	81	89	146	45	63	44	82
ENSCSAG00000000780	ENSCSAT00000017754	3	0	1	2	2	4	1	4	5	0	3	3	2
ENSCSAG00000000781	ENSCSAT00000017753	774	722	826	780	917	522	451	624	635	626	630	555	762
ENSCSAG00000000782	ENSCSAT00000017752	282	282	324	280	320	262	195	276	359	235	275	232	380
ENSCSAG00000000783	ENSCSAT00000017751	183	171	167	161	157	215	166	278	121	120	131	134	104
ENSCSAG00000000784	ENSCSAT00000017750	2	4	6	0	3	1	1	4	3	1	1	1	0
ENSCSAG00000000785	ENSCSAT00000017749	1269.14	1230.98	1154.4	1162.77	1321.04	1183.07	863.75	1320.51	662.86	851.15	833.2	689.96	687.01
ENSCSAG00000000786	ENSCSAT00000017748	27	19	23	21	9	26	16	36	10	14	17	9	6
ENSCSAG00000000787	ENSCSAT00000017747	827	777	807	758	1007	733	582	830	1310	517	522	458	779
ENSCSAG00000000788	ENSCSAT00000017746	994	941	1069	947	1022	978	719	1016	766	721	775	637	658
ENSCSAG00000000789	ENSCSAT00000017745	4	1	2	3	5	1	0	0	2	4	3	4	0
ENSCSAG00000000790	ENSCSAT00000017744	2543	2442	2622	2450	2365	1712	1401	2080	980	1500	1577	1376	1042
ENSCSAG00000000791	ENSCSAT00000017743	32.17	44.88	37	22.17	42.49	43.9	36.77	63.06	18.57	39.22	47.05	23.13	26.45
ENSCSAG00000000792	ENSCSAT00000017742	670.83	707.12	695	693.83	729.51	779.1	565.23	801.94	799.43	717.78	717.95	631.87	731.55
ENSCSAG00000000793	ENSCSAT00000017741	8	6	9	12	6	4	1	5	3	2	7	4	3
ENSCSAG00000000794	ENSCSAT00000017740	28	28	26	30	17	51	38	63	72	85	84	85	145
ENSCSAG00000000795	ENSCSAT00000017739	131	133	145	140	142.57	150	125	165	181	124	125	112	189.32
ENSCSAG00000000796	ENSCSAT00000017738	71	83	74	88	69.43	100	83	115	175	158	142	101	250.68
ENSCSAG00000000797	ENSCSAT00000017737	632	593	606	637	569	565	404	556	877	488	512	441	798
ENSCSAG00000000798	ENSCSAT00000017736	0	0	0	0	0	0	0	0	0	0	0	0	0
ENSCSAG00000000799	ENSCSAT00000017735	350	356	373	316	378	257	188	255	453	443	500	417	765
ENSCSAG00000000800	ENSCSAT00000017734	218	217	217	187	179	156	121	181	68	204	216	176	166
ENSCSAG00000000801	ENSCSAT00000017733	426	439	502	410	370	548	298	470	304	317	293	305	276
ENSCSAG00000000802	ENSCSAT00000017732	0	0	0	0	0	0	0	0	0	0	0	0	0
ENSCSAG00000000803	ENSCSAT00000017731	107	90	104	89	105	0	0	0	0	0	0	0	0
ENSCSAG00000000804	ENSCSAT00000017730	1390	1347	1424	1371	1467	1364	930	1287	1719	1258	1283	1160	1809
ENSCSAG00000000805	ENSCSAT00000017729	947	1046	1041	1100	978	899	787	1052	758	717	802	650	617
ENSCSAG00000000806	ENSCSAT00000017728	3199	3253	3422	3297	3966	2433	1967	2748	2576	2362	2487	2158	2739
ENSCSAG00000000807	ENSCSAT00000017727	62	53	56	63	54	78	53	94	83	40	35	42	80
ENSCSAG00000000808	ENSCSAT00000017726	0	2	2	2	2	0	0	0	1	0	0	1	0
ENSCSAG00000000809	ENSCSAT00000017725	125	143	113	130	198	213	144	269	267	91	78	88	61
ENSCSAG00000000810	ENSCSAT00000017724	1353	1345	1437	1264	1228	1104	992	1395	564	1235	1251	1121	765
ENSCSAG00000000811	ENSCSAT00000017723	50	53	49	45	23	2	3	7	2	71	57	39	104
ENSCSAG00000000812	ENSCSAT00000017722	0	0	0	0	0	0	0	0	0	0	0	0	0
ENSCSAG00000000813	ENSCSAT00000017721	0	0	0	0	0	0	0	0	0	0	0	0	0
ENSCSAG00000000814	ENSCSAT00000017720	0	0	0	0	0	2	0	0	2	3	5	4	3
ENSCSAG00000000815	ENSCSAT00000017719	0	0	0	0	0	0	0	0	0	3	1	0	2
ENSCSAG00000000816	ENSCSAT00000017718	0	0	0	0	0	0	0	0	0	1	1	0	0
ENSCSAG00000000817	ENSCSAT00000017716,ENSCSAT00000017717	0	1	0	0	0	0	0	0	0	0	1	0	0
ENSCSAG00000000818	ENSCSAT00000017715	0	0	0	0	0	0	0	0	0	0	0	0	0
ENSCSAG00000000819	ENSCSAT00000017714	0	0	0	0	0	0	0	0	0	1	1	0	0
ENSCSAG00000000820	ENSCSAT00000017713	0	0	0	0	0	0	0	0	0	0	0	1	0
ENSCSAG00000000821	ENSCSAT00000017712	0	0	0	0	0	0	0	0	0	0	0	0	0
ENSCSAG00000000822	ENSCSAT00000017711	0	0	0	0	0	0	0	0	0	0	0	0	0
ENSCSAG00000000823	ENSCSAT00000017710	128	141	158	133	106	67	54	85	85	2	4	4	9
ENSCSAG00000000824	ENSCSAT00000017709	504	533	506	432	498	595	461	641	255	495	493	409	283
ENSCSAG00000000825	ENSCSAT00000017708	43	46	44	39	42	81	55	62	38	127	128	112	160
ENSCSAG00000000826	ENSCSAT00000017707	0	0	0	0	0	0	0	0	0	0	0	0	0
ENSCSAG00000000827	ENSCSAT00000017706	376	342	375	385	385	821	574	789	1146	570	562	466	819
ENSCSAG00000000828	ENSCSAT00000017705	4	2	8	5	1	4	6	3	3	2	2	4	12
ENSCSAG00000000829	ENSCSAT00000017704	23	24	22	26	21	65	54	91	57	37	41	41	66
ENSCSAG00000000830	ENSCSAT00000017703	2784	2720	2945	2991	2928	2737	2194	2884	3756	1753	1920	1561	2334
ENSCSAG00000000831	ENSCSAT00000017702	0	0	0	0	0	1	0	0	0	0	0	0	0
ENSCSAG00000000832	ENSCSAT00000017701	2	3	2	2	3	3	1	2	5	2	1	1	4
ENSCSAG00000000833	ENSCSAT00000017700	402	386	424	373	416	406	298	424	562	448	436	393	616
ENSCSAG00000000834	ENSCSAT00000017699	205	229	214	180	182	155	158	195	60	249	254	197	149
ENSCSAG00000000835	ENSCSAT00000017698	22	24	25	11	19	23	14	20	43	1	1	2	0
ENSCSAG00000000836	ENSCSAT00000017697	567	600	607	553	590	535	468	721	236	589	633	518	345
ENSCSAG00000000837	ENSCSAT00000017696	590	544	606	566	578	883	610	870	719	560	584	486	688
ENSCSAG00000000838	ENSCSAT00000017695	1	2	4	0	4	2	4	9	1	1	0	0	0
ENSCSAG00000000839	ENSCSAT00000017694	0	0	0	0	0	0	0	0	0	0	0	0	0
ENSCSAG00000000840	ENSCSAT00000017693	323	323	370	355	353	981	666	936	1043	91	89	88	90
ENSCSAG00000000841	ENSCSAT00000017692	2137	2135	2085	2044	1820	1762	1501	2210	433	1484	1361	1355	574
ENSCSAG00000000842	ENSCSAT00000017691	26	30	28	25	39	31	20	31	33	30	21	16	23
ENSCSAG00000000843	ENSCSAT00000017690	0	0	0	0	0	0	0	0	0	0	0	0	0
ENSCSAG00000000844	ENSCSAT00000017689	1	1	2	2	3	2	0	2	0	0	1	0	0
ENSCSAG00000000845	ENSCSAT00000017688	1	0	1	0	0	4	4	2	3	1	2	3	7
ENSCSAG00000000846	ENSCSAT00000017687	0	0	0	0	0	0	0	0	0	0	0	0	0
ENSCSAG00000000847	ENSCSAT00000017686	22	10	26	21	7	11	5	8	5	6	4	7	12
ENSCSAG00000000848	ENSCSAT00000017685	1661	1631	1746	1672	2476	1662	1296	1869	1806	1108	1147	1004	1061
ENSCSAG00000000849	ENSCSAT00000017684	0	0	0	0	0	0	0	0	0	0	0	0	0
ENSCSAG00000000850	ENSCSAT00000017683	70	62	93	71	46	112	79	102	113	90	100	76	104
ENSCSAG00000000851	ENSCSAT00000017682	38	65	54	48	55	99	69	93	146	81	77	58	124
ENSCSAG00000000852	ENSCSAT00000017681	641	627	604	608	579	671	488	673	516	511	570	509	531
ENSCSAG00000000853	ENSCSAT00000017680	411	347	408	401	438	418	355	475	339	324	355	277	361
ENSCSAG00000000854	ENSCSAT00000017679	0	1	1	0	1	1	0	0	0	1	0	0	0
ENSCSAG00000000855	ENSCSAT00000017678	836	861	871	866	868	786	624	841	1127	745	769	715	1049
ENSCSAG00000000856	ENSCSAT00000017677	0	0	0	0	0	1	0	0	0	0	0	0	0
ENSCSAG00000000857	ENSCSAT00000017676	133	141	116	134	85	178	97	189	145	243	214	178	223
ENSCSAG00000000858	ENSCSAT00000017675	8	7	12	7	17	5	5	7	13	0	0	0	3
ENSCSAG00000000859	ENSCSAT00000017674	823	747	911	798	664	1331	954	1423	1258	1004	1005	894	1170
ENSCSAG00000000860	ENSCSAT00000017673	961	927	963	877	1096	747	568	803	1357	715	748	653	1164
ENSCSAG00000000861	ENSCSAT00000017672	221	223	259	230	172	199	159	195	201	15	16	11	34
ENSCSAG00000000862	ENSCSAT00000017671	141	149	160	151	135	27	13	30	31	12	17	17	22
ENSCSAG00000000863	ENSCSAT00000017670	0	0	0	0	0	0	0	0	0	0	0	0	0
ENSCSAG00000000864	ENSCSAT00000017669	2	2	4	2	8	1	1	1	9	0	0	1	2
ENSCSAG00000000865	ENSCSAT00000017668	0	0	0	0	0	0	0	0	0	0	0	0	0
ENSCSAG00000000866	ENSCSAT00000017667	433	423	421	432	496	384	337	402	269	306	294	257	256
ENSCSAG00000000867	ENSCSAT00000017666	277	242	257	235	249	295	208	319	252	363	378	275	448
ENSCSAG00000000868	ENSCSAT00000017665	2	0	1	2	3	0	0	0	0	0	1	0	0
ENSCSAG00000000869	ENSCSAT00000017664	0	0	0	0	0	0	0	0	0	0	0	0	0
ENSCSAG00000000870	ENSCSAT00000017663	0	0	0	0	0	0	0	0	0	0	0	0	0
ENSCSAG00000000871	ENSCSAT00000017662	0	0	0	0	0	0	0	0	0	0	0	0	0
ENSCSAG00000000872	ENSCSAT00000017661	689	633	724	666	763	426	321	433	595	417	406	367	622
ENSCSAG00000000873	ENSCSAT00000017660	974	963	1066	1025	965	1036	751	1094	1027	715	712	652	798
ENSCSAG00000000874	ENSCSAT00000017659	3955	4033	4149	3825	2548	3041	2478	3661	1323	4851	4846	4287	2688
ENSCSAG00000000875	ENSCSAT00000017658	677	686	775	702	665	545	508	653	330	527	523	456	332
ENSCSAG00000000876	ENSCSAT00000017657	273.09	233.48	299.65	258.03	400.69	235	176.59	234.54	257.87	137	123	114.29	151.34
ENSCSAG00000000877	ENSCSAT00000017656	288	286	320.1	284.94	282	302.13	250	352.86	494.53	447.54	445.47	405.22	693.14
ENSCSAG00000000878	ENSCSAT00000017655	659.65	691.33	712.25	704.69	851.31	608.87	480.38	656.5	1004.25	481.46	554.58	454.05	829.29
ENSCSAG00000000879	ENSCSAT00000017654	179	185	203	155	250	218	171	244	384	367	354	310	490
ENSCSAG00000000880	ENSCSAT00000017653	2734	2798	3022	2922	3561	2315	1894	2503	3487	2442	2714	2265	3613
ENSCSAG00000000881	ENSCSAT00000017652	1049	933	1082	1127	1437	978	634	921	1293	728	739	627	1184
ENSCSAG00000000882	ENSCSAT00000017651	21	15	15	15	9	13	4	9	4	3	1	0	0
ENSCSAG00000000883	ENSCSAT00000017650	99	88	102	93	89	130	91	134	94	80	80	84	119
ENSCSAG00000000884	ENSCSAT00000017649	73	61	95	82	65	93	59	102	24	66	50	77	43
ENSCSAG00000000885	ENSCSAT00000017648	0	0	0	0	0	0	0	0	0	0	0	0	0
ENSCSAG00000000886	ENSCSAT00000017647	0	0	0	0	0	0	0	0	0	1	0	0	0
ENSCSAG00000000887	ENSCSAT00000017646	0	0	0	0	0	0	0	0	0	0	0	0	0
ENSCSAG00000000888	ENSCSAT00000017645	0	0	0	0	0	0	0	0	0	0	0	0	0
ENSCSAG00000000889	ENSCSAT00000017644	0	0	0	0	0	0	0	0	0	0	0	0	0
ENSCSAG00000000890	ENSCSAT00000017643	0	0	0	0	0	0	0	0	0	0	0	0	0
ENSCSAG00000000891	ENSCSAT00000017642	0	0	0	0	0	0	0	0	0	0	0	0	0
ENSCSAG00000000892	ENSCSAT00000017641	21	20	28	23	34	16	20	19	22	6	7	7	13
ENSCSAG00000000893	ENSCSAT00000017640	386	368	455	411	405	346	286	377	424	404	420	347	553
ENSCSAG00000000894	ENSCSAT00000017639	3	2	0	2	0	2	3	5	2	2	1	1	2
ENSCSAG00000000895	ENSCSAT00000017638	0	0	0	0	0	0	0	0	1	0	0	1	0
ENSCSAG00000000896	ENSCSAT00000017637	331	300	343	299	320	300	264	319	478	672	746	635	1084
ENSCSAG00000000897	ENSCSAT00000017636	4408	4316	4600	4568	4633	3406	2899	3749	4049	3706	3955	3223	4532
ENSCSAG00000000898	ENSCSAT00000017635	4	5	7	5	3	6	5	7	6	3	4	4	4
ENSCSAG00000000899	ENSCSAT00000017634	22	20	18	23	30	26	15	34	20	18	18	19	23
ENSCSAG00000000900	ENSCSAT00000017633	1212	1197	1279	1260	1009	1194	897	1298	1039.99	863	929	763	902
ENSCSAG00000000901	ENSCSAT00000017632	2176	2131	2222	2089	2157	1577	1281	1763	1026	1670	1646	1461	1155
ENSCSAG00000000902	ENSCSAT00000017631	1587	1701	1777	1599	1501	3291	2538	3729	3301	2034	2216	1938	2187
ENSCSAG00000000903	ENSCSAT00000017630	68	59	61	69	125	269	200	299	271	1442	1518	1330	1910
ENSCSAG00000000904	ENSCSAT00000017629	99	87	100	92	70	212	155	246	285	297	319	271	353
ENSCSAG00000000905	ENSCSAT00000017628	1673	1669	1811	1654	1760	1357	1071	1463	1396	894	866	807	891
ENSCSAG00000000906	ENSCSAT00000017627	0	0	0	0	0	0	0	0	0	0	0	0	0
ENSCSAG00000000907	ENSCSAT00000017626	10539	10347	11098	10157	6851	8972	7018	10290	4160	2069	2050	1871	1070
ENSCSAG00000000908	ENSCSAT00000017625	0	0	0	0	0	0	0	0	0	0	0	0	0
ENSCSAG00000000909	ENSCSAT00000017624	1204	1212	1373	1248	1284	1089	926	1264	1493	1053	1130	931	1449
ENSCSAG00000000910	ENSCSAT00000017623	17	9	9	13	27	28	17	29	30	12	8	8	23
ENSCSAG00000000911	ENSCSAT00000017622	756	706	767	714	605	763	510	792	457	613	550	578	452
ENSCSAG00000000912	ENSCSAT00000017621	1	1	1	4	3	1	0	2	0	2	1	1	2
ENSCSAG00000000913	ENSCSAT00000017620	0	0	0	0	0	0	0	0	0	0	0	0	0
ENSCSAG00000000914	ENSCSAT00000017619	0	0	0	0	0	0	0	0	0	0	0	0	0
ENSCSAG00000000915	ENSCSAT00000017618	0	0	0	0	0	0	0	0	0	0	0	0	0
ENSCSAG00000000916	ENSCSAT00000017617	1979	1918	2068	1889	2330	1909	1495	2097	1783	596	613	588	559
ENSCSAG00000000917	ENSCSAT00000017616	0	0	0	0	0	0	0	0	0	0	0	0	0
ENSCSAG00000000918	ENSCSAT00000017615	0	0	0	0	0	0	0	0	0	0	0	0	0
ENSCSAG00000000919	ENSCSAT00000017614	1796	1781	1951	1896	1653	1462	1136	1675	1420	1021	1107	991	1204
ENSCSAG00000000920	ENSCSAT00000017613	868	887	938	774	807	786	639	948	443	534	590	530	343
ENSCSAG00000000921	ENSCSAT00000017612	0	0	0	0	0	0	0	0	0	0	0	0	0
ENSCSAG00000000922	ENSCSAT00000017611	2553	2653	2727	2641	3291	2344	1973	2680	2369	1491	1514	1295	1561
ENSCSAG00000000923	ENSCSAT00000017610	103	110	107	92	73	128	74	111	40	92	84	80	87
ENSCSAG00000000924	ENSCSAT00000017609	1	1	0	0	2	1	0	0	0	0	0	0	2
ENSCSAG00000000925	ENSCSAT00000017608	254	254	265	238	164	255	162	263	198	165	150	171	192
ENSCSAG00000000926	ENSCSAT00000017607	55	56	52	67	68	41	32	32	16	10	13	11	8
ENSCSAG00000000927	ENSCSAT00000017606	55	60	57	46	352	3	4	4	6	47	45	36	48
ENSCSAG00000000928	ENSCSAT00000017605	0	0	0	0	0	0	0	0	0	0	0	0	0
ENSCSAG00000000929	ENSCSAT00000017604	7589.99	7530.95	8091.21	7753.22	7950.98	6451.95	4514.97	6229.94	11379.3	4639.49	4924.99	4084.61	8800.99
ENSCSAG00000000930	ENSCSAT00000017603	1147	1198	1220	1188	1592	1156	920	1272	1084	836	868	751	792
ENSCSAG00000000931	ENSCSAT00000017602	88	84	85	72	88	99	66	113	96	71	84	71	130
ENSCSAG00000000932	ENSCSAT00000017601	249.59	242.19	258.79	253.52	267.92	216.79	169.99	264.27	316.73	361.3	388.46	345	524.46
ENSCSAG00000000933	ENSCSAT00000017600	1518.41	1489.81	1608.21	1577.48	1947.08	1166.21	938.01	1267.73	1984.27	1436.7	1457.54	1328	1900.54
ENSCSAG00000000934	ENSCSAT00000017599	1042	1128	1112	1135	1016	786	672	821	1414	1352	1384	1122	2250
ENSCSAG00000000935	ENSCSAT00000017598	261	263	272	232	269	213	129	200	160	103	107	82	78
ENSCSAG00000000936	ENSCSAT00000017597	17	14	10	21	16	73	64	78	61	40	35	33	47
ENSCSAG00000000937	ENSCSAT00000017596	10	17	8	14	5	53	43	60	41	122	103	106	120
ENSCSAG00000000938	ENSCSAT00000017595	51	31	42	48	45	34	30	35	17	21	30	21	31
ENSCSAG00000000939	ENSCSAT00000017594	4	1	1	2	1	0	2	1	4	1	0	0	1
ENSCSAG00000000940	ENSCSAT00000017593	8	6	7	7	6	14	14	18	19	4	1	5	9
ENSCSAG00000000941	ENSCSAT00000017592	230	222	227	214	176	168	190	199	87	264	278	212	216
ENSCSAG00000000942	ENSCSAT00000017591	1	0	0	0	0	0	0	1	1	0	0	1	0
ENSCSAG00000000943	ENSCSAT00000017590	488	480	495	440	444	517	363	570	525	556	570	492	775
ENSCSAG00000000944	ENSCSAT00000017589	0	0	1	0	0	0	1	3	0	0	0	0	1
ENSCSAG00000000945	ENSCSAT00000017588	1765	1633	1792	1677	1557	1261	816	1277	1440	931	962	864	1057
ENSCSAG00000000946	ENSCSAT00000017587	3757	3778	4049	3808	3448	1491	1392	1952	1263	777	949	811	1004
ENSCSAG00000000947	ENSCSAT00000017586	26	19	26	23	18	34	23	18	30	3	2	0	0
ENSCSAG00000000948	ENSCSAT00000017585	783	832	815	828	861	725	582	724	1273	731	750	667	1216
ENSCSAG00000000949	ENSCSAT00000017584	233	243	279	254	150	396	184	319	289	196	134	150	125
ENSCSAG00000000950	ENSCSAT00000017583	940	921	1031	994	917	1102	831	1148	1769	1459	1536	1237	2419
ENSCSAG00000000951	ENSCSAT00000017582	177	147	167	138	186	103	91	94	138	240	202	183	460
ENSCSAG00000000952	ENSCSAT00000017581	344	365	384	345	365	442	287	449	489	668	716	636	800
ENSCSAG00000000953	ENSCSAT00000017580	594	587	604	594	612	819	553	804	766	516	516	467	553
ENSCSAG00000000954	ENSCSAT00000017579	85	76	86	88	57	116	87	144	165	99	136	104	120
ENSCSAG00000000955	ENSCSAT00000017578	528	445	517	447	422	613	540	709	303	438	478	389	390
ENSCSAG00000000956	ENSCSAT00000017577	0	1	0	1	0	0	0	1	0	1	1	0	0
ENSCSAG00000000957	ENSCSAT00000017576	0	2	1	0	2	1	0	1	1	2	0	2	1
ENSCSAG00000000958	ENSCSAT00000017575	724.38	713.83	789.65	755.07	736.46	824.2	576.62	800.27	1094.14	631.66	662.11	599.52	918.42
ENSCSAG00000000959	ENSCSAT00000017574	13.62	15.17	17.35	19.93	27.54	19.8	18.38	21.73	11.86	6.34	9.89	3.48	3.58
ENSCSAG00000000960	ENSCSAT00000017573	2621	2697	2824	2741	2250	1160	888	1286	2172	494	517	457	741
ENSCSAG00000000961	ENSCSAT00000017572	154	163	177	144	155	146	142	198	166	144	156	124	209
ENSCSAG00000000962	ENSCSAT00000017571	0	0	0	0	0	0	0	0	0	0	1	0	0
ENSCSAG00000000963	ENSCSAT00000017570	1	0	1	1	2	2	1	1	2	0	0	0	0
ENSCSAG00000000964	ENSCSAT00000017569	2	6	2	6	1	12	14	11	8	5	5	2	10
ENSCSAG00000000965	ENSCSAT00000017568	125	99	113	79	119	141	99	127	177	139	116	88	190
ENSCSAG00000000966	ENSCSAT00000017567	169	174	189	172	258	163	138	154	332	101	114	87	166
ENSCSAG00000000967	ENSCSAT00000017566	5	7	7	8	4	15	4	7	7	0	0	1	0
ENSCSAG00000000968	ENSCSAT00000017565	1	3	0	0	0	1	1	0	1	0	0	0	0
ENSCSAG00000000969	ENSCSAT00000017564	518	505	564	514	510	647	447	672	339	265	243	210	156
ENSCSAG00000000970	ENSCSAT00000017563	468	483	507	511	587	891	746	1033	1691	1038	1156	952	1831
ENSCSAG00000000971	ENSCSAT00000017562	32	40	40	47	68	84	68	96	114	58	84	67	113
ENSCSAG00000000972	ENSCSAT00000017561	1	11	4	8	18	5	7	7	6	1	4	0	4
ENSCSAG00000000973	ENSCSAT00000017560	0	1	1	0	0	0	0	0	0	0	0	0	0
ENSCSAG00000000974	ENSCSAT00000017559	0	0	0	0	0	0	0	0	0	0	0	0	0
ENSCSAG00000000975	ENSCSAT00000017558	0	0	0	0	0	0	0	0	0	0	0	0	0
ENSCSAG00000000976	ENSCSAT00000017557	81	103	122	123	122	100	80	119	105	148	155	120	165
ENSCSAG00000000977	ENSCSAT00000017556	0	0	0	0	0	0	0	0	0	0	0	0	0
ENSCSAG00000000978	ENSCSAT00000017555	598	594	623	568	570	522	364	611	584	511	575	482	692
ENSCSAG00000000979	ENSCSAT00000017554	1946	1969	2054	1839	1828	1788	1288	1958	1314	1209	1145	1022	947
ENSCSAG00000000980	ENSCSAT00000017553	80	86	79	68	63	113	74	103	148	98	99	98	125
ENSCSAG00000000981	ENSCSAT00000017552	108	119	124	107	123	154	109	157	123	143	154	138	174
ENSCSAG00000000982	ENSCSAT00000017551	340	314	374	333	437	376	266	388	461	500	514	447	640
ENSCSAG00000000983	ENSCSAT00000017550	53	59	82	66	53	80	49	82	100	97	115	96	150
ENSCSAG00000000984	ENSCSAT00000017549	0	0	0	0	0	1	0	0	0	0	0	0	0
ENSCSAG00000000985	ENSCSAT00000017548	2685	2586	2690	2716	3291	2437	1895	2696	4110	2748	2950	2450	3763
ENSCSAG00000000986	ENSCSAT00000017547	0	1	3	1	2	5	2	2	0	0	0	0	0
ENSCSAG00000000987	ENSCSAT00000017546	37	25	30	29	15	15	12	18	16	12	16	10	23
ENSCSAG00000000988	ENSCSAT00000017545	645	655	714	643	584	830	615	986	623	775	884	749	662
ENSCSAG00000000989	ENSCSAT00000017544	564	526	563	571	497	653	507	705	643	592	553	531	679
ENSCSAG00000000990	ENSCSAT00000017543	205	190	229	221	228	259	173	243	273	305	341	271	468
ENSCSAG00000000991	ENSCSAT00000017542	63	65	49	68	56	289	217	342	401	55	57	57	100
ENSCSAG00000000992	ENSCSAT00000017541	163	139	161	120	149	701	356	688	359	425	350	358	322
ENSCSAG00000000993	ENSCSAT00000017540	1	0	0	0	0	0	0	0	0	0	0	0	0
ENSCSAG00000000994	ENSCSAT00000017539	0	0	0	0	0	0	0	0	0	0	0	0	0
ENSCSAG00000000995	ENSCSAT00000017538	861	868	867	814	815	964	785	1116	343	684	693	538	477
ENSCSAG00000000996	ENSCSAT00000017537	1	0	1	0	0	1	0	0	0	0	0	0	0
ENSCSAG00000000997	ENSCSAT00000017536	142	148	155	133	132	272	216	262	490	239	240	205	456
ENSCSAG00000000998	ENSCSAT00000017535	0	0	0	0	1	0	0	0	0	0	0	0	1
ENSCSAG00000000999	ENSCSAT00000017534	121	154	157	147	148	187	152	215	310.65	163	136	137	197
ENSCSAG00000001000	ENSCSAT00000017533	423	406	445	425	517	569	416	629	705	555	584	505	713
ENSCSAG00000001001	ENSCSAT00000017532	0	0	0	0	0	0	0	0	0	0	0	0	0
ENSCSAG00000001002	ENSCSAT00000017531	901	853	884	814	898	760	591	769	963	507	572	468	773
ENSCSAG00000001003	ENSCSAT00000017530	3	1	0	1	0	3	0	3	1	0	0	1	1
ENSCSAG00000001004	ENSCSAT00000017529	700	761	843	774	977	626	486	684	1013	327	379	330	521
ENSCSAG00000001005	ENSCSAT00000017528	46	49	57	48	37	68	52	72	79	74	78	73	99
ENSCSAG00000001006	ENSCSAT00000017527	685	615	610	594	675	759	595	779	607	760	700	695	656
ENSCSAG00000001007	ENSCSAT00000017526	1368.56	1278.55	1323.16	1333	1167.51	1019.18	764.77	1090.51	1596.12	952.77	1006.85	860.28	1395.57
ENSCSAG00000001008	ENSCSAT00000017525	1132	1217	1182	1221	1172	903	693	909	1850.99	1105	1179	1039	2719
ENSCSAG00000001009	ENSCSAT00000017524	511	499	525	498	267	272	204	331	439	561	636	580	887
ENSCSAG00000001010	ENSCSAT00000017523	156	140	173	167	124	102	108	121	261	121	153	108	254
ENSCSAG00000001011	ENSCSAT00000017522	964	933	1020	909	742	672	595	832	699	717	813	711	751
ENSCSAG00000001012	ENSCSAT00000017521	383	370	417	410	478	388	238	370	299	170	158	142	144
ENSCSAG00000001013	ENSCSAT00000017520	2	1	0	0	0	0	0	1	1	0	4	0	0
ENSCSAG00000001014	ENSCSAT00000017519	284.38	312	373	291	357	467	295	423	563	277	289	232	402
ENSCSAG00000001015	ENSCSAT00000017518	7	8	11	11	11	4	4	6	6	3	2	3	7
ENSCSAG00000001016	ENSCSAT00000017517	362	350	405	366	408	369	285	390	742	203	231	200	352
ENSCSAG00000001017	ENSCSAT00000017516	307	256	322	308	257	301	233	320	279	164	142	156	150
ENSCSAG00000001018	ENSCSAT00000017515	1434	1451	1578	1448	1502	1312	1041	1522	1677	1288	1361	1209	1600
ENSCSAG00000001019	ENSCSAT00000017514	0	0	0	0	0	0	0	0	0	0	0	0	0
ENSCSAG00000001020	ENSCSAT00000017513	0	0	0	1	1	0	2	1	1	0	0	0	0
ENSCSAG00000001021	ENSCSAT00000017512	1147.24	1173.63	1195.54	1243.58	1078.66	1356.55	923.49	1349.62	1053.43	1049.42	1084.46	956.92	1051.47
ENSCSAG00000001022	ENSCSAT00000017511	1226	1265	1265	1239	1090	1330	875	1313	1128	967	868	833	732
ENSCSAG00000001023	ENSCSAT00000017510	441	423	462	427	464	283	227	334	391	272	288	239	357
ENSCSAG00000001024	ENSCSAT00000017509	389	392	442	412	302	692	499	824	449	861	877	765	623
ENSCSAG00000001025	ENSCSAT00000017508	5	1	4	3	1	5	3	8	10	1	3	1	2
ENSCSAG00000001026	ENSCSAT00000017507	0	0	0	0	0	1	1	0	1	2	2	2	2
ENSCSAG00000001027	ENSCSAT00000017506	590	563	597	545	463	1540	1261	1804	1531	1232	1315	1158	1438
ENSCSAG00000001028	ENSCSAT00000017505	1985	2032	2022	1988	1773	1974	1498	2078	1859	1815	1855	1551	1734
ENSCSAG00000001029	ENSCSAT00000017504	0	0	0	0	0	0	0	0	0	0	0	0	0
ENSCSAG00000001030	ENSCSAT00000017503	190	170	181	156	218	92	65	106	101	73	86	55	59
ENSCSAG00000001031	ENSCSAT00000017502	882	934	946	876	1033	663	524	665	954	387	408	369	517
ENSCSAG00000001032	ENSCSAT00000017501	424.91	412.96	426.99	435.86	450.17	327.93	291.63	378.28	538.08	282.4	299.59	241.59	402.95
ENSCSAG00000001033	ENSCSAT00000017500	409.09	395.04	397.01	373.14	432.83	327.07	235.37	307.72	620.92	248.6	285.41	228.41	389.05
ENSCSAG00000001034	ENSCSAT00000017499	0	0	0	0	0	1	0	1	0	0	2.07	1.01	0
ENSCSAG00000001035	ENSCSAT00000017498	139	120	153	134	156	177	122	205	244	589	614.93	570.99	861
ENSCSAG00000001036	ENSCSAT00000017497	75.47	79.89	82.22	86.76	82.81	4	3	0	5	1	0	0	1
ENSCSAG00000001037	ENSCSAT00000017496	0	1	0	0	0	0	0	0	0	0	0	0	0
ENSCSAG00000001038	ENSCSAT00000017495	399	422	394	429.91	569	463	374	491	814	424	480	388	704
ENSCSAG00000001039	ENSCSAT00000017494	11	14	14	14	14	46	19	44	19	10	6	9	6
ENSCSAG00000001040	ENSCSAT00000017493	146.53	173.11	157.78	148.24	109.19	425	246	399	237	132	152	146	158
ENSCSAG00000001041	ENSCSAT00000017492	104	84	96	91	60	71	46	69	72	83	84	69	104
ENSCSAG00000001042	ENSCSAT00000017491	820.98	837.98	934	818	1034	1303.98	1012.99	1361.97	2217.98	1328	1388.98	1123.99	1910.99
ENSCSAG00000001043	ENSCSAT00000017490	2487	2421	2536	2411	2281	1857	1611	2193	2020	1256	1323	1223	1346
ENSCSAG00000001044	ENSCSAT00000017489	174	149	183	165	137	184	146	205	234	133	164	140	204
ENSCSAG00000001045	ENSCSAT00000017488	394	379	443	410	408	309	333	430	157	374	393	342	251
ENSCSAG00000001046	ENSCSAT00000017487	465	478	519	523	581	711	526	856	319	678	624	578	473
ENSCSAG00000001047	ENSCSAT00000017486	58	34	52	60	42	79	61	78	174	56	57	46	114
ENSCSAG00000001048	ENSCSAT00000017485	56	46	59	59	81	113	64	90	93	73	60	57	72
ENSCSAG00000001049	ENSCSAT00000017484	16	12	10	10	6	41	14	30	27	35	25	21	58
ENSCSAG00000001050	ENSCSAT00000017483	1640	1668	1663	1688	1701	1344	1165	1485	1833	1321	1359	1202	1758
ENSCSAG00000001051	ENSCSAT00000017482	0	0	0	0	0	0	0	0	0	0	0	0	0
ENSCSAG00000001052	ENSCSAT00000017481	0	0	0	0	0	0	0	0	0	1	1	1	0
ENSCSAG00000001053	ENSCSAT00000017480	2016.96	1994.16	2123.97	2116.9	1984.95	1535.99	1264.97	1688.06	1737.95	1022.96	1053.95	884.95	1114.97
ENSCSAG00000001054	ENSCSAT00000017479	0	0	0	0	0	0	0	0	1	0	0	0	0
ENSCSAG00000001055	ENSCSAT00000017478	0	0	0	0	0	0	0	0	0	0	0	0	0
ENSCSAG00000001056	ENSCSAT00000017477	1036	1055	1030	1103	927	1067	895	1160	1310	1231	1250	1073	1523
ENSCSAG00000001057	ENSCSAT00000017476	14	15	17	9	8	23	25	23	23	5	18	10	12
ENSCSAG00000001058	ENSCSAT00000017475	63	53	60	65	40	75	56	85	36	44	48	32	36
ENSCSAG00000001059	ENSCSAT00000017474	737	752	700	785	811	751	609	773	1124	818	857	741	1369
ENSCSAG00000001060	ENSCSAT00000017473	83	86	81	81	75	112	97	140	93	85	86	75	96
ENSCSAG00000001061	ENSCSAT00000017472	2457	2435	2599	2439.28	2039	3173	2350	3433.53	3339	3229	3231	2894	4353
ENSCSAG00000001062	ENSCSAT00000017471	1697	1685	1719	1660.72	1162	677	560	794.47	793	752	845	673	781
ENSCSAG00000001063	ENSCSAT00000017470	452	472	479	433	385	564	342	536	561	350	348	322	347
ENSCSAG00000001064	ENSCSAT00000017469	124	118	132	119	104	124	79	107	118	26	30	26	37
ENSCSAG00000001065	ENSCSAT00000017468	2	2	6	3	2	2	5	11	10	6	10	6	6
ENSCSAG00000001066	ENSCSAT00000017467	437	456	424	479	437	570	401	593	1008	476	467	455	739
ENSCSAG00000001067	ENSCSAT00000017466	186	201	202	207	210	260	203	263	387	365	411	338	487
ENSCSAG00000001068	ENSCSAT00000017465	1370	1370	1491	1476	1503	1226	1003	1263	1497	1386	1505	1206	1650
ENSCSAG00000001069	ENSCSAT00000017464	59	50	49	49	40	77	34	55	64	80	89	67	124
ENSCSAG00000001070	ENSCSAT00000017463	19	15	26	23	15	25	26	39	10	29	35	23	31
ENSCSAG00000001071	ENSCSAT00000017462	303	303	289	262	269	430	292	466	474	548	572	537	799
ENSCSAG00000001072	ENSCSAT00000017461	0	0	0	1	0	2	1	0	0	0	0	2	0
ENSCSAG00000001073	ENSCSAT00000017460	553	498	574	523	601	903	703	975	953	499	523	433	594
ENSCSAG00000001074	ENSCSAT00000017459	90	84	57	84	62	66	67	66	22	58	47	34	27
ENSCSAG00000001075	ENSCSAT00000017458	23	22	32	28	34	29	27	34	9	60	57	49	21
ENSCSAG00000001076	ENSCSAT00000017457	2	5	7	5	10	7	2	8	10	2	9	2	3
ENSCSAG00000001077	ENSCSAT00000017456	124	101	120	131	130	97	81	111	136	100	113	99	173
ENSCSAG00000001078	ENSCSAT00000017455	17	15	19	12	5	5	2	4	4	0	2	5	4
ENSCSAG00000001079	ENSCSAT00000017454	2	5	2	1	2	2	3	3	3	0	1	1	1
ENSCSAG00000001080	ENSCSAT00000017453	312	310	310	306	288	336	261	361	640	331	389	332	608
ENSCSAG00000001081	ENSCSAT00000017452	380	390	370	401	272	265	215	311	146	188	172	163	154
ENSCSAG00000001082	ENSCSAT00000017451	8734	8848	9168	8935	8965	8615	6168	8899	9945	4861	4838	4191	4898
ENSCSAG00000001083	ENSCSAT00000017450	1622	1625	1713	1511	1521	1382	1144	1564	1099	1122	1213	1005	980
ENSCSAG00000001084	ENSCSAT00000017449	1061	1060	1146	1028	974	1126	846	1257	741	1100	1233	1041	1056
ENSCSAG00000001085	ENSCSAT00000017448	414	375	428	421	554	574	405	625	633	584	512	468	645
ENSCSAG00000001086	ENSCSAT00000017447	2	1	0	0	1	0	0	2	0	0	0	0	0
ENSCSAG00000001087	ENSCSAT00000017446	2697	2756	2804	2694	2827	1811	1520	2124	3135	2030	2216	1805	3031
ENSCSAG00000001088	ENSCSAT00000017445	1195	1196	1318	1207	1703	695	549	815	807	290	271	295	225
ENSCSAG00000001089	ENSCSAT00000017444	120	110	117	102	175	62	53	61	124	34	38	40	33
ENSCSAG00000001090	ENSCSAT00000017443	367	349	364	366	243	329	250	378	82	254	236	203	146
ENSCSAG00000001091	ENSCSAT00000017442	533	482	539	462	442	416	384	552	88	372	413	328	164
ENSCSAG00000001092	ENSCSAT00000017441	129	123	138	113	147	131	100	172	72	150	163	123	109
ENSCSAG00000001093	ENSCSAT00000017440	18	18	30	24	19	16	6	12	18	13	14	8	24
ENSCSAG00000001094	ENSCSAT00000017439	429	407	487	456	471	547	389	533	857	538	558	434	751
ENSCSAG00000001095	ENSCSAT00000017438	0	1	2	1	1	0	0	0	0	0	1	0	1
ENSCSAG00000001096	ENSCSAT00000017437	1113	1030	1093	1095	1152	943	764	993	1617	1014	1050	986	1738
ENSCSAG00000001097	ENSCSAT00000017436	1921	1842	1969	2031	2179	2248	1632	2408	2738	1503	1601	1473	1870
ENSCSAG00000001098	ENSCSAT00000017435	4528	4661	4957	4589	4056	3462	2522	3737	2909	2279	2337	2049	2075
ENSCSAG00000001099	ENSCSAT00000017434	106.29	95.29	94.62	115.97	151.82	256.94	196.23	247.92	514.41	227.39	246.08	236.37	474.25
ENSCSAG00000001100	ENSCSAT00000017433	96.71	100.71	111.38	84.03	60.18	118.06	65.77	106.08	78.59	96.61	62.92	60.63	102.75
ENSCSAG00000001101	ENSCSAT00000017432	1094	998	1054	1024	1350	1733	1295	1866	1612	1077	1069	944	1269
ENSCSAG00000001102	ENSCSAT00000017431	59	87	89	60	61	126	71	142	172	119	116	92	177
ENSCSAG00000001103	ENSCSAT00000017430	1549	1498	1588	1514	1697	1124	744	1137	1851	1007	1079	900	1553
ENSCSAG00000001104	ENSCSAT00000017429	0	0	1	0	0	0	0	0	0	0	0	1	0
ENSCSAG00000001105	ENSCSAT00000017428	0	0	0	0	0	0	0	0	0	26	37	22	11
ENSCSAG00000001106	ENSCSAT00000017427	145	128	133	131	81	326	148	319	238	706	650	619	339
ENSCSAG00000001107	ENSCSAT00000017426	254	258	298	260	259	238	176	277	255	231	235	225	298
ENSCSAG00000001108	ENSCSAT00000017425	377	374	390	428	383	350	286	369	408	273	304	273	310
ENSCSAG00000001109	ENSCSAT00000017424	13.77	12.71	17.91	17.02	29.66	25.54	8.41	28.76	27.31	14.63	13.8	25.42	14
ENSCSAG00000001110	ENSCSAT00000017423	1375.23	1284.29	1398.09	1372.98	2028.34	1054.46	787.59	1088.24	1131.69	918.37	985.2	869.58	1020
ENSCSAG00000001111	ENSCSAT00000017422	0	0	0	0	0	0	0	0	0	0	0	1	0
ENSCSAG00000001112	ENSCSAT00000017421	270	227	253	228	267	211	128	185	239	140	145	142	182
ENSCSAG00000001113	ENSCSAT00000017420	905	882	886	878	964	619	489	706	808	246	276	242	245
ENSCSAG00000001114	ENSCSAT00000017419	29	26	22	27	19	37	31	42	23	80	85	90	99
ENSCSAG00000001115	ENSCSAT00000017418	115.34	127.94	123.97	110.72	143.12	149.47	115.67	187.5	93.84	73.86	87.61	65.05	81.56
ENSCSAG00000001116	ENSCSAT00000017417	652.78	680.05	714.99	746.07	909.52	749.62	559.69	772.71	1100.46	503.09	488.51	457.12	742.13
ENSCSAG00000001117	ENSCSAT00000017416	239.88	225.01	251.04	272.21	294.36	328.91	271.63	322.79	636.7	404.04	397.88	312.83	714.31
ENSCSAG00000001118	ENSCSAT00000017415	166	151	154	137	140	140	92	187	45	93	114	93	56
ENSCSAG00000001119	ENSCSAT00000017414	393	348	392	359	339	251	188	296	200	247	267	214	210
ENSCSAG00000001120	ENSCSAT00000017413	1815	1703	1806	1791	2018	1311	1078	1455	1473	968	1002	855	1060
ENSCSAG00000001121	ENSCSAT00000017412	217	200	230	211	188	366	223	355	522	144	151	126	185
ENSCSAG00000001122	ENSCSAT00000017411	515	471	533	466	617	474	357	460	637	322	316	282	404
ENSCSAG00000001123	ENSCSAT00000017410	722	693	693	707	689	785	578	785	1168	1323	1482	1192	2242
ENSCSAG00000001124	ENSCSAT00000017409	651	636	643	643	665	471	384	477	730	454	472	433	803
ENSCSAG00000001125	ENSCSAT00000017408	1	0	1	0	1	3	1	1	1	0	0	0	0
ENSCSAG00000001126	ENSCSAT00000017407	1090	994	1092	998	1069	1190	834	1249	1453	1002	993	884	1325
ENSCSAG00000001127	ENSCSAT00000017406	1132	1077	1152	1097	1116	1319	1183	1757	176	780	731	622	167
ENSCSAG00000001128	ENSCSAT00000017405	8293	8507	8768	8112	7488	9345	7417	11380	4850	6796	6568	6018	3816
ENSCSAG00000001129	ENSCSAT00000017404	0	0	0	0	0	0.18	0	0	0	0	0	0	0
ENSCSAG00000001130	ENSCSAT00000017403	67	63	76	75.97	40	14.82	15	27	20	0	1	1	0
ENSCSAG00000001131	ENSCSAT00000017402	385	374	403	429	412	278	240	290	392	235	259	228	351
ENSCSAG00000001132	ENSCSAT00000017401	35	35	40	34	31	10	7	16	7	2	5	1	11
ENSCSAG00000001133	ENSCSAT00000017400	0	1	2	0	0	1	1	0	1	3	0	1	0
ENSCSAG00000001134	ENSCSAT00000017399	244	261	292	263	314	262	208	280	299	151	150	145	166
ENSCSAG00000001135	ENSCSAT00000017398	2453	2420	2545	2351	2727	1738	1265	1858	2083	839	802	776	793
ENSCSAG00000001136	ENSCSAT00000017397	2	0	5	3.03	4	1	0	0	0	1	0	0	2
ENSCSAG00000001137	ENSCSAT00000017396	182	191	205	177	216	149	120	158	169	84	84	73	92
ENSCSAG00000001138	ENSCSAT00000017395	96	105	101	81	94	37	33	39	37	24	32	17	36
ENSCSAG00000001139	ENSCSAT00000017394	155	154	187	169	251	104	68	119	122	113	134	81	94
ENSCSAG00000001140	ENSCSAT00000017393	6445.83	6529.73	6899.79	6603.01	7814.99	4789.07	4078.89	5638.83	6643.95	5691.15	6183.63	5241.85	6847.7
ENSCSAG00000001141	ENSCSAT00000017392	949.17	948.27	939.21	913.99	527.01	599.93	554.11	699.17	705.05	788.85	855.37	670.15	815.3
ENSCSAG00000001142	ENSCSAT00000017391	0	0	0	0	0	0	0	0	0	0	0	0	0
ENSCSAG00000001143	ENSCSAT00000017390	801	869	854	817	667	598	465	686	408	607	575	492	433
ENSCSAG00000001144	ENSCSAT00000017389	0	0	0	0	0	0	0	1	1	0	0	0	0
ENSCSAG00000001145	ENSCSAT00000017388	1764	1882	1838	1831	2077	1492	1195	1649	2109	1717	1729	1513	1787
ENSCSAG00000001146	ENSCSAT00000017387	3	4	4	2	5	2	2	0	0	0	0	0	0
ENSCSAG00000001147	ENSCSAT00000017386	262	266	280	246	298	208	207	254	211	110	148	135	158
ENSCSAG00000001148	ENSCSAT00000017385	44	36	55	37	41	47	44	58	55	11	17	9	20
ENSCSAG00000001149	ENSCSAT00000017384	69	63	77	57	55	102	67	86	85	59	74	60	71
ENSCSAG00000001150	ENSCSAT00000017383	36	25	34	23	21	38	21	16	22	19	24	22	38
ENSCSAG00000001151	ENSCSAT00000017382	58	63	78	54	50	39	44	65	14	20	21	29	16
ENSCSAG00000001152	ENSCSAT00000017381	300	293	315	286	368	354	287	354	366	280	311	279	353
ENSCSAG00000001153	ENSCSAT00000017380	6	2	4	1	2	0	2	1	1	0	1	0	0
ENSCSAG00000001154	ENSCSAT00000017379	3595	3567	3801	3616	4858	1736	1221	1788	1984	906	993	849	982
ENSCSAG00000001155	ENSCSAT00000017378	3	1	7	5	5	14	10	16	15	4	2	4	6
ENSCSAG00000001156	ENSCSAT00000017377	291	327	361	271	278	523	367	599	347	363	418	354	464
ENSCSAG00000001157	ENSCSAT00000017376	187	168	189	169	178	57	40	71	75	49	53	63	59
ENSCSAG00000001158	ENSCSAT00000017375	30	20	17	18	22	3	7	3	9	1	0	3	0
ENSCSAG00000001159	ENSCSAT00000017374	301	284	280	254	272	593	467	777	309	358	351	303	198
ENSCSAG00000001160	ENSCSAT00000017373	0	0	0	0	0	0	0	0	0	0	0	0	2
ENSCSAG00000001161	ENSCSAT00000017372	0	0	0	0	0	0	0	0	0	0	0	0	0
ENSCSAG00000001162	ENSCSAT00000017371	897	945	849	899	837	801	518	823	705	606	606	568	591
ENSCSAG00000001163	ENSCSAT00000017370	50	46	56	48	59	38	28	56	62	62	84	64	77
ENSCSAG00000001164	ENSCSAT00000017369	24	37	30	29	33	29	18	23	30	40	28	29	58
ENSCSAG00000001165	ENSCSAT00000017368	326	331	382	343	363	365	281	368	550	505	536	395	898
ENSCSAG00000001166	ENSCSAT00000017367	82	85	82	88	44	151	106	152	158	82	88	79	136
ENSCSAG00000001167	ENSCSAT00000017366	641	668	702	742	704	388	291	411	666	174	205	181	307
ENSCSAG00000001168	ENSCSAT00000017365	12228	12261	12773	12734	13824	8714	6239	8755	13914	6008	6474	5508	8742
ENSCSAG00000001169	ENSCSAT00000017364	0	0	1	0	0	0	0	1	1	1	0	0	0
ENSCSAG00000001170	ENSCSAT00000017363	534	548	579	487	523	609	469	668	626	632	579	582	589
ENSCSAG00000001171	ENSCSAT00000017362	33	40	47	51	48	44	32	46	70	66	68	42	99
ENSCSAG00000001172	ENSCSAT00000017361	7	7	6	9	9	9	4	4	19	5	9	7	20
ENSCSAG00000001173	ENSCSAT00000017360	23	18	15	19	26	26	17	25	17	25	29	21	25
ENSCSAG00000001174	ENSCSAT00000017359	32	43	45	31	23	42	37	48	44	34	29	39	41
ENSCSAG00000001175	ENSCSAT00000017358	1989	2132	2252	2088	2355	1535	1313	1749	2523	1068	1095	985	936
ENSCSAG00000001176	ENSCSAT00000017357	1	0	1	0	0	0	0	1	0	0	0	0	2
ENSCSAG00000001177	ENSCSAT00000017356	1190	1144	1316	1216	1415	939	738	985	1547	760	816	763	1171
ENSCSAG00000001178	ENSCSAT00000017355	2	4	5	0	3	6	4	4	2	1	3	1	5
ENSCSAG00000001179	ENSCSAT00000017354	1	0	3	1	1	1	1	0	0	349	389	313	765
ENSCSAG00000001180	ENSCSAT00000017353	4	2	5	8	2	2	3	3	5	51	33	33	44
ENSCSAG00000001181	ENSCSAT00000017352	3	0	4	3	4	3	2	2	1	2	3	2	5
ENSCSAG00000001182	ENSCSAT00000017351	2025	2106	2178	2101	2021	1653	1293	1897	2519	2416.65	2537.65	2108	3018
ENSCSAG00000001183	ENSCSAT00000017350	168	149	144	177	189	156	110	156	180	185.35	200.35	157	241
ENSCSAG00000001184	ENSCSAT00000017349	69.62	88	87.73	74.43	77.94	119.94	66.94	114.86	138.49	144.8	168.88	138.61	245.17
ENSCSAG00000001185	ENSCSAT00000017348	926.38	870	984.27	827.57	662.06	1406.06	706.06	1266.14	559.51	940.2	785.12	793.39	652.83
ENSCSAG00000001186	ENSCSAT00000017347	1380	1329	1439	1365	1242	823	703	920	552	1093	1091	1053	830
ENSCSAG00000001187	ENSCSAT00000017346	750	739	838	711	574	666	539	797	475	647	621	533	609
ENSCSAG00000001188	ENSCSAT00000017345	45	38	47	31	41	66	48	64	56	26	32	35	51
ENSCSAG00000001189	ENSCSAT00000017344	1	0	0	0	0	1	0	0	1	0	0	0	0
ENSCSAG00000001190	ENSCSAT00000017343	460	431	468	437	517	606	429	652	649	557	551	477	599
ENSCSAG00000001191	ENSCSAT00000017342	333	311	336	318	432	264	206	277	371	169	169	143	212
ENSCSAG00000001192	ENSCSAT00000017341	547	568	554	577	673	514	442	557	1064	1197	1184	1069	2049
ENSCSAG00000001193	ENSCSAT00000017340	177	220	244	179	216	199	131	214	226	138	133	118	199
ENSCSAG00000001194	ENSCSAT00000017339	78	61	57	62	38	144	87	117	166	86	91	84	122
ENSCSAG00000001195	ENSCSAT00000017338	15	16	16	12	10	13	7	5	6	4	2	1	3
ENSCSAG00000001196	ENSCSAT00000017337	0	0	0	0	0	0	0	0	0	0	0	0	0
ENSCSAG00000001197	ENSCSAT00000017336	299	260	306	293	288	304	207	309	473	209	228	189	295
ENSCSAG00000001198	ENSCSAT00000017335	580	548	601	535	563	566	355	591	732	436	467	356	716
ENSCSAG00000001199	ENSCSAT00000017334	765	846	819	866	734	928	596	888	1012	845	821	683	1123
ENSCSAG00000001200	ENSCSAT00000017333	55	50	59	79	60	85	71	87	129	129	123	110	207
ENSCSAG00000001201	ENSCSAT00000017332	8	8	13	17	15	8	12	16	18	5	8	5	16
ENSCSAG00000001202	ENSCSAT00000017331	1445	1446	1508	1416	1538	1026	882	1155	1423	399	447	404	385
ENSCSAG00000001203	ENSCSAT00000017330	8640	8385	9065	8845	8365	6883	4833	6991	12776	4316	4506	3751	9524
ENSCSAG00000001204	ENSCSAT00000017329	6	3	6	9	9	9	4	7	15	3	7	4	2
ENSCSAG00000001205	ENSCSAT00000017328	57	58	54	47	73	87	56	92	122	82	79	80	84
ENSCSAG00000001206	ENSCSAT00000017327	2	1	0	0	3	3	0	2	1	1	3	1	5
ENSCSAG00000001207	ENSCSAT00000017326	10	20	32	17	15	14	10	8	8	2	1	1	3
ENSCSAG00000001208	ENSCSAT00000017325	190	197	183	227	161	151	111	162	247	62	70	52	74
ENSCSAG00000001209	ENSCSAT00000017324	290	303	296	306	309	364	235	361	252	416	436	364	462
ENSCSAG00000001210	ENSCSAT00000017323	230	271	304	284	272	251	238	284	443	385	414	363	607
ENSCSAG00000001211	ENSCSAT00000017322	72	56	98	79	77	234	201	263	203	451	455	417	518
ENSCSAG00000001212	ENSCSAT00000017321	118	128	128	122	119	106	82	139	149	61	65	56	95
ENSCSAG00000001213	ENSCSAT00000017320	157.39	150.89	178.12	178.14	229.99	144.95	101.86	159.33	200.53	83.46	81.35	77.06	96.01
ENSCSAG00000001214	ENSCSAT00000017319	26.61	25.11	29.88	24.86	18.01	31.05	31.14	47.67	28.47	20.54	21.65	15.94	16.99
ENSCSAG00000001215	ENSCSAT00000017318	41.17	60.13	50.33	53.19	55.27	47.09	28.13	48.31	42.19	28.06	20.04	26.12	37.08
ENSCSAG00000001216	ENSCSAT00000017317	14609.8	14783.9	15576.7	16145.8	17757.7	10507.9	8461.87	10695.7	19188.8	11100.9	11653	9533.88	15049.9
ENSCSAG00000001217	ENSCSAT00000017316	514	469	515	544	612	406	350	437	801	729	811	687	1416
ENSCSAG00000001218	ENSCSAT00000017315	4104	4145	4188	4271	4187	2338	1810	2435	3766	1653	1739	1426	1941
ENSCSAG00000001219	ENSCSAT00000017314	7	1	10	6	1	5	8	5	9	8	2	8	5
ENSCSAG00000001220	ENSCSAT00000017313	0	0	1	1	1	2	0	0	1	1	0	1	2
ENSCSAG00000001221	ENSCSAT00000017312	668	685	663	678	657	795	495	781	974	802	767	664	998
ENSCSAG00000001222	ENSCSAT00000017311	253	284	287	286	299	215	162	216	265	128	189	135	211
ENSCSAG00000001223	ENSCSAT00000017310	201	212	219	230	210	171	135	201	143	202	205	163	176
ENSCSAG00000001224	ENSCSAT00000017309	1273	1201	1312	1176	1267	1203	873	1283	784	1186	1231	1107	1013
ENSCSAG00000001225	ENSCSAT00000017308	78	79	77	92	101	202	201	277	125	164	199	184	184
ENSCSAG00000001226	ENSCSAT00000017307	5	8	10	11	9	28	16	32	57	206	198	185	491
ENSCSAG00000001227	ENSCSAT00000017306	664	635	716	669	850	991	702	1043	1128	805	823	720	1081
ENSCSAG00000001228	ENSCSAT00000017305	5	12	12	18	12	20	13	12	16	8	11	10	9
ENSCSAG00000001229	ENSCSAT00000017304	897.07	935.96	1025.48	890.29	1007.04	702.5	397.59	679.02	731.47	315.66	279.39	239.41	291.89
ENSCSAG00000001230	ENSCSAT00000017303	1006.93	993.04	1092.52	1055.71	1161.96	1029.5	830.41	1150.98	1322.53	836.34	877.61	803.59	1070.11
ENSCSAG00000001231	ENSCSAT00000017302	378	379	437.33	394.1	390.2	274.08	238.23	338.1	582	287.2	328.12	248	581.11
ENSCSAG00000001232	ENSCSAT00000017301	143	140	156	141	143	160	115	161	86	170	154	129	127
ENSCSAG00000001233	ENSCSAT00000017300	210	188	195	201	166	283	135	279	301	319	328	267	567
ENSCSAG00000001234	ENSCSAT00000017299	0	0	0	0	0	0	0	0	0	0	0	0	1
ENSCSAG00000001235	ENSCSAT00000017298	18	11	14	12	13	9	3	13	9	5	12	8	9
ENSCSAG00000001236	ENSCSAT00000017297	0	0	0	0	0	0	0	0	0	0	0	0	0
ENSCSAG00000001237	ENSCSAT00000017296	125	100	128	102	124	88	59	111	99	99	77	69	101
ENSCSAG00000001238	ENSCSAT00000017295	11	11	15	6	10	23	16	16	11	17	14	15	19
ENSCSAG00000001239	ENSCSAT00000017294	527	515	500	530	529	477	300	472	394	279	295	244	312
ENSCSAG00000001240	ENSCSAT00000017293	2	1	2	1	0	2	0	2	3	2	0	1	1
ENSCSAG00000001241	ENSCSAT00000017292	812	848	838	802	865	850	651	856	516	792	819	709	710
ENSCSAG00000001242	ENSCSAT00000017291	0	0	0	0	0	2	1	2	1	88	121	95	166
ENSCSAG00000001243	ENSCSAT00000017290	0	0	0	0	0	0	0	0	0	0	0	0	0
ENSCSAG00000001244	ENSCSAT00000017289	0	0	0	0	0	0	0	0	0	1	0	0	0
ENSCSAG00000001245	ENSCSAT00000017288	0	0	0	0	0	0	0	0	0	41	53	47	74
ENSCSAG00000001246	ENSCSAT00000017287	167	171	203	178	142	340	271	368	365	1455	1500	1394	2292
ENSCSAG00000001247	ENSCSAT00000017286	22	26	14	17	26	32	25	27	13	41	51	36	30
ENSCSAG00000001248	ENSCSAT00000017285	622	684	728	648	722	434	394	536	323	236	238	231	160
ENSCSAG00000001249	ENSCSAT00000017284	1157	1249	1221	1108	1455	1088	815	1190	1581	1544	1648	1416	2264
ENSCSAG00000001250	ENSCSAT00000017283	771	765	848	733	817	256	254	309	222	1395	1532	1250	1952
ENSCSAG00000001251	ENSCSAT00000017282	56	73	80	66	61	83	63	92	69	121	142	106	161
ENSCSAG00000001252	ENSCSAT00000017281	0	0	0	0	0	0	0	0	0	0	0	0	1
ENSCSAG00000001253	ENSCSAT00000017280	5	5	5	2	6	1	1	0	0	10	11	6	16
ENSCSAG00000001254	ENSCSAT00000017279	118	115	145	116	103	207	153	235	194	183	197	154	235
ENSCSAG00000001255	ENSCSAT00000017278	1	0	0	0	0	0	0	0	0	0	0	0	0
ENSCSAG00000001256	ENSCSAT00000017277	28	22	18	14	21	30	18	28	31	18	18	13	31
ENSCSAG00000001257	ENSCSAT00000017276	0	0	0	0	0	0	0	0	0	0	0	0	0
ENSCSAG00000001258	ENSCSAT00000017275	174.86	206.09	198.98	210.43	186.55	168.93	124.68	197.2	234.49	182.13	174.11	142.53	238.22
ENSCSAG00000001259	ENSCSAT00000017274	0	0	0	0	1	0	0	0	0	1	0	0	0
ENSCSAG00000001260	ENSCSAT00000017273	978	901	1050	938	905	917	685	1038	1052	633	638	560	832
ENSCSAG00000001261	ENSCSAT00000017272	183	226	214	217	232	303	213	285	549	98	116	80	119
ENSCSAG00000001262	ENSCSAT00000017271	0	0	0	0	0	0	0	0	0	0	0	0	0
ENSCSAG00000001263	ENSCSAT00000017270	1586	1491	1618	1517	1498	1019	750	1044	1315	1207	1285	1069	1741
ENSCSAG00000001264	ENSCSAT00000017269	1472	1490	1497	1400	1421	1705	1271	1737	2206	1724	1902	1659	2657
ENSCSAG00000001265	ENSCSAT00000017268	314	321	353	308	325	296	240	270	395	567	554	448	788
ENSCSAG00000001266	ENSCSAT00000017267	1842	1992	1969	1974	2018	1892	1546	2160	2089	1769	1977	1728	2277
ENSCSAG00000001267	ENSCSAT00000017266	1764	1696	1867	1826	1778	1286	1121	1564	1561	1962	2071	1712	2244
ENSCSAG00000001268	ENSCSAT00000017265	3667	3621	3734	3646	3807	3109	2515	3397	2838	3256	3536	3081	3295
ENSCSAG00000001269	ENSCSAT00000017264	20	20	12	19	11	2	0	7	3	9	10	10	6
ENSCSAG00000001270	ENSCSAT00000017263	625	626	674	655	628	672	453	660	1055	623	710	580	997
ENSCSAG00000001271	ENSCSAT00000017262	792	799	796	803	828	826	582	867	1084	664	713	578	1152
ENSCSAG00000001272	ENSCSAT00000017261	1	0	0	0	0	0	0	0	0	0	0	0	0
ENSCSAG00000001273	ENSCSAT00000017260	423	426	412	419	367	539	470	622	287	441	474	383	389
ENSCSAG00000001274	ENSCSAT00000017259	406	399	446	388	416	571	463	633	601	642	680	527	832
ENSCSAG00000001275	ENSCSAT00000017258	663	682	721	669	913	398	330	486	472	233	222	184	158
ENSCSAG00000001276	ENSCSAT00000017257	174	166	179	163	176	145	94	168	178	107	122	106	141
ENSCSAG00000001277	ENSCSAT00000017256	1232	1228	1413	1239	1058	1094	825	1225	630	764	788	698	599
ENSCSAG00000001278	ENSCSAT00000017255	0	1	0	1	0	0	0	0	0	0	0	0	0
ENSCSAG00000001279	ENSCSAT00000017254	0	0	0	0	0	0	0	0	0	0	0	0	0
ENSCSAG00000001280	ENSCSAT00000017253	818	800	852	865	906	588	476	609	812	631	621	531	934
ENSCSAG00000001281	ENSCSAT00000017252	265	217	223	227	235	182	206	264	94	251	257	245	153
ENSCSAG00000001282	ENSCSAT00000017251	4	5	8	4	6	4	4	3	4	0	0	0	0
ENSCSAG00000001283	ENSCSAT00000017250	45	35	49	36	46	35	27	36	51	106	116	81	172
ENSCSAG00000001284	ENSCSAT00000017249	1545	1537	1681	1568	1673	1964	1496	2080	2708	2202	2508	2063	3742
ENSCSAG00000001285	ENSCSAT00000017248	0	1	2	2	0	0	1	1	0	0	0	1	0
ENSCSAG00000001286	ENSCSAT00000017247	0	0	0	0	0	0	0	0	0	0	0	0	0
ENSCSAG00000001287	ENSCSAT00000017246	560.48	586.29	591.32	553.83	467.83	313.22	279.63	393.32	374.87	728.51	809.47	676.78	934.99
ENSCSAG00000001288	ENSCSAT00000017245	330.52	353.71	367.68	357.17	408.17	395.78	251.37	326.68	591.13	366.49	339.53	337.22	550.01
ENSCSAG00000001289	ENSCSAT00000017244	1053	1093	1104	1169	1216	670	493	720	1137	381	406	352	606
ENSCSAG00000001290	ENSCSAT00000017243	630	544	653	610	816	962	709	1162	755	800	801	695	567
ENSCSAG00000001291	ENSCSAT00000017242	0	0	0	0	0	0	0	0	0	0	0	0	0
ENSCSAG00000001292	ENSCSAT00000017241	29	32	59	39	17	33	33	27	19	10	10	5	7
ENSCSAG00000001293	ENSCSAT00000017240	1322	1352	1378	1295	1251	631	483	626	757	432	446	380	392
ENSCSAG00000001294	ENSCSAT00000017239	203	191	221	207	232	201	142	196	302	247	256	201	302
ENSCSAG00000001295	ENSCSAT00000017238	67	79	85	85	93	48	42	74	114	61	69	51	112
ENSCSAG00000001296	ENSCSAT00000017237	156	170	152	142	159	120	90	113	198	77	86	83	162
ENSCSAG00000001297	ENSCSAT00000017236	666	653	716	653	724	460	361	518	740	315	355	304	411
ENSCSAG00000001298	ENSCSAT00000017235	1	1	0	3.01	1	2	0	2	2	2.15	0	0	0
ENSCSAG00000001299	ENSCSAT00000017234	0	0	0	0	0	0	0	0	0	0	0	0	0
ENSCSAG00000001300	ENSCSAT00000017233	1133	1130	1144	1162	1041	1361	1117	1450	2251	3433	3724	3154	6242
ENSCSAG00000001301	ENSCSAT00000017232	143	152	187	138	160	171	129	170	204	91	86	64	122
ENSCSAG00000001302	ENSCSAT00000017231	0	0	0	0	0	0	0	0	0	0	0	0	0
ENSCSAG00000001303	ENSCSAT00000017230	161	141	183	150	175	116	98	136	168	71	67	48	101
ENSCSAG00000001304	ENSCSAT00000017229	1481	1432	1491	1409	1597	994	797	1140	1720	893	998	835	1275
ENSCSAG00000001305	ENSCSAT00000017228	0	0	0	0	0	0	0	0	0	0	0	0	0
ENSCSAG00000001306	ENSCSAT00000017227	40.8	52.31	42.4	36.67	52.64	34	32.33	48	49.53	54.68	42.89	29.13	62.98
ENSCSAG00000001307	ENSCSAT00000017226	37	38	35.76	34	55	53.77	42	58.78	40	60	54	53	71
ENSCSAG00000001308	ENSCSAT00000017225	24	18	19.24	28	38	28.23	22	29.22	35	26	34	24	54
ENSCSAG00000001309	ENSCSAT00000017224	1	3	4	2	2	3	1	2	2	2	3	2	1
ENSCSAG00000001310	ENSCSAT00000017223	576	543	608	577	726	481	347	501	653	384	409	362	502
ENSCSAG00000001311	ENSCSAT00000017222	0	0	0	0	0	0	0	0	0	0	0	0	0
ENSCSAG00000001312	ENSCSAT00000017221	0	2	0	0	4	1	0	1	2	5	2	3	0
ENSCSAG00000001313	ENSCSAT00000017220	647	603	671	557	1282	1823	1690	2196	899	1187	1212	982	776
ENSCSAG00000001314	ENSCSAT00000017219	0	3	0	3	0	0	0	0	0	0	0	0	0
ENSCSAG00000001315	ENSCSAT00000017218	0	1	0	0	0	0	0	0	0	0	0	0	0
ENSCSAG00000001316	ENSCSAT00000017217	10	11	14	12	7	4	6	0	7	0	0	0	1
ENSCSAG00000001317	ENSCSAT00000017216	1538	1512	1488	1446	1191	1073	836	1270	603	982	1013	881	728
ENSCSAG00000001318	ENSCSAT00000017215	29	39	26	39	42	48	56	63	37	228	241	233	198
ENSCSAG00000001319	ENSCSAT00000017214	435	451	453	402	484	241	259	285	96	400	362	329	206
ENSCSAG00000001320	ENSCSAT00000017213	3	5	3	7	6	4	3	10	13	12	18	21	16
ENSCSAG00000001321	ENSCSAT00000017212	0	0	0	0	0	0	0	0	0	1	0	0	0
ENSCSAG00000001322	ENSCSAT00000017211	2	4	4	2	1	0	1	2	0	0	2	0	0
ENSCSAG00000001323	ENSCSAT00000017210	804	742	775	765	1239	1259	1043	1515	1124	367	376	349	544
ENSCSAG00000001324	ENSCSAT00000017209	179	181	192	193	176	138	98	136	196	162	159	136	236
ENSCSAG00000001325	ENSCSAT00000017208	0	0	0	0	0	0	0	0	0	0	1	0	0
ENSCSAG00000001326	ENSCSAT00000017207	412	461	432	407	321	334	220	351	62	218	212	214	80
ENSCSAG00000001327	ENSCSAT00000017206	0	0	0	0	0	0	0	0	0	0	0	0	0
ENSCSAG00000001328	ENSCSAT00000017205	246	246	227	237	255	160	142	188	316	203	215	207	361
ENSCSAG00000001329	ENSCSAT00000017204	0	1	0	0	0	1	0	0	0	0	0	0	0
ENSCSAG00000001330	ENSCSAT00000017203	785	790	721	742	760	830	594	981	906	695	688	652	740
ENSCSAG00000001331	ENSCSAT00000017202	19	15	15	9	14	32	23	28	32	99	80	78	103
ENSCSAG00000001332	ENSCSAT00000017201	0	0	0	0	0	0	1	0	2	0	1	0	0
ENSCSAG00000001333	ENSCSAT00000017200	47	43	39	33	29	24	23	30	5	16	16	23	16
ENSCSAG00000001334	ENSCSAT00000017199	22	30	24	32	25	18	9	18	5	20	14	16	15
ENSCSAG00000001335	ENSCSAT00000017198	251	230	265	245	201	203	160	205	320	296	317	276	547
ENSCSAG00000001336	ENSCSAT00000017197	473	471	531	458	435	445	380	587	178	779	834	713	628
ENSCSAG00000001337	ENSCSAT00000017196	0	0	1	0	0	0	0	0	0	0	0	0	0
ENSCSAG00000001338	ENSCSAT00000017195	0	0	1	1	0	0	0	0	0	0	0	0	0
ENSCSAG00000001339	ENSCSAT00000017194	1345	1297	1371	1344	1572	1124	819	1198	1330	656	693	637	640
ENSCSAG00000001340	ENSCSAT00000017193	2	2	0	2	2	6	0	4	1	0	1	1	0
ENSCSAG00000001341	ENSCSAT00000017192	1213	1197	1131	1090	1118	946	811	1125	566	752	774	679	527
ENSCSAG00000001342	ENSCSAT00000017191	842	923	926	870	889	833	692	944	1100	561	607	516	725
ENSCSAG00000001343	ENSCSAT00000017190	220	232	256	214	297	311	203	314	350	189	206	174	204
ENSCSAG00000001344	ENSCSAT00000017189	196	269	257	259	268	280	169	287	361	141	133	101	212
ENSCSAG00000001345	ENSCSAT00000017188	132	131	151	141	130	138	111	164	185	106	123	108	166
ENSCSAG00000001346	ENSCSAT00000017187	703	707	715	666	785	656	591	762	910	1029	1019	895	1105
ENSCSAG00000001347	ENSCSAT00000017186	124	134	142	137	156	172	159	213	132	119	118	110	112
ENSCSAG00000001348	ENSCSAT00000017185	0	0	0	0	0	0	0	0	0	0	0	0	0
ENSCSAG00000001349	ENSCSAT00000017184	1037	1084	1080	1010	698	2251	1765	2490	1467	1464	1452	1290	1204
ENSCSAG00000001350	ENSCSAT00000017183	427	403	403	378	329	662	547	810	309	352	397	332	307
ENSCSAG00000001351	ENSCSAT00000017182	2744	2827	2890	2660	2766	2324	1972	2753	1256	4216	4574	3806	3315
ENSCSAG00000001352	ENSCSAT00000017181	2628	2611	2667	2549	2046	1637	1325	1835	1375	1808	1916	1678	1887
ENSCSAG00000001353	ENSCSAT00000017180	6647	6721	6759	6759	5861	10052	6764	10237	9008	13789	13957	12221	18055
ENSCSAG00000001354	ENSCSAT00000017179	188	198	167	196	90	89	62	80	49	97	101	89	59
ENSCSAG00000001355	ENSCSAT00000017178	84	86	94	93	100	41	35	56	36	18	18	14	26
ENSCSAG00000001356	ENSCSAT00000017177	0	0	0	0	0	0	0	1	0	0	0	0	0
ENSCSAG00000001357	ENSCSAT00000017176	0	0	0	0	0	0	0	0	0	0	0	0	0
ENSCSAG00000001358	ENSCSAT00000017175	0	0	0	0	0	0	0	0	0	0	0	0	0
ENSCSAG00000001359	ENSCSAT00000017174	4	12	10	11	11	25	11	18	14	1	0	4	3
ENSCSAG00000001360	ENSCSAT00000017173	571	531	563	539	472	584	446	628	319	614	550	492	526
ENSCSAG00000001361	ENSCSAT00000017172	26	26	27	24	44	33	27	35	15	39	45	40	29
ENSCSAG00000001362	ENSCSAT00000017171	0	0	0	0	0	0	0	0	0	0	0	0	0
ENSCSAG00000001363	ENSCSAT00000017170	0	0	0	0	0	0	0	0	0	0	0	0	0
ENSCSAG00000001364	ENSCSAT00000017169	0	0	2	0	1	0	0	1	1	0	1	0	1
ENSCSAG00000001365	ENSCSAT00000017168	4730	4982	5227	4920	5678	3536	2778	4001	4285	2340	2445	2063	2751
ENSCSAG00000001366	ENSCSAT00000017167	481	477	533	488	557	328	231	325	741	220	223	178	435
ENSCSAG00000001367	ENSCSAT00000017166	17	18	18	26	24	17	18	26	17	19	14	8	13
ENSCSAG00000001368	ENSCSAT00000017165	0	0	0	1	0	0	0	0	0	0	0	0	0
ENSCSAG00000001369	ENSCSAT00000017164	816	777	814	781	678	1116	896	1305	1058	1606	1776	1471	1624
ENSCSAG00000001370	ENSCSAT00000017163	2	3	3	1	3	1	0	1	0	1	0	1	0
ENSCSAG00000001371	ENSCSAT00000017162	580	588	566	553	597	343	291	407	282	104	126	106	86
ENSCSAG00000001372	ENSCSAT00000017161	0	0	1	0	0	0	0	0	0	0	0	0	0
ENSCSAG00000001373	ENSCSAT00000017160	367	352	380	346	243	499	347	553	190	149	143	120	100
ENSCSAG00000001374	ENSCSAT00000017159	529	551	563	517	450	298	303	337	295	371	429	334	350
ENSCSAG00000001375	ENSCSAT00000017158	3390	3467	3517	3445	2888	4243	2255	3655	4206	2070	2029	1905	2441
ENSCSAG00000001376	ENSCSAT00000017157	1303	1310	1415	1266	1176	1609	1126	1761	1654	1663	1683	1517	2047
ENSCSAG00000001377	ENSCSAT00000017156	1904	1907	2027	1908	1241	846	698	1011	1625	2687	2992	2603	2669
ENSCSAG00000001378	ENSCSAT00000017155	18	12	13	18	10	19	11	20	20	52	48	38	56
ENSCSAG00000001379	ENSCSAT00000017154	488.77	512.8	513.93	501.89	622.88	665.88	426.9	707.93	536.91	466.92	438.85	400.97	409.98
ENSCSAG00000001380	ENSCSAT00000017153	13	15	11	10	29	62	47	73	54	37	28	22	25
ENSCSAG00000001381	ENSCSAT00000017152	134	157	146	153	107	190	165	208	282	114	134	117	222
ENSCSAG00000001382	ENSCSAT00000017151	401	414	395	374	393	351	318	434	379	370	385	325	461
ENSCSAG00000001383	ENSCSAT00000017150	1	0	0	0	0	1	0	0	0	1	0	0	0
ENSCSAG00000001384	ENSCSAT00000017149	0	0	1	0	0	0	0	0	1	0	1	0	2
ENSCSAG00000001385	ENSCSAT00000017148	21	12	20	16	16	45	20	42	16	21	30	27	15
ENSCSAG00000001386	ENSCSAT00000017147	2128	2122	2198	2112	2347	1585	1305	1812	2343	1554	1704	1475	2768
ENSCSAG00000001387	ENSCSAT00000017146	295	292	307	287	247	308	174	294	364	222	254	216	407
ENSCSAG00000001388	ENSCSAT00000017145	0	1	0	0	0	0	0	0	0	0	0	0	0
ENSCSAG00000001389	ENSCSAT00000017144	9	8	8	6	9	5	11	13	1	92	119	90	87
ENSCSAG00000001390	ENSCSAT00000017143	2220	2223	2210	2391	2575	1258	1012	1290	1865	3537	3846	3276	5632
ENSCSAG00000001391	ENSCSAT00000017142	657	711	696	683	899	571	387	566	834	484	466	435	730
ENSCSAG00000001392	ENSCSAT00000017141	0	0	0	0	0	0	0	0	0	0	0	1	0
ENSCSAG00000001393	ENSCSAT00000017140	0	0	0	0	0	0	0	0	0	0	0	0	0
ENSCSAG00000001394	ENSCSAT00000017139	0	0	2	1	0	1	0	0	0	0	0	0	0
ENSCSAG00000001395	ENSCSAT00000017138	2	0	1	0	0	0	0	0	0	0	0	0	0
ENSCSAG00000001396	ENSCSAT00000017137	1082	1185	1235	1127	1102	1191	1022	1487	1600	1411	1500	1284	1681
ENSCSAG00000001397	ENSCSAT00000017136	41	45	52	36	31	59	46	66	65	29	31	27	33
ENSCSAG00000001398	ENSCSAT00000017135	604	558	605	551	628	522	438	608	349	652	611	581	595
ENSCSAG00000001399	ENSCSAT00000017134	1297	1364	1327	1252	1141	1053	785	1220	944	1104	1082	938	1033
ENSCSAG00000001400	ENSCSAT00000017133	336	364	359	377	356	399	276	347	401	533	532	460	528
ENSCSAG00000001401	ENSCSAT00000017132	131	131	152	158	187	53	46	66	110	457	477	374	786
ENSCSAG00000001402	ENSCSAT00000017131	2054	2014	2010	2044	2308	2078	1620	2406	1656	1556	1540	1354	1367
ENSCSAG00000001403	ENSCSAT00000017130	560	594	627	612	574	597	385	606	911	655	688	630	902
ENSCSAG00000001404	ENSCSAT00000017129	0	0	0	0	0	0	0	0	0	0	0	0	0
ENSCSAG00000001405	ENSCSAT00000017128	0	0	0	0	1	0	0	0	0	24	16	12	29
ENSCSAG00000001406	ENSCSAT00000017127	103	97	105	95	152	424	349	520	430	1147	1168	1024	1051
ENSCSAG00000001407	ENSCSAT00000017126	59	69	55	62	76	180	91	139	167	67	60	60	67
ENSCSAG00000001408	ENSCSAT00000017125	17	17	8	9	12	61	40	62	70	9	18	13	21
ENSCSAG00000001409	ENSCSAT00000017124	18	28	24	22	31	20	16	28	31	104	117	107	117
ENSCSAG00000001410	ENSCSAT00000017123	2521	2407	2543	2320	2033	3403	3056	4406	1170	3913	4102	3586	1973
ENSCSAG00000001411	ENSCSAT00000017122	457	425	474	419	429	291	200	320	114	323	325	270	186
ENSCSAG00000001412	ENSCSAT00000017121	0	0	0	0	0	0	0	0	0	0	0	0	0
ENSCSAG00000001413	ENSCSAT00000017120	1160	1106	1110	1112	1034	1067	931	1297	1311	1042	1159	943	1449
ENSCSAG00000001414	ENSCSAT00000017119	23	27	23	15	14	13	5	13	22	1	3	2	8
ENSCSAG00000001415	ENSCSAT00000017118	1	2	1	0	1	1	0	1	0	3	2	1	7
ENSCSAG00000001416	ENSCSAT00000017117	2	0	1	0	0	0	1	0	0	0	0	0	1
ENSCSAG00000001417	ENSCSAT00000017116	253.99	273.5	251.31	291.19	263.85	172.67	154.91	230.32	237.2	154.16	216.84	151.79	241.3
ENSCSAG00000001418	ENSCSAT00000017115	29.61	35	53.3	36.21	23	50.77	42.9	45.77	48.64	15	14	10	15.27
ENSCSAG00000001419	ENSCSAT00000017114	102.39	109	108.7	119.79	77	72.23	47.1	65.23	92.36	53	62	45	86.73
ENSCSAG00000001420	ENSCSAT00000017113	537	516	547	552	507	385	292	434	263	430	417	351	378
ENSCSAG00000001421	ENSCSAT00000017112	12	16	18	11	13	3	6	6	12	7	12	9	14
ENSCSAG00000001422	ENSCSAT00000017111	3	5	9	4	2	0	0	0	0	0	0	1	0
ENSCSAG00000001423	ENSCSAT00000017110	8	6	3	2	3	2	5	2	3	1	0	0	1
ENSCSAG00000001424	ENSCSAT00000017109	6	7	5	2	8	16	9	11	16	7	10	7	16
ENSCSAG00000001425	ENSCSAT00000017108	241	244	278	260	314	192	164	215	137	58	63	52	48
ENSCSAG00000001426	ENSCSAT00000017107	42	56	48	54	46	38	31	44	55	38	30	37	63
ENSCSAG00000001427	ENSCSAT00000017106	468	495	484	436	522	404	294	456	603	362	419	361	522
ENSCSAG00000001428	ENSCSAT00000017105	887	871	1018	868	1051	376	295	460	472	1085	1200	1044	1772
ENSCSAG00000001429	ENSCSAT00000017104	5231	5024	5507	5084	6904	1180	746	1190	1579	781	795	708	874
ENSCSAG00000001430	ENSCSAT00000017103	541	536	560	572	623	383	249	377	416	421	400	357	464
ENSCSAG00000001431	ENSCSAT00000017102	1	4	0	1	0	5	3	6	3	70	58	81	76
ENSCSAG00000001432	ENSCSAT00000017101	144	156	145	156	159	160	113	147	196	184	172	162	228
ENSCSAG00000001433	ENSCSAT00000017100	0	0	0	0	0	0	0	2	0	2	0	0	0
ENSCSAG00000001434	ENSCSAT00000017099	0	0	0	0	0	0	0	0	1	0	0	0	0
ENSCSAG00000001435	ENSCSAT00000017098	0	0	0	0	0	0	0	0	0	0	0	0	0
ENSCSAG00000001436	ENSCSAT00000017097	0	0	0	0	0	0	0	0	0	21	17	14	23
ENSCSAG00000001437	ENSCSAT00000017096	4	2	6	5	1	7	1	5	3	0	0	0	0
ENSCSAG00000001438	ENSCSAT00000017095	12	12	11	7	2	14	11	11	3	0	0	1	0
ENSCSAG00000001439	ENSCSAT00000017094	414	374	418	335	409	493	438	576	527	615	668	512	718
ENSCSAG00000001440	ENSCSAT00000017093	1941	2007	2070	2025	2040	1766	1462	1917	2770	1872	2019	1737	3590
ENSCSAG00000001441	ENSCSAT00000017092	253	239	231	239	203	231	182	253	160	169	182	165	201
ENSCSAG00000001442	ENSCSAT00000017091	1379	1244	1359	1264	1303	1841	1340	1876	2240	2108	2249	1979	2975
ENSCSAG00000001443	ENSCSAT00000017090	1	3	4	7.01	6	1	5	5	8	6	8.01	5.01	3
ENSCSAG00000001444	ENSCSAT00000017089	1028	1104	1049	1063	965	784	636	897	340	763	870	704	499
ENSCSAG00000001445	ENSCSAT00000017088	603	601	606	591	681	528	388	549	826	640	694	569	974
ENSCSAG00000001446	ENSCSAT00000017087	675	757	739	746	762	577	489	612	812	749	795	706	1006
ENSCSAG00000001447	ENSCSAT00000017086	0	2	0	0	0	4.31	10.64	11.53	3	1	6.26	4.19	1.12
ENSCSAG00000001448	ENSCSAT00000017085	4	1	2	0	3	16.69	10.36	17.47	16	33	31.74	30.81	30.88
ENSCSAG00000001449	ENSCSAT00000017084	102	88	87	88	139	185	158	231	229	241	234	206	265
ENSCSAG00000001450	ENSCSAT00000017083	0	0	0	0	0	0	0	0	0	0	0	0	0
ENSCSAG00000001451	ENSCSAT00000017082	0	0	0	0	1	4	4	10	2	9	3	6	7
ENSCSAG00000001452	ENSCSAT00000017081	0	0	0	0	0	0	0	0	0	0	1	0	0
ENSCSAG00000001453	ENSCSAT00000017080	166	169	169	142	168	59	52	89	40	19	25	21	19
ENSCSAG00000001454	ENSCSAT00000017079	0	0	0	0	0	0	0	0	0	0	0	0	0
ENSCSAG00000001455	ENSCSAT00000017078	834	887	843	794	730	688	573	731	599	164	197	166	135
ENSCSAG00000001456	ENSCSAT00000017077	621	621	619	555	575	532	412	598	636	452	436	358	468
ENSCSAG00000001457	ENSCSAT00000017076	2	1	2	2	5	1	0	1	1	0	0	0	0
ENSCSAG00000001458	ENSCSAT00000017075	880	867	946	903	915	820	587	946	716	884	926	752	773
ENSCSAG00000001459	ENSCSAT00000017074	131	122	156	99	64	270	134	248	132	113	104	129	105
ENSCSAG00000001460	ENSCSAT00000017073	363	341	390	344	299	254	189	316	175	123	127	141	94
ENSCSAG00000001461	ENSCSAT00000017072	100	101	98	106	94	153	122	196	158	197	220	189	273
ENSCSAG00000001462	ENSCSAT00000017071	0	0	0	0	0	0	0	0	0	0	0	0	0
ENSCSAG00000001463	ENSCSAT00000017070	21	29	14	18	10	18	15	19	12	2	1	1	0
ENSCSAG00000001464	ENSCSAT00000017069	18	21	16	15	15	4	11	9	3	9	12	12	9
ENSCSAG00000001465	ENSCSAT00000017068	94	83	109	91	70	66	55	71	50	87	73	68	57
ENSCSAG00000001466	ENSCSAT00000017067	0	0	0	0	0	0	0	0	0	0	0	0	0
ENSCSAG00000001467	ENSCSAT00000017066	355	336	350	323	366	293	203	321	388	232	269	195	320
ENSCSAG00000001468	ENSCSAT00000017065	158	144	159	174	146	176	135	171	153	147	201	139	188
ENSCSAG00000001469	ENSCSAT00000017064	10	2	6	12	1	3	1	2	2	5	4	1	1
ENSCSAG00000001470	ENSCSAT00000017063	217	191	212	175	169	189	143	205	61	151	162	120	127
ENSCSAG00000001471	ENSCSAT00000017062	9868.33	9792.19	10317.6	9900.56	9602.12	7496.87	5133.5	7330.95	12909.2	5436.27	5884.5	4939.66	11167.7
ENSCSAG00000001472	ENSCSAT00000017061	119.45	125.21	106.6	138.31	78.36	13.09	15.19	22.34	17.08	34.45	26.57	21.58	30.38
ENSCSAG00000001473	ENSCSAT00000017060	0	0	0	0	0	0	0	0	0	0	0	0	0
ENSCSAG00000001474	ENSCSAT00000017059	492	499	519	529	520	338	260	370	318	337	346	297	323
ENSCSAG00000001475	ENSCSAT00000017058	178	184	181	190	226	188	162	245	160	231	263	214	258
ENSCSAG00000001476	ENSCSAT00000017057	423	411	442	438	518	327	192	326	290	103	121	93	92
ENSCSAG00000001477	ENSCSAT00000017056	1223	1196	1195	1209	1253	1061	838	1138	1372	808	862	723	1140
ENSCSAG00000001478	ENSCSAT00000017055	852	915	909	887	864	987	738	1063	920	770	816	700	870
ENSCSAG00000001479	ENSCSAT00000017054	365	347	394	325	350	270	182	331	346	369	394	333	404
ENSCSAG00000001480	ENSCSAT00000017053	1517	1567	1676	1500	2119	1257	894	1401	1623	967	1013	819	1046
ENSCSAG00000001481	ENSCSAT00000017052	771	821	783	712	677	445	346	511	624	530	670	563	699
ENSCSAG00000001482	ENSCSAT00000017051	3	2	3	3	2	8	1	10	3	1	1	1	1
ENSCSAG00000001483	ENSCSAT00000017050	17280	17186	17596	16392	14598	14297	10772	15860	10620	3593	3742	3352	3115
ENSCSAG00000001484	ENSCSAT00000017049	1227	1197	1210	1208	1270	742	623	926	905	783	855	666	798
ENSCSAG00000001485	ENSCSAT00000017048	381	380	383	370	1927	488	353	544	596	1403	1492	1212	1086
ENSCSAG00000001486	ENSCSAT00000017047	141	137	134	125	116	129	142	139	204	228	182	178	340
ENSCSAG00000001487	ENSCSAT00000017046	5620	5553	5853	5363	6156	3263	2665	3788	4225	1667	1871	1493	1726
ENSCSAG00000001488	ENSCSAT00000017045	48	43	54	42	61	45	33	46	73	40	34	28	67
ENSCSAG00000001489	ENSCSAT00000017044	0	0	0	0	0	0	1	0	0	0	0	1	0
ENSCSAG00000001490	ENSCSAT00000017043	34	30	28	37	31	24	12	18	23	32	22	25	42
ENSCSAG00000001491	ENSCSAT00000017042	127	128	95	119	114	127	104	145	196	123	128	123	191
ENSCSAG00000001492	ENSCSAT00000017041	0	0	0	0	0	0	0	0	0	0	0	0	0
ENSCSAG00000001493	ENSCSAT00000017040	0	0	0	0	0	0	0	0	0	0	0	0	0
ENSCSAG00000001494	ENSCSAT00000017039	242	216	238	210	186	238	137	258	218	303	274	237	357
ENSCSAG00000001495	ENSCSAT00000017038	2111	2150	2204	2024	1884	3259	2955	4141	3089	572	610	532	525
ENSCSAG00000001496	ENSCSAT00000017037	607	564	621	627	591	486	375	569	791	542	546	458	901
ENSCSAG00000001497	ENSCSAT00000017036	714	712	712	686	585	1250	831	1318	1386	1658	1701	1426	2378
ENSCSAG00000001498	ENSCSAT00000017035	261	296	284	249	187	164	101	150	133	51	59	37	46
ENSCSAG00000001499	ENSCSAT00000017034	9	8	17	7	8	10	12	14	21	0	0	0	0
ENSCSAG00000001500	ENSCSAT00000017033	0	0	0	0	0	0	0	0	0	0	0	0	0
ENSCSAG00000001501	ENSCSAT00000017032	127	113	115	98	80	83	79	110	76	76	83	77	83
ENSCSAG00000001502	ENSCSAT00000017031	1144	1198	1139	1084	1054	675	517	810	584	678	659	619	624
ENSCSAG00000001503	ENSCSAT00000017030	193	210	179	180	199	144	108	161	125	213	231	207	310
ENSCSAG00000001504	ENSCSAT00000017029	333.7	321.3	305.1	328.77	359.98	350.4	273.48	417.68	408.87	384.75	388.3	316.59	525.62
ENSCSAG00000001505	ENSCSAT00000017028	1165.3	1136.7	1231.9	1079.23	1408.02	1064.6	845.52	1122.32	1500.13	853.25	950.7	860.41	1279.38
ENSCSAG00000001506	ENSCSAT00000017027	109	108	106	83	114	186	120	166	150	112	111	84	149
ENSCSAG00000001507	ENSCSAT00000017026	23	21	22	19	25	39	14	23	22	18	13	20	24
ENSCSAG00000001508	ENSCSAT00000017025	193	207	195	191	184	161	102	184	127	164	201	167	222
ENSCSAG00000001509	ENSCSAT00000017024	776	753	819	801	1077	700	497	783	1157	972	1032	860	1665
ENSCSAG00000001510	ENSCSAT00000017023	264	268	271	250	233	431	352	480	499	311	311	324	422
ENSCSAG00000001511	ENSCSAT00000017022	81	79	69	55	20	2154	1580	2285	2107	19848	21501	17987	16418
ENSCSAG00000001512	ENSCSAT00000017021	159	193	198	187	141	161	105	187	172	136	94	126	118
ENSCSAG00000001513	ENSCSAT00000017020	141	138	129	148	129	96	74	114	60	152	149	142	89
ENSCSAG00000001514	ENSCSAT00000017019	1.03	0	0	0	0	0	0	0	0	0	0	1	0
ENSCSAG00000001515	ENSCSAT00000017018	173.97	180	162	202	209	160	121	153	184	105	112	107	161
ENSCSAG00000001516	ENSCSAT00000017017	0	0	0	0	0	1	1	0	0	11	16	18	23
ENSCSAG00000001517	ENSCSAT00000017016	3028	2929	3070	3072	2240	890	626	890	605	211	221	210	164
ENSCSAG00000001518	ENSCSAT00000017015	1	0	1	0	0	0	0	0	1	0	0	0	0
ENSCSAG00000001519	ENSCSAT00000017014	170	170	178	166	127	260	125	261	166	110	99	87	85
ENSCSAG00000001520	ENSCSAT00000017013	7.42	8.57	13	13.05	8	48.06	22.63	41	36.93	11	15.66	8.27	10.29
ENSCSAG00000001521	ENSCSAT00000017012	10.58	6.43	9	11.95	4	45.94	19.37	29	43.07	14	8.34	22.73	25.71
ENSCSAG00000001522	ENSCSAT00000017011	0	0	0	4.1	3.67	0	1.21	0	1.18	5.27	1.27	0	5.05
ENSCSAG00000001523	ENSCSAT00000017010	0	0	0	0	0	0	0	0	0	1	1	0	0
ENSCSAG00000001524	ENSCSAT00000017009	516	543	526	517	448	821	605	924	970	1562	1671	1397	2166
ENSCSAG00000001525	ENSCSAT00000017008	1137	1181	1177	1107	1219	1045	747	1134	1533	864	917	732	1209
ENSCSAG00000001526	ENSCSAT00000017007	0	0	0	0	0	0	0	0	0	0	0	0	0
ENSCSAG00000001527	ENSCSAT00000017006	0	0	0	0	0	0	0	0	0	0	0	0	0
ENSCSAG00000001528	ENSCSAT00000017005	0	0	0	0	0	0	0	0	0	0	0	0	0
ENSCSAG00000001529	ENSCSAT00000017004	411	429	446	416	382	581	462	653	573	320	393	318	408
ENSCSAG00000001530	ENSCSAT00000017003	2	0	0	4	1	2	0	1	3	3	2	1	2
ENSCSAG00000001531	ENSCSAT00000017002	1826	1698	1840	1857	1672	1781	1037	1623	2060	937	831	800	1001
ENSCSAG00000001532	ENSCSAT00000017001	0	2	0	0	0	1	3	0	0	0	0	1	1
ENSCSAG00000001533	ENSCSAT00000017000	949	913	975	959	813	864	644	982	1270	1140	1271	1010	1704
ENSCSAG00000001534	ENSCSAT00000016999	0	0	0	0	0	0	0	0	0	0	0	0	1
ENSCSAG00000001535	ENSCSAT00000016998	360	344	375	354	276	220	157	242	200	237	265	207	230
ENSCSAG00000001536	ENSCSAT00000016997	684	646	720	678	715	741	603	750	598	682	778	654	670
ENSCSAG00000001537	ENSCSAT00000016996	252	274	265	271	295	260	178	306	173	205	199	193	223
ENSCSAG00000001538	ENSCSAT00000016995	744	756	787	772	963	532	477	624	1155	681	753	619	1128
ENSCSAG00000001539	ENSCSAT00000016994	10	5	7	3	7	6	8	8	8	12	5	8	9
ENSCSAG00000001540	ENSCSAT00000016993	3	0	1	1	1	2	3	4	7	2	2	1	3
ENSCSAG00000001541	ENSCSAT00000016992	4	7	7	7	7	8	6	9	10	2	5	5	7
ENSCSAG00000001542	ENSCSAT00000016991	1801	1744	1858	1700	1429	2509	1912	2844	1294	1933	2108	1712	1687
ENSCSAG00000001543	ENSCSAT00000016990	85	57	64	53	69	54	30	51	46	13	22	21	23
ENSCSAG00000001544	ENSCSAT00000016989	3	7	9	9	4	4	1	0	0	8	4	6	8
ENSCSAG00000001545	ENSCSAT00000016988	1563	1512	1593	1591	1300	1176	1025	1380	1063	1277	1330	1117	1292
ENSCSAG00000001546	ENSCSAT00000016987	1572	1495	1647	1658	1789	1451	1094	1407	2391	1226	1183	1113	2058
ENSCSAG00000001547	ENSCSAT00000016986	3	2	3	4	0	0	1	2	0	0	1	1	0
ENSCSAG00000001548	ENSCSAT00000016984,ENSCSAT00000016985	48	43	65	49	57	69	53	72	73	27	36	24	43
ENSCSAG00000001549	ENSCSAT00000016983	2	1	3	5	2	4	1	1	1	1	6	7	1
ENSCSAG00000001550	ENSCSAT00000016982	890	931	975	933	972	643	552	735	675	799	823	709	774
ENSCSAG00000001551	ENSCSAT00000016981	2	2	3	5	4	1	5	3	2	1	0	2	4
ENSCSAG00000001552	ENSCSAT00000016980	639	623	695	633	760	691	550	737	734	660	604	560	655
ENSCSAG00000001553	ENSCSAT00000016978,ENSCSAT00000016979	67	78	79	69	75	79	62	87	90	93	93	85	159
ENSCSAG00000001554	ENSCSAT00000016977	285	318	313	277	289	304	222	356	512	358	434	313	622
ENSCSAG00000001555	ENSCSAT00000016976	3	5	2	3	1	4	0	1	2	2	0	0	0
ENSCSAG00000001556	ENSCSAT00000016975	0	0	0	0	0	0	0	0	0	0	0	0	0
ENSCSAG00000001557	ENSCSAT00000016974	230	185	196	199	208	312	265	378	210	194	198	171	105
ENSCSAG00000001558	ENSCSAT00000016973	2543	2349	2569	2377	2235	2082	1572	2215	1919	1908	2060	1644	1968
ENSCSAG00000001559	ENSCSAT00000016972	414	402	420	383	409	402	297	428	394	331	349	342	406
ENSCSAG00000001560	ENSCSAT00000016971	0	0	0	0	0	0	0	0	0	0	0	0	0
ENSCSAG00000001561	ENSCSAT00000016970	344	329	399	371	388	534	412	631	373	518	494	428	360
ENSCSAG00000001562	ENSCSAT00000016969	1	8	5	5	0	8	4	6	5	22	32	20	35
ENSCSAG00000001563	ENSCSAT00000016968	110	117	109	124	138	120	91	128	45	110	87	107	66
ENSCSAG00000001564	ENSCSAT00000016967	0	0	1	1	3	2	3	1	3	196	218	174	256
ENSCSAG00000001565	ENSCSAT00000016966	224	230	230	259	270	181	150	201	356	404	402	315	853
ENSCSAG00000001566	ENSCSAT00000016965	0	0	0	0	0	0	0	0	0	0	0	0	0
ENSCSAG00000001567	ENSCSAT00000016964	1	1	1	0	0	0	1	1	0	6	7	3	4
ENSCSAG00000001568	ENSCSAT00000016963	284	306	264	261	302	352	281	410	436	398	430	361	508
ENSCSAG00000001569	ENSCSAT00000016962	259	273	275	289	221	159	122	187	212	370	436	385	586
ENSCSAG00000001570	ENSCSAT00000016961	291	265	260	250	250	180	144	247	211	284	273	240	263
ENSCSAG00000001571	ENSCSAT00000016960	0	1	0	0	0	0	0	1	0	2	4	2	6
ENSCSAG00000001572	ENSCSAT00000016959	1	1	0	0	1	2	0	0	1	109	106	98	34
ENSCSAG00000001573	ENSCSAT00000016958	0	0	0	0	0	0	0	0	0	1	1	1	0
ENSCSAG00000001574	ENSCSAT00000016957	24	21	26	24	25	67	34	55	119	39	47	49	84
ENSCSAG00000001575	ENSCSAT00000016956	3	2	5	2	1	0	0	2	0	8	8	7	29
ENSCSAG00000001576	ENSCSAT00000016955	596	589	635	580	786	520	416	495	840	439	463	352	632
ENSCSAG00000001577	ENSCSAT00000016954	2024	2091.94	2275.88	2048.94	2429.88	1516	1207.94	1642	2772.93	1200.96	1248	1059	1911.94
ENSCSAG00000001578	ENSCSAT00000016953	0	1	0	0	0	0	0	0	0	0	0	0	0
ENSCSAG00000001579	ENSCSAT00000016952	0	1	0	2	1	0	1	0	1	2	2	2	7
ENSCSAG00000001580	ENSCSAT00000016951	685	675	731	741	744	630	561	698	1049	491	501	454	820
ENSCSAG00000001581	ENSCSAT00000016950	4	8	7	8	4	7	1	8	7	6	8	6	10
ENSCSAG00000001582	ENSCSAT00000016949	521	550	508	512	553	386	295	440	421	243	287	279	289
ENSCSAG00000001583	ENSCSAT00000016948	0	0	0	0	0	1	1	3	0	7	10	15	1
ENSCSAG00000001584	ENSCSAT00000016947	43	31	43	44	29	82	40	84	55	27	27	25	36
ENSCSAG00000001585	ENSCSAT00000016946	414	404	466	464	517	434	297	404	653	517	530	441	742
ENSCSAG00000001586	ENSCSAT00000016944	889	925	929	851	780	808	634	938	530	934	1018	843	748
ENSCSAG00000001587	ENSCSAT00000016943	169	162	159	157	147	39	59	64	24	12	13	13	15
ENSCSAG00000001588	ENSCSAT00000016945	884	977	1059	956	1019	900	746	922	1750	1039	1128	1005	1782
ENSCSAG00000001589	ENSCSAT00000016942	360	350	350	340	336	373	261	364	336	366	389	338	405
ENSCSAG00000001590	ENSCSAT00000016940	5273	5188	5633	5375	6286	4416	3585	5019	6271	2300	2581	2107	2645
ENSCSAG00000001591	ENSCSAT00000016939	67	74	81	74	78	99	79	122	110	73	64	58	83
ENSCSAG00000001592	ENSCSAT00000016938	35	43	39	40	51	53	29	29	59	17	8	18	26
ENSCSAG00000001593	ENSCSAT00000016937	87	91	115	105	80	137	93	145	170	85	74	75	112
ENSCSAG00000001594	ENSCSAT00000016941	525	501	532	557	530	537	469	632	527	454	520	462	518
ENSCSAG00000001595	ENSCSAT00000016936	89	84	104	88	88	186	120	178	162	96	73	89	86
ENSCSAG00000001596	ENSCSAT00000016935	40	32	34	31	27	39	20	40	34	20	16	11	16
ENSCSAG00000001597	ENSCSAT00000016934	222	212	204	189	241	263	173	256	222	191	188	171	211
ENSCSAG00000001598	ENSCSAT00000016933	5221	5036	5461	5229	5244	4285	3331	4281	8700	2656	2777	2402	4793
ENSCSAG00000001599	ENSCSAT00000016931	0	1	0	1	0	0	0	0	0	0	0	0	0
ENSCSAG00000001600	ENSCSAT00000016932	1279	1321	1484	1341	1196	1553	1009	1495	1156	1177	1120	1061	1047
ENSCSAG00000001601	ENSCSAT00000016930	111	121	131	98	114	145	123	170	151	83	83	95	81
ENSCSAG00000001602	ENSCSAT00000016928	1265	1230	1280	1215	1459	1338	1123	1485	2010	1538	1613	1292	2414
ENSCSAG00000001603	ENSCSAT00000016929	99	82	87	71	58	80	69	100	49	63	53	52	36
ENSCSAG00000001604	ENSCSAT00000016926	3	2	1	2	3	1	2	2	2	0	0	0	0
ENSCSAG00000001605	ENSCSAT00000016925	23	9	18	18	21	24	19	15	14	25	18	5	18
ENSCSAG00000001606	ENSCSAT00000016924	14.14	10.98	8.87	14.19	17.46	16.01	13.12	22.5	7.33	17.93	13.61	16.31	15.31
ENSCSAG00000001607	ENSCSAT00000016927	48	50	40	43	30	39	25	27	52	9	16	15	20
ENSCSAG00000001608	ENSCSAT00000016923	174.86	156.02	136.13	140.81	133.54	253.99	167.88	211.5	193.67	189.07	186.39	188.69	263.69
ENSCSAG00000001609	ENSCSAT00000016922	0	0	0	0	0	0	0	0	0	0	0	0	0
ENSCSAG00000001610	ENSCSAT00000016921	0	0	0	0	0	0	0	2	0	0	0	0	0
ENSCSAG00000001611	ENSCSAT00000016920	737.09	705.83	752.57	661.8	726.73	427.97	331.34	501.36	370.58	272.3	281.91	259.82	251.19
ENSCSAG00000001612	ENSCSAT00000016919	0	0	0	0	0	1	2	0	1	0	0	1	0
ENSCSAG00000001613	ENSCSAT00000016917	73	87	77	83	57	140	121	177	211	126	155	134	184
ENSCSAG00000001614	ENSCSAT00000016916	0	0	0	0	0	0	0	0	0	0	0	1	0
ENSCSAG00000001615	ENSCSAT00000016915	0	0	1	0	0	1	0	0	0	0	0	0	1
ENSCSAG00000001616	ENSCSAT00000016914	47	59	57	66	59	80	58	73	47	44	31	45	56
ENSCSAG00000001617	ENSCSAT00000016918	206	196	197	202	120	189	118	204	86	165	129	127	110
ENSCSAG00000001618	ENSCSAT00000016913	3	2	2	2	0	5	3	3	1	5	5	6	3
ENSCSAG00000001619	ENSCSAT00000016912	14	23	18	16	15	21	29	34	31	33	33	39	51
ENSCSAG00000001620	ENSCSAT00000016911	59	40	54	58	35	90	61	69	75	59	67	48	60
ENSCSAG00000001621	ENSCSAT00000016910	3	6	3	2	3	4	7	7	2	3	6	7	2
ENSCSAG00000001622	ENSCSAT00000016908	86	80	116	90	98	107	63	96	76	61	61	49	50
ENSCSAG00000001623	ENSCSAT00000016907	0	0	1	0	0	3	0	0	0	1	0	0	0
ENSCSAG00000001624	ENSCSAT00000016906	121	104	120	127	106	131	84	140	148	83	68	87	78
ENSCSAG00000001625	ENSCSAT00000016905	197	188	177	201	191	279	203	281	192	218	239	211	239
ENSCSAG00000001626	ENSCSAT00000016904	28	28	20	30	27	23	21	26	12	10	18	17	11
ENSCSAG00000001627	ENSCSAT00000016903	83	88	94	92	70	75	49	68	60	43	44	35	67
ENSCSAG00000001628	ENSCSAT00000016902	39	50	55	51	48	79	44	70	86	33	33	23	40
ENSCSAG00000001629	ENSCSAT00000016901	6	2	5	11	7	10	6	7	4	17	10	12	8
ENSCSAG00000001630	ENSCSAT00000016909	445	439	477	444	404	342	224	349	258	358	353	315	309
ENSCSAG00000001631	ENSCSAT00000016900	144	145	149	137	91	195	108	175	153	167	159	139	168
ENSCSAG00000001632	ENSCSAT00000016899	0	0	0	1	0	0	0	0	0	1	0	0	0
ENSCSAG00000001633	ENSCSAT00000016898	22	35	38	38	30	17.73	35	49	70	60	52	76	86
ENSCSAG00000001634	ENSCSAT00000016897	2	4	4	1	2	7	0	6	7	5	5	8	4
ENSCSAG00000001635	ENSCSAT00000016895	387	382	339	369	297	408	337	458	414	327	358	288	357
ENSCSAG00000001636	ENSCSAT00000016894	1	0	1	1	1	2	0	4	2	2	2	1	0
ENSCSAG00000001637	ENSCSAT00000016893	1	0	1	0	0	0	0	0	2	1	6	5	4
ENSCSAG00000001638	ENSCSAT00000016896	71	76	63	75	65	100	66	120	88	103	98	86	108
ENSCSAG00000001639	ENSCSAT00000016892	188	169	174	155	172	303	180	289	279	189	212	185	274
ENSCSAG00000001640	ENSCSAT00000016891	21	13	18	11	15	54	33	55	44	34	33	35	45
ENSCSAG00000001641	ENSCSAT00000016889	41	36	43	29	40	57	40	56	55	55	45	35	64
ENSCSAG00000001642	ENSCSAT00000016890	246	230	255	260	261	187	157	203	303	156	177	134	198
ENSCSAG00000001643	ENSCSAT00000016888	197	174	190	168	144	207	171	249	204	175	182	170	169
ENSCSAG00000001644	ENSCSAT00000016886	13	16	20.36	23	16.24	24	15	18	22.33	26.44	27.53	21	33
ENSCSAG00000001645	ENSCSAT00000016887	2019	2034	2091	2055	1991	2175	1744	2508	1615	1680	1729	1609	1409
ENSCSAG00000001646	ENSCSAT00000016885	25	27	27	20	19	13	14	17	16	13	14	17	11
ENSCSAG00000001647	ENSCSAT00000016884	111	104	135	106	103	341	265	336	361	1152	1341	1129	1110
ENSCSAG00000001648	ENSCSAT00000016883	1	1	3	1	0	9	7	7	16	38	51	31	46
ENSCSAG00000001649	ENSCSAT00000016882	1192	1249	1235	1140	1136	1115	768	1199	878	955	944	818	837
ENSCSAG00000001650	ENSCSAT00000016881	3	6	5	3	4	5	1	4	0	1	3	6	0
ENSCSAG00000001651	ENSCSAT00000016880	1	4	2	1	2	3	1	0	3	4	1	1	0
ENSCSAG00000001652	ENSCSAT00000016879	942	831	936	894	1098	629	490	668	963	710	711	657	1105
ENSCSAG00000001653	ENSCSAT00000016878	74	80	78	91	58	47	52	76	29	96	95	70	61
ENSCSAG00000001654	ENSCSAT00000016876,ENSCSAT00000016877	53	62	61.64	47	64.76	58	47	70	55.67	64.56	44.47	44	37
ENSCSAG00000001655	ENSCSAT00000016874	0	0	0	0	0	0	0	0	0	0	0	0	0
ENSCSAG00000001656	ENSCSAT00000016873	354	370	351	374	417	357	313	392	312	410	385	334	477
ENSCSAG00000001657	ENSCSAT00000016875	0	0	0	0	0	0	0	0	0	0	0	0	0
ENSCSAG00000001658	ENSCSAT00000016872	9017	9132	9492	9210	10547	7648	6082	8679	8005	7999	8447	7039	8750
ENSCSAG00000001659	ENSCSAT00000016871	0	0	0	0	0	0	0	0	0	0	0	0	0
ENSCSAG00000001660	ENSCSAT00000016870	1005	1033	982	997	901	905	657	930	964	841	763	706	884
ENSCSAG00000001661	ENSCSAT00000016869	393	375	440	463	378	438	307	353	1088	381	376	344	1181
ENSCSAG00000001662	ENSCSAT00000016867	1	1	0	0	1	1	1	3	3	5	0	2	0
ENSCSAG00000001663	ENSCSAT00000016866	0	0	0	0	0	0	0	0	0	0	0	0	0
ENSCSAG00000001664	ENSCSAT00000016865	1	0	0	0	0	0	1	0	0	1	0	1	1
ENSCSAG00000001665	ENSCSAT00000016864	1	1	0	1	0	0	0	0	0	0	0	0	1
ENSCSAG00000001666	ENSCSAT00000016863	38	33	38	26	23	48	30	50	55	30	39	33	50
ENSCSAG00000001667	ENSCSAT00000016862	98	117	103	81	63	200	101	177	143	95	82	86	78
ENSCSAG00000001668	ENSCSAT00000016861	70	73	56	57	47	80	63	105	98	71	77	68	104
ENSCSAG00000001669	ENSCSAT00000016860	20	15	22	18	17	50	35	43	38	24	32	33	43
ENSCSAG00000001670	ENSCSAT00000016859	25	27	42	31	18	44	22	41	25	38	48	34	56
ENSCSAG00000001671	ENSCSAT00000016858	2	5	1	7	1	1	1	2	1	0	1	1	0
ENSCSAG00000001672	ENSCSAT00000016868	0	0	0	0	0	0	0	0	0	0	0	0	0
ENSCSAG00000001673	ENSCSAT00000016857	0	0	0	0	0	0	0	0	0	0	0	0	0
ENSCSAG00000001674	ENSCSAT00000016856	0	1	0	1	0	0	0	2	0	1	0	0	0
ENSCSAG00000001675	ENSCSAT00000016855	47	57	66	58	74	75	60	89	81	42	37	42	59
ENSCSAG00000001676	ENSCSAT00000016854	0	0	0	0	0	0	0	0	0	0	0	0	0
ENSCSAG00000001677	ENSCSAT00000016853	0	0	0	0	0	0	0	0	0	0	0	0	0
ENSCSAG00000001678	ENSCSAT00000016852	5	3	2	7	7	2	1	3	0	0	1	0	0
ENSCSAG00000001679	ENSCSAT00000016851	0	0	0	0	0	0	0	0	0	0	0	0	0
ENSCSAG00000001680	ENSCSAT00000016850	0	0	0	0	0	0	0	0	0	0	0	0	0
ENSCSAG00000001681	ENSCSAT00000016849	845	885	999	962	949	328	264	360	380	70	56	75	106
ENSCSAG00000001682	ENSCSAT00000016848	205	254	267	229	223	209	158	231	355	156	125	122	206
ENSCSAG00000001683	ENSCSAT00000016846	339	326	330	344	368	372	263	367	495	246	248	209	318
ENSCSAG00000001684	ENSCSAT00000016847	345	362	325	330	309	229	204	306	116	394	425	314	290
ENSCSAG00000001685	ENSCSAT00000016844	10	14	17	13	21	36	11	25	24	133	115	122	148
ENSCSAG00000001686	ENSCSAT00000016843	36	39	49	40	50	54	55	83	50	111	112	91	122
ENSCSAG00000001687	ENSCSAT00000016845	0	0	0	0	0	0	0	0	0	0	0	0	1
ENSCSAG00000001688	ENSCSAT00000016842	4	0	5	4	3	9	6	13	9	5	5	13	4
ENSCSAG00000001689	ENSCSAT00000016841	0	0	0	0	0	0	0	0	0	0	0	0	0
ENSCSAG00000001690	ENSCSAT00000016840	2.75	1.56	1.38	1.64	0	1.32	0	1.43	0	1.58	1.34	0	1.27
ENSCSAG00000001691	ENSCSAT00000016838	8325.25	8212.44	8717.62	8214.36	8099	6535.68	5297	7478.57	6166	13582.4	14456.7	12401	11009.7
ENSCSAG00000001692	ENSCSAT00000016837	0	0	0	0	0	2	0	2	0	0	0	1	0
ENSCSAG00000001693	ENSCSAT00000016839	0	0	0	0	0	0	0	0	0	0	0	0	0
ENSCSAG00000001694	ENSCSAT00000016836	194	207	207	204	209	178	140	177	240	271	252	231	347
ENSCSAG00000001695	ENSCSAT00000016835	426	479	564	522	326	341	317	437	293	893	925	762	677
ENSCSAG00000001696	ENSCSAT00000016834	0	0	0	0	0	0	0	0	0	1	0	1	0
ENSCSAG00000001697	ENSCSAT00000016833	1882	1995	2127	1870	1748	2946	2240	3188	2453	2529	2563	2237	2250
ENSCSAG00000001698	ENSCSAT00000016832	22	24	19	29	12	59	29	63	27	20	24	24	15
ENSCSAG00000001699	ENSCSAT00000016831	1121	1041	1159	968	1343	703	646	926	633	409	480	431	347
ENSCSAG00000001700	ENSCSAT00000016830	119	143	158	131	130	214	119	233	185	121	111	103	151
ENSCSAG00000001701	ENSCSAT00000016829	0	0	0	0	0	0	0	0	0	0	0	0	0
ENSCSAG00000001702	ENSCSAT00000016828	567	496	556	524	637	572	504	701	298	625	687	572	376
ENSCSAG00000001703	ENSCSAT00000016826	0	0	0	0	0	0	0	0	0	0	0	0	0
ENSCSAG00000001704	ENSCSAT00000016825	201	181	196	193	203	146	115	160	121	177	210	164	204
ENSCSAG00000001705	ENSCSAT00000016824	838	809	919	787	985	522	409	635	497	278	314	269	292
ENSCSAG00000001706	ENSCSAT00000016827	2	0	0	0	0	1	0	0	0	0	0	0	0
ENSCSAG00000001707	ENSCSAT00000016822	0	0	0	1	0	0	0	0	1	0	2	0	4
ENSCSAG00000001708	ENSCSAT00000016823	0	0	0	0	0	0	0	0	0	0	0	0	0
ENSCSAG00000001709	ENSCSAT00000016821	0	0	0	0	0	0	0	0	0	0	0	0	0
ENSCSAG00000001710	ENSCSAT00000016820	0	0	0	0	0	0	0	0	0	0	0	2	2
ENSCSAG00000001711	ENSCSAT00000016819	0	0	1	1	0	0	0	0	0	2	1	4	1
ENSCSAG00000001712	ENSCSAT00000016817	45	43	60	47	55	60	32	48	49	81	99	95	139
ENSCSAG00000001713	ENSCSAT00000016816	287	234	287	254	312	177	118	182	217	263	227	207	424
ENSCSAG00000001714	ENSCSAT00000016818	1	0	0	0	1	0	0	0	0	0	0	1	0
ENSCSAG00000001715	ENSCSAT00000016815	0	0	0	0	0	0	1	2	0	11	16	21	54
ENSCSAG00000001716	ENSCSAT00000016814	0	0	0	0	0	0	0	0	0	0	0	0	0
ENSCSAG00000001717	ENSCSAT00000016813	0	0	0	0	0	0	0	0	0	0	0	0	0
ENSCSAG00000001718	ENSCSAT00000016812	19	11	19	24	18	100	75	115	40	185	175	167	136
ENSCSAG00000001719	ENSCSAT00000016811	2441	2351	2543	2470	805	247	201	283	448	649	645	559	706
ENSCSAG00000001720	ENSCSAT00000016810	1754	1701	1794	1724	1763	2047	1570	2178	2573	1710	1826	1543	2376
ENSCSAG00000001721	ENSCSAT00000016809	0	0	0	0	0	0	0	0	0	0	1	0	1
ENSCSAG00000001722	ENSCSAT00000016808	2287	2219	2501	2321	2613	2245	1673	2309	2794	1378	1452	1282	1684
ENSCSAG00000001723	ENSCSAT00000016807	0	0	1	0	0	0	1	0	0	0	0	0	0
ENSCSAG00000001724	ENSCSAT00000016806	129	119	164	127	119	179	104	146	241	83	99	90	137
ENSCSAG00000001725	ENSCSAT00000016804	83	101	97	96	71	137	69	145	139	91	78	95	122
ENSCSAG00000001726	ENSCSAT00000016803	70	69	92	82	77	115	99	134	159	103	113	94	149
ENSCSAG00000001727	ENSCSAT00000016802	11	6	2	9	12	15	7	12	15	4	8	4	11
ENSCSAG00000001728	ENSCSAT00000016801	148	133	163	107	144	194	131	234	292	132	141	130	179
ENSCSAG00000001729	ENSCSAT00000016800	0	0	0	0	0	0	0	0	0	0	0	0	0
ENSCSAG00000001730	ENSCSAT00000016805	0	0	0	0	0	0	0	0	1	0	0	0	0
ENSCSAG00000001731	ENSCSAT00000016799	0	0	1	0	0	0	0	0	0	0	0	0	0
ENSCSAG00000001732	ENSCSAT00000016798	87	70	79	71	81	306	254	374	200	222	232	198	208
ENSCSAG00000001733	ENSCSAT00000016796	244	238	229	257	257	472	270	419	662	299	282	282	647
ENSCSAG00000001734	ENSCSAT00000016797	0	0	0	0	0	0	0	0	0	0	0	0	0
ENSCSAG00000001735	ENSCSAT00000016795	130	122	132	119	130	108	68	101	174	81	116	92	172
ENSCSAG00000001736	ENSCSAT00000016794	4317	4259	4585	4350	4924	2785	2064	2720	5217	1952	2166	1804	2366
ENSCSAG00000001737	ENSCSAT00000016793	0	0	0	0	1	0	1	1	0	0	0	0	0
ENSCSAG00000001738	ENSCSAT00000016792	5705.75	5638.35	6029.31	6050.45	5264.59	3249.48	2683.18	3480.26	6999.39	3396.67	3463.21	2997.06	5771.41
ENSCSAG00000001739	ENSCSAT00000016791	72	59	86	68	65	153	87	142	114	113	91	88	95
ENSCSAG00000001740	ENSCSAT00000016790	596	616	617	592	1308	623	437	679	669	533	555	496	476
ENSCSAG00000001741	ENSCSAT00000016789	5604	5676	5844	5484	4242	3826	3117	4460	2176	2394	2389	2122	1272
ENSCSAG00000001742	ENSCSAT00000016788	3	5	4	4	2	3	4	5	3	2	0	2	2
ENSCSAG00000001743	ENSCSAT00000016786	620	601	577	617	711	513	398	493	477	746	784	608	866
ENSCSAG00000001744	ENSCSAT00000016787	52	54	58	69	36	48	28	48	63	25	28	25	24
ENSCSAG00000001745	ENSCSAT00000016785	15.55	9.87	9.49	6.56	9.06	17.92	5.56	13.28	13.54	3.24	10.11	4.41	12.4
ENSCSAG00000001746	ENSCSAT00000016784	429	392	375	353	411	457	400	532	348	337	433	330	322
ENSCSAG00000001747	ENSCSAT00000016783	288.45	257.13	314.51	282.44	220.94	306.08	172.44	290.72	233.46	134.76	111.89	104.59	146.6
ENSCSAG00000001748	ENSCSAT00000016782	325	317	366	320	342	287	232	293	474	173	205	182	258
ENSCSAG00000001749	ENSCSAT00000016781	33	26	30	21	20	36	15	37	21	11	11	12	10
ENSCSAG00000001750	ENSCSAT00000016780	919	916	1039	959	1167	1425	1043	1572	1373	1252	1344	1190	1623
ENSCSAG00000001751	ENSCSAT00000016778	2	2	2	6	2	5	2	5	3	1	0	1	1
ENSCSAG00000001752	ENSCSAT00000016779	0	0	0	0	0	0	0	0	0	0	0	0	0
ENSCSAG00000001753	ENSCSAT00000016777	92	97	96	86	92	112	69	130	48	39	39	30	38
ENSCSAG00000001754	ENSCSAT00000016776	78	74	101	93	69	58	42	62	58	91	95	88	102
ENSCSAG00000001755	ENSCSAT00000016775	222.49	231.44	247.24	231.57	206.37	214.08	165.1	246.19	207.64	181.25	196.48	154.15	199.29
ENSCSAG00000001756	ENSCSAT00000016774	15	5	16	9	13	14	13	13	14	5	2	0	4
ENSCSAG00000001757	ENSCSAT00000016773	186.51	151.56	178.76	178.43	154.63	800.92	628.9	886.81	1244.36	8231.75	9111.52	7718.85	15789.7
ENSCSAG00000001758	ENSCSAT00000016772	4	6	8	4	6	11	2	7	12	5	3	2	7
ENSCSAG00000001759	ENSCSAT00000016771	158	146	156	151	120	235	106	246	208	128	124	112	200
ENSCSAG00000001760	ENSCSAT00000016770	130	121	147	152	158	141	131	171	170	136	148	126	209
ENSCSAG00000001761	ENSCSAT00000016768	2	3	4	2	6	0	1	1	2	2	0	0	0
ENSCSAG00000001762	ENSCSAT00000016769	260	251	241	301	258	278	207	288	406	229	229	186	307
ENSCSAG00000001763	ENSCSAT00000016766,ENSCSAT00000016767	191	172	162	186	193	269	165	225	419	214	241	207	423
ENSCSAG00000001764	ENSCSAT00000016765	472	426	483	469	485	648	361	636	703	505	418	437	609
ENSCSAG00000001765	ENSCSAT00000016763	30	34	41	31	41	28	20	22	34	30	28	29	46
ENSCSAG00000001766	ENSCSAT00000016764	10	14	8	7	8	15	11	15	20	14	12	11	22
ENSCSAG00000001767	ENSCSAT00000016762	157	142	151	164	187	129	106	181	121	113	78	90	127
ENSCSAG00000001768	ENSCSAT00000016760	220	202	217	197	181	237	180	300	190	298	316	234	306
ENSCSAG00000001769	ENSCSAT00000016761	1	0	0	0	0	1	0	0	0	0	0	0	0
ENSCSAG00000001770	ENSCSAT00000016758	1	0	2	1	1	1	2	0	1	0	1	0	0
ENSCSAG00000001771	ENSCSAT00000016759	5	2	3	2	0	1	0	3	0	0	4	1	0
ENSCSAG00000001772	ENSCSAT00000016757	0	0	0	0	0	0	0	0	0	0	0	1	0
ENSCSAG00000001773	ENSCSAT00000016756	0	0	0	0	0	0	0	0	0	0	0	0	0
ENSCSAG00000001774	ENSCSAT00000016754	0	0	0	0	0	0	0	0	0	0	0	0	0
ENSCSAG00000001775	ENSCSAT00000016755	44	30	40	41	23	40	24	50	22	9	11	9	9
ENSCSAG00000001776	ENSCSAT00000016753	0	0	0	0	0	0	0	0	0	0	0	0	0
ENSCSAG00000001777	ENSCSAT00000016752	133	149	161	169	133	152	107	161	240	213	247	200	426
ENSCSAG00000001778	ENSCSAT00000016751	46	50	61	47	48	52	42	46	46	30	39	26	33
ENSCSAG00000001779	ENSCSAT00000016750	761	804	823	842	983	679	502	701	1179	503	483	430	726
ENSCSAG00000001780	ENSCSAT00000016749	305	328	336	362	261	288	211	304	239	161	213	165	239
ENSCSAG00000001781	ENSCSAT00000016747	119	107	119	114	97	76	63	93	139	72	71	61	113
ENSCSAG00000001782	ENSCSAT00000016746	656	671	718	658	197	7615	5308	8071	7506	6412	6432	5750	7362
ENSCSAG00000001783	ENSCSAT00000016745	0	0	0	0	0	0	0	0	0	1	1	0	0
ENSCSAG00000001784	ENSCSAT00000016748	0	0	0	0	0	0	0	0	1	0	0	0	0
ENSCSAG00000001785	ENSCSAT00000016743	0	0	0	0	0	0	0	0	0	0	0	0	0
ENSCSAG00000001786	ENSCSAT00000016744	11	10	20	10	7	7	7	6	11	1	1	1	2
ENSCSAG00000001787	ENSCSAT00000016742	76	69	83	74	43	84	56	93	83	87	76	76	121
ENSCSAG00000001788	ENSCSAT00000016741	0	3	0	1	1	3	3	0	0	0	1	0	0
ENSCSAG00000001789	ENSCSAT00000016739	37	35	38	28	32	41	32	40	44	34	39	25	43
ENSCSAG00000001790	ENSCSAT00000016738	122	117	165	159	172	110	94	104	114	95	121	99	155
ENSCSAG00000001791	ENSCSAT00000016737	0	0	0	0	0	0	0	0	0	0	0	0	0
ENSCSAG00000001792	ENSCSAT00000016740	0	0	0	0	1	0	0	0	0	1	0	0	0
ENSCSAG00000001793	ENSCSAT00000016736	12	13	8	22	5	25	10	19	28	4	9	5	6
ENSCSAG00000001794	ENSCSAT00000016735	636	649	684	657	808	508	405	549	726	254	306	258	343
ENSCSAG00000001795	ENSCSAT00000016734	1233	1208	1279	1265	1337	576	539	720	298	490	469	420	360
ENSCSAG00000001796	ENSCSAT00000016732	1	0	0	0	0	0	0	0	0	0	0	0	0
ENSCSAG00000001797	ENSCSAT00000016731	625.38	612.65	647.38	575.6	517.05	693.32	466.47	665.98	902.65	451.86	375.91	415.25	546.86
ENSCSAG00000001798	ENSCSAT00000016730	512.62	537.35	529.62	528.4	536.95	646.68	482.53	728.02	640.35	534.14	553.09	531.75	589.14
ENSCSAG00000001799	ENSCSAT00000016729	634	624	674	641	543	732	473	742	617	494	468	438	553
ENSCSAG00000001800	ENSCSAT00000016728	3	2	4	2	4	0	0	4	3	59	80	64	105
ENSCSAG00000001801	ENSCSAT00000016733	0	0	0	0	0	0	0	0	0	0	0	0	0
ENSCSAG00000001802	ENSCSAT00000016727	3143	3075	3314	3312	3247	2550	2020	2643	4922	2798	2885	2556	4747
ENSCSAG00000001803	ENSCSAT00000016726	1202	1202	1333	1232	873	1302	788	1365	858	756	669	635	619
ENSCSAG00000001804	ENSCSAT00000016724	396	432	490	425	344	789	563	836	613	550	498	470	589
ENSCSAG00000001805	ENSCSAT00000016723	0	0	0	0	0	0	0	0	0	0	0	0	0
ENSCSAG00000001806	ENSCSAT00000016722	1534	1555	1652	1598	1718	1173	954	1306	1325	568	568	472	678
ENSCSAG00000001807	ENSCSAT00000016721	0	0	0	0	0	0	0	0	0	0	0	0	0
ENSCSAG00000001808	ENSCSAT00000016725	0	0	0	0	0	0	0	0	0	0	0	0	0
ENSCSAG00000001809	ENSCSAT00000016720	427	452	462	414	414	474	310	490	242	233	247	211	189
ENSCSAG00000001810	ENSCSAT00000016719	146	186	186	181	154	127	101	162	49	111	103	120	72
ENSCSAG00000001811	ENSCSAT00000016718	39	40	41	42	39	70	35	51	24	70	62	73	36
ENSCSAG00000001812	ENSCSAT00000016716	19	11	17	11	11	20	9	12	22	3	4	8	4
ENSCSAG00000001813	ENSCSAT00000016717	56	32	69	46	37	77	41	69	58	20	27	32	33
ENSCSAG00000001814	ENSCSAT00000016714	0	1	1	0	0	1	1	1	7	0	1	0	2
ENSCSAG00000001815	ENSCSAT00000016715	103	136	137	125	89	133	68	138	123	71	68	67	75
ENSCSAG00000001816	ENSCSAT00000016713	616	586	597	662	701	427	316	421	564	341	361	334	497
ENSCSAG00000001817	ENSCSAT00000016712	245	239	273	214	215	273	185	294	223	179	187	175	220
ENSCSAG00000001818	ENSCSAT00000016711	1	0	0	0	0	0	0	0	0	0	0	0	0
ENSCSAG00000001819	ENSCSAT00000016710	89	94	97	92	83	125	80	126	75	68	65	53	41
ENSCSAG00000001820	ENSCSAT00000016708	244	245	296	230	232	200	131	208	209	128	141	117	179
ENSCSAG00000001821	ENSCSAT00000016709	70	80	108	70	67	148	72	101	28	52	58	43	43
ENSCSAG00000001822	ENSCSAT00000016705	436	378	419	335	472	490	318	493	453	437	463	374	565
ENSCSAG00000001823	ENSCSAT00000016704	1580	1578	1718	1594	1895	1506	1125	1730	1350	1070	1093	947	1052
ENSCSAG00000001824	ENSCSAT00000016703	2290.22	2294.67	2380.76	2338.04	2534.91	1822.7	1391.29	1938.77	1991.19	1839.02	1967.45	1580.08	2082.66
ENSCSAG00000001825	ENSCSAT00000016707	12	9	14	9	9	18	12	12	20	111	107	82	175
ENSCSAG00000001826	ENSCSAT00000016702	1234.78	1211.33	1341.24	1219.96	1429.09	825.3	698.71	933.23	1401.81	483.98	492.55	467.92	663.34
ENSCSAG00000001827	ENSCSAT00000016701	65	42	59	40	47	63	36	75	103	32	29	24	62
ENSCSAG00000001828	ENSCSAT00000016706	0	0	0	0	0	0	0	0	0	0	0	0	0
ENSCSAG00000001829	ENSCSAT00000016699	1877	1903	2003	1802	1826	1255	977	1435	1362	1411	1609	1308	1910
ENSCSAG00000001830	ENSCSAT00000016698	3502	3492	3572	3427	4514	5058	4032	5340	10392	3295	3576	3010	4938
ENSCSAG00000001831	ENSCSAT00000016696	2	1	5	1	1	1	1	3	0	1	4	3	2
ENSCSAG00000001832	ENSCSAT00000016695	13	18	9	14	12	25	8	16	10	12	9	16	4
ENSCSAG00000001833	ENSCSAT00000016694	0	0	0	0	0	0	1	0	0	0	0	1	0
ENSCSAG00000001834	ENSCSAT00000016693	1	0	1	2	0	13	13	24	13	1	1	1	0
ENSCSAG00000001835	ENSCSAT00000016692	0	0	0	0	0	0	0	0	0	0	0	0	0
ENSCSAG00000001836	ENSCSAT00000016700	1588	1607	1722	1609	1522	1059	745.89	1150	605	431	425	397	219
ENSCSAG00000001837	ENSCSAT00000016691	0	0	6	3	2	0	1	1	0	0	0	0	0
ENSCSAG00000001838	ENSCSAT00000016690	0	0	1	0	2	0	0	0	0	0	0	0	0
ENSCSAG00000001839	ENSCSAT00000016689	0	0	0	0	0	0	0	0	0	0	0	0	0
ENSCSAG00000001840	ENSCSAT00000016688	0	0	0	0	0	0	0	0	0	0	0	0	0
ENSCSAG00000001841	ENSCSAT00000016687	0	0	0	0	0	0	0	0	0	0	0	0	0
ENSCSAG00000001842	ENSCSAT00000016686	0	0	0	0	0	0	0	0	0	0	0	0	0
ENSCSAG00000001843	ENSCSAT00000016684	0	0	0	0	0	0	0	0	0	0	0	0	0
ENSCSAG00000001844	ENSCSAT00000016683	0	0	0	0	0	0	0	0	0	3	4	0	2
ENSCSAG00000001845	ENSCSAT00000016697	0	0	0	0	1	0	0	0	0	0	3	0	0
ENSCSAG00000001846	ENSCSAT00000016682	0	0	0	0	0	0	0	0	0	0	0	0	0
ENSCSAG00000001847	ENSCSAT00000016681	0	0	0	0	0	0	0	0	0	3	4	6	1
ENSCSAG00000001848	ENSCSAT00000016680	0	0	0	0	0	0	0	0	0	0	0	0	0
ENSCSAG00000001849	ENSCSAT00000016679	1	1	0	0	0	0	0	0	0	0	0	0	0
ENSCSAG00000001850	ENSCSAT00000016685	0	1	0	0	0	0	0	1	0	0	0	0	0
ENSCSAG00000001851	ENSCSAT00000016678	7031	6942	7456	7346	10767	17662	13988	18150	40295	22128	23528	19369	42236
ENSCSAG00000001852	ENSCSAT00000016677	0	2	0	2	0	0	1	0	4	0	0	0	0
ENSCSAG00000001853	ENSCSAT00000016676	297	279	322	327	611	392	290	371	1156	685	729	615	969
ENSCSAG00000001854	ENSCSAT00000016675	31	24	27	42	31	64	46	45	61	52	53	48	94
ENSCSAG00000001855	ENSCSAT00000016674	801	820	911	893	2223	591	461	557	1411	616	557	512	1296
ENSCSAG00000001856	ENSCSAT00000016673	1733	1746	1853	1758	2579	3376	2464	3414	6324	3426	3765	3138	5603
ENSCSAG00000001857	ENSCSAT00000016671	7	4	3	2	6	15	11	8	29	12	12	11	34
ENSCSAG00000001858	ENSCSAT00000016672	3	1	3	4	2	11	9	15	28	10	18	15	23
ENSCSAG00000001859	ENSCSAT00000016670	615	629	657	633	750	1174	763	1083	2141	1080	1140	973	2177
ENSCSAG00000001860	ENSCSAT00000016668	269	292	309	294	271	365	220	328	378	308	317	261	392
ENSCSAG00000001861	ENSCSAT00000016669	802	763	800	767	759	1184	962	1321	2066	2864	3198	2701	4978
ENSCSAG00000001862	ENSCSAT00000016667	1127	1124	1228	1187	1339	1092	713	1090	1448	676	672	574	851
ENSCSAG00000001863	ENSCSAT00000016666	20	21	20	24	26	50	29	56	73	29	38	33	39
ENSCSAG00000001864	ENSCSAT00000016665	84	83	72	87	94	134	93	114	177	99	135	125	220
ENSCSAG00000001865	ENSCSAT00000016664	524	500	535	526	650	378	296	418	513	233	241	203	218
ENSCSAG00000001866	ENSCSAT00000016663	1964.21	2048.02	2169.67	2001.07	2295.25	1539.02	1235.41	1687.34	2353.24	963.45	1028.73	875.4	1190.04
ENSCSAG00000001867	ENSCSAT00000016661	0	0	0	0	0	0	0	0	0	0	0	0	0
ENSCSAG00000001868	ENSCSAT00000016662	239	236	248	210	245	290	155	233	237	131	113	123	129
ENSCSAG00000001869	ENSCSAT00000016659	5	7	10	5	7	6	5	11	5	5	6	5	12
ENSCSAG00000001870	ENSCSAT00000016660	0	0	0	0	0	0	0	0	0	0	0	0	0
ENSCSAG00000001871	ENSCSAT00000016658	28.7	13.27	14.98	21.78	16.05	26.05	20.53	38.12	14.38	10.73	13.76	16.08	16.19
ENSCSAG00000001872	ENSCSAT00000016657	1102	1082	1131	1033	866	921	693	991	1001	407	446	361	504
ENSCSAG00000001873	ENSCSAT00000016656	1975	1857	2056	1856	1239	3389	1661	3001	1713	1824	1477	1574	1246
ENSCSAG00000001874	ENSCSAT00000016654	151	143	169	161	75	66	59	92	110	70	68	73	81
ENSCSAG00000001875	ENSCSAT00000016653	2011.3	2004.73	2127.02	1922.22	1775.95	1779.95	1315.47	1972.88	991.62	1029.27	1018.24	977.92	672.81
ENSCSAG00000001876	ENSCSAT00000016652	0	0	0	0	0	0	0	0	0	0	0	0	0
ENSCSAG00000001877	ENSCSAT00000016651	0	0	0	0	0	0	0	0	0	0	0	0	0
ENSCSAG00000001878	ENSCSAT00000016655	0	1	4	3	1	1	0	1	1	1	2	1	2
ENSCSAG00000001879	ENSCSAT00000016649	456	445	491	477	525	379	242	361	434	198	205	196	222
ENSCSAG00000001880	ENSCSAT00000016650	0	0	0	0	0	0	0	0	0	0	0	0	0
ENSCSAG00000001881	ENSCSAT00000016647	297	317	309	291	225	226	186	263	95	218	211	161	109
ENSCSAG00000001882	ENSCSAT00000016646	619	638	606	601	530	715	480	747	666	660	644	574	691
ENSCSAG00000001883	ENSCSAT00000016644	4	5	3	3	0	0	2	1	2	78	73	53	42
ENSCSAG00000001884	ENSCSAT00000016643	942	924	1001	1028	926	965	622	926	960	634	525	556	573
ENSCSAG00000001885	ENSCSAT00000016648	0	0	0	0	0	0	0	0	0	0	0	0	0
ENSCSAG00000001886	ENSCSAT00000016645	403	396	493	421	385	430	294	425	283	234	255	212	197
ENSCSAG00000001887	ENSCSAT00000016641	0	0	0	0	0	0	0	0	0	0	0	0	0
ENSCSAG00000001888	ENSCSAT00000016640	0	0	0	0	0	0	0	0	0	0	0	0	1
ENSCSAG00000001889	ENSCSAT00000016639	0	0	0	0	0	0	0	0	0	0	0	0	0
ENSCSAG00000001890	ENSCSAT00000016638	0	2	0	0	0	0	1	0	1	0	0	0	1
ENSCSAG00000001891	ENSCSAT00000016637	856	803	850	808	863	1060	790	1103	1883	1148	1165	1046	1900
ENSCSAG00000001892	ENSCSAT00000016636	664	633	681	647	673	743	578	800	1112	828	949	780	1154
ENSCSAG00000001893	ENSCSAT00000016635	356	343	359	362	376	457	333	499	510	421	459	386	498
ENSCSAG00000001894	ENSCSAT00000016633	3277	3265	3533	3457	3913	3775	2848	3811	5346	3641	3666	3214	4820
ENSCSAG00000001895	ENSCSAT00000016634	0	1	2	0	0	5.05	0	2.01	5.02	0	2.02	0	0
ENSCSAG00000001896	ENSCSAT00000016632	326.58	316.38	342.19	323.52	342.18	365.2	263.54	360.92	655.35	277.15	304.69	251.33	467.79
ENSCSAG00000001897	ENSCSAT00000016631	74.69	58.7	69.13	73.81	81	96.61	60.33	97.77	158.08	71.7	84.41	66.03	109.5
ENSCSAG00000001898	ENSCSAT00000016630	1233	1140	1274	1260	1248	1954	1373	1979	3050	2000	2078	1743	3532
ENSCSAG00000001899	ENSCSAT00000016642	4	12	3	2	11	5	2	7	9	0	0	1	0
ENSCSAG00000001900	ENSCSAT00000016628	900.31	862.3	952.87	865.19	854	859.34	662.67	969.22	931.9	474.3	524.57	520.97	502.5
ENSCSAG00000001901	ENSCSAT00000016629	289.42	291.62	297.81	331.48	333.82	318.8	261.46	343.08	585.65	340.85	410.31	276.67	661.21
ENSCSAG00000001902	ENSCSAT00000016627	929.94	909	1025.79	968.91	1066	845	674	884	1763	632	727	536.94	1497
ENSCSAG00000001903	ENSCSAT00000016626	1523	1443	1600	1605	1545	1089	833	1203	1591	1007	976	861	1347
ENSCSAG00000001904	ENSCSAT00000016624	321	337	315	325.09	323	284	237	327	503.1	229	240	176	366.06
ENSCSAG00000001905	ENSCSAT00000016623	173	182	184	175.91	185	118	133	168	275.9	151	186	121	325.94
ENSCSAG00000001906	ENSCSAT00000016621	2917.72	2962.31	3215.59	3317.62	3359.98	1905.11	1434.39	1776.11	2873.43	1223.43	1304.36	1036.37	1519.31
ENSCSAG00000001907	ENSCSAT00000016622	0	0	0	0	0	0	1	1	0	0	0	0	0
ENSCSAG00000001908	ENSCSAT00000016620	196	200	189	201	206	282	205	274	166	138	146	106	124
ENSCSAG00000001909	ENSCSAT00000016619	0	0	0	0	0	0	0	0	0	0	0	0	0
ENSCSAG00000001910	ENSCSAT00000016625	0	1	0	0	0	3	0	0	0	0	0	0	1
ENSCSAG00000001911	ENSCSAT00000016617	0	0	2	1	0	3	2	3	1	1	7	1	3
ENSCSAG00000001912	ENSCSAT00000016618	0	0	0	0	0	0	0	0	0	0	0	0	0
ENSCSAG00000001913	ENSCSAT00000016615	1	1	1	0	2	0	0	1	1	0	0	0	0
ENSCSAG00000001914	ENSCSAT00000016614	0	2	3	3	1	15	7	17	8	9	4	10	7
ENSCSAG00000001915	ENSCSAT00000016612	188	186	207	171	119	266	171	289	256	73	76	76	69
ENSCSAG00000001916	ENSCSAT00000016611	0	0	0	0	0	0	0	0	0	0	0	0	0
ENSCSAG00000001917	ENSCSAT00000016613	2394	2375	2407	2496	2786	2433	1900	2562	2258	2027	2063	1776	2329
ENSCSAG00000001918	ENSCSAT00000016610	14	19	10	10	4	25	14	25	18	6	6	2	6
ENSCSAG00000001919	ENSCSAT00000016608	0	1	0	0	0	0	0	0	0	0	0	0	2
ENSCSAG00000001920	ENSCSAT00000016609	1	0	1	1	1	1	1	0	1	1	0	1	0
ENSCSAG00000001921	ENSCSAT00000016606	0	0	0	0	0	0	0	0	0	0	0	0	0
ENSCSAG00000001922	ENSCSAT00000016616	0	0	0	0	0	0	0	0	0	0	0	0	0
ENSCSAG00000001923	ENSCSAT00000016605	0	0	0	0	0	0	0	0	0	0	0	0	0
ENSCSAG00000001924	ENSCSAT00000016607	482.1	495	473	446	552.62	452.9	344.88	474.66	616	467	529.89	439	765
ENSCSAG00000001925	ENSCSAT00000016604	56	43	66	66	60	68	60	66	27	41	43	60	51
ENSCSAG00000001926	ENSCSAT00000016603	0	0	0	0	0	0	0	0	0	0	0	0	0
ENSCSAG00000001927	ENSCSAT00000016602	30	39	45	30	15	84	38	55	54	98	88	70	68
ENSCSAG00000001928	ENSCSAT00000016600	0	0	2	2	1	6	4	5	3	8	3	4	3
ENSCSAG00000001929	ENSCSAT00000016601	1927	1868	2118	1997	2416	1937	1660	2457	1347	1780	1941	1682	1507
ENSCSAG00000001930	ENSCSAT00000016599	0	0	0	0	0	0	0	1	0	0	0	0	0
ENSCSAG00000001931	ENSCSAT00000016598	53	48.64	51	39	49	58	52	50	37	45	69	49	41
ENSCSAG00000001932	ENSCSAT00000016597	104	102	118	102	81	175	106	151	138	82	82	71	67
ENSCSAG00000001933	ENSCSAT00000016596	791	824	913	765	682	735	537	744	1141	599	602	557	911
ENSCSAG00000001934	ENSCSAT00000016595	0	0	0	1	0	0	2	0	0	0	0	1	0
ENSCSAG00000001935	ENSCSAT00000016594	0	2	1	1	0	0	0	2	1	0	0	1	3
ENSCSAG00000001936	ENSCSAT00000016593	0	0	0	0	0	0	0	0	0	0	0	0	0
ENSCSAG00000001937	ENSCSAT00000016592	0	0	0	0	0	0	0	0	0	0	0	0	0
ENSCSAG00000001938	ENSCSAT00000016591	18	16.36	21	23	14	28	23	32	32	42	42	43	38
ENSCSAG00000001939	ENSCSAT00000016590	0	0	0	0	0	0	0	0	0	0	0	0	0
ENSCSAG00000001940	ENSCSAT00000016588	0	0	0	0	0	0	0	0	0	0	0	1	0
ENSCSAG00000001941	ENSCSAT00000016589	1321	1229	1316	1232	1262	1215	902	1288	980	525	551	439	517
ENSCSAG00000001942	ENSCSAT00000016587	0	0	0	0	0	0	0	0	0	0	0	0	0
ENSCSAG00000001943	ENSCSAT00000016586	0	0	0	0	0	0	0	0	0	0	0	0	0
ENSCSAG00000001944	ENSCSAT00000016585	0	0	0	0	0	0	0	0	0	0	0	0	0
ENSCSAG00000001945	ENSCSAT00000016582	0	0	0	0	0	0	0	0	0	0	0	0	1
ENSCSAG00000001946	ENSCSAT00000016583	0	0	0	0	0	1	0	0	0	1	0	1	0
ENSCSAG00000001947	ENSCSAT00000016580	64	61	55	67	60	81	49	88	44	87	93	76	84
ENSCSAG00000001948	ENSCSAT00000016584	22	10	17	17	18	26	22	19	12	12	22	16	19
ENSCSAG00000001949	ENSCSAT00000016579	0	0	0	0	0	0	0	0	0	0	0	0	0
ENSCSAG00000001950	ENSCSAT00000016581	2	1	2	2	3	4	1	1	3	12	14	5	12
ENSCSAG00000001951	ENSCSAT00000016577	0	0	2	0	1	4	2	1	1	1	0	0	0
ENSCSAG00000001952	ENSCSAT00000016576	343	325	341	309	245	541	369	542	467	506	506	424	444
ENSCSAG00000001953	ENSCSAT00000016578	0	0	0	0	0	0	0	0	0	0	0	0	0
ENSCSAG00000001954	ENSCSAT00000016575	0	0	0	0	0	0	0	0	0	0	0	0	0
ENSCSAG00000001955	ENSCSAT00000016574	48	56	52	47	37	84	62	108	47	74	46	45	38
ENSCSAG00000001956	ENSCSAT00000016573	6	2	6	3	1	6	4	5	4	1	1	1	4
ENSCSAG00000001957	ENSCSAT00000016572	561	626	664	582	690	715	504	730	922	563	629	515	640
ENSCSAG00000001958	ENSCSAT00000016571	4	5	2	5	5	29	26	38	17	82	92	84	101
ENSCSAG00000001959	ENSCSAT00000016570	1125	1083	1182	1149	1320	1307	924	1264	1531	1261	1341	1141	1681
ENSCSAG00000001960	ENSCSAT00000016569	0	0	0	0	0	0	0	0	0	0	0	0	0
ENSCSAG00000001961	ENSCSAT00000016568	4	4	3	4	2	6	4	11	4	4	1	6	3
ENSCSAG00000001962	ENSCSAT00000016567	0	0	0	0	0	0	0	0	0	0	1	0	0
ENSCSAG00000001963	ENSCSAT00000016566	60	60	55	54	91	10	10	14	3	5	5	6	2
ENSCSAG00000001964	ENSCSAT00000016565	2932	2907	3221	2841	2882	3129	2188	3325	2564	2561	2581	2268	2375
ENSCSAG00000001965	ENSCSAT00000016564	19	10	16	10	11	7	7	11	21	14	17	13	36
ENSCSAG00000001966	ENSCSAT00000016562	265	274	284	285	302	331	230	289	611	321	319	273	608
ENSCSAG00000001967	ENSCSAT00000016563	973	1029	1027	1046	1457	938	728	1069	1148	894	935	819	1116
ENSCSAG00000001968	ENSCSAT00000016561	758	767	895	838	686	1577	1038	1526	1745	2167	2104	1916	2522
ENSCSAG00000001969	ENSCSAT00000016559	171	202	172	185	217	145	128	157	178	122	116	101	129
ENSCSAG00000001970	ENSCSAT00000016560	0	0	0	0	0	0	0	0	0	1	0	0	0
ENSCSAG00000001971	ENSCSAT00000016558	918	887	943	927	944	1272	897	1324	1571	824	858	714	1025
ENSCSAG00000001972	ENSCSAT00000016557	17	24	24	24	8	35	21	34	28	12	6	7	6
ENSCSAG00000001973	ENSCSAT00000016556	1	4	2	3	4	17	2	3	13	1	0	0	0
ENSCSAG00000001974	ENSCSAT00000016554	80.74	95.11	105.26	87.73	84.31	153	97.03	162.76	85.04	76.69	65.26	71.54	67.15
ENSCSAG00000001975	ENSCSAT00000016555	3636	3645	3968	3835	4643	8461	6082	8762	8952	5084	5343	4678	5987
ENSCSAG00000001976	ENSCSAT00000016552	47	47	73	38	37	135	105	159	138	112	101	115	151
ENSCSAG00000001977	ENSCSAT00000016553	574	560	595	589	720	480	338	507	478	287	270	249	231
ENSCSAG00000001978	ENSCSAT00000016551	282	271	307	254	306	272	201	306	380	269	303	290	410
ENSCSAG00000001979	ENSCSAT00000016550	3	0	1	0	1	1	1	2	1	1	0	4	3.4
ENSCSAG00000001980	ENSCSAT00000016549	355	388	358	374	353	463	311	516	517	511	521	431	616
ENSCSAG00000001981	ENSCSAT00000016548	3	3	9	5	4	31	19	25	27	31	38	24	43.6
ENSCSAG00000001982	ENSCSAT00000016546	1	2	1	0	5	3	5	1	1	2	5	6	5
ENSCSAG00000001983	ENSCSAT00000016544	318	336	319	316	242	333	227	348	308	407	411	337	419
ENSCSAG00000001984	ENSCSAT00000016547	1	2	1	1	0	0	0	0	0	0	0	0	0
ENSCSAG00000001985	ENSCSAT00000016545	0	0	1	0	0	0	0	0	0	0	0	0	0
ENSCSAG00000001986	ENSCSAT00000016543	31597.2	30740.5	33575.8	30373.8	29974.8	41769.3	33475.9	45333.3	61279.6	55793.6	61388.6	50697.3	75658.1
ENSCSAG00000001987	ENSCSAT00000016542	534	495	551	522	747	461	390	526	656	327	413	348	432
ENSCSAG00000001988	ENSCSAT00000016540	338	342	379	337	365	514	403	588	570	548	575	468	809
ENSCSAG00000001989	ENSCSAT00000016539	10	10	8	12	3	8	5	6	10	5	10	3	4
ENSCSAG00000001990	ENSCSAT00000016538	29	35	36	39	37	46	28	42	48	52	45	36	52
ENSCSAG00000001991	ENSCSAT00000016537	2613	2606	2867	2556	2888	2681	2311	3125	4333	2805	2997	2527	3962
ENSCSAG00000001992	ENSCSAT00000016535	33	28	35	44	25	57	46	72	52	57	49	55	56
ENSCSAG00000001993	ENSCSAT00000016534	24	18	20	19	8	28	19	34	45	43	45	40	47
ENSCSAG00000001994	ENSCSAT00000016536	12	11	14	11	12	14	8	16	18	50	65	50	77
ENSCSAG00000001995	ENSCSAT00000016533	93	105	101	78	61	211	131	217	115	124	110	111	95
ENSCSAG00000001996	ENSCSAT00000016532	1	2	0	0	1	1	2	0	3	0	0	0	0
ENSCSAG00000001997	ENSCSAT00000016531	113	126	125	113	122	102	96	126	120	96	81	71	104
ENSCSAG00000001998	ENSCSAT00000016530	272	271	297	282	299	413	358	431	717	432	402	405	788
[truncated: 25,987 more rows]
